# Supplementary material for: Small Molecule Inhibitors of KDM5 Histone Demethylases Increase Radio-Sensitivity of Breast Cancer Cells Over-Expressing JARID1B
Source: Preprints.org preprint supplement (doi:10.20944/preprints201806.0131.v1), 2018-06-08
Supplement: Supplementary file 1 [file SM Table1.xls]

## Sheet: as.data.frame(res)
ensembl ID	baseMean	log2FoldChange	lfcSE	stat	pvalue	padj	symbol	entrez
ENSG00000140465	28671	7.44641	0.121464	61.3056	0	0	CYP1A1	1543
ENSG00000138061	12715.7	3.41965	0.108219	31.5993	3.76976e-219	2.33951e-215	CYP1B1	1545
ENSG00000145425	2026.39	2.08757	0.124439	16.7758	3.66643e-63	1.51692e-59	RPS3A	6189
ENSG00000063438	694.834	2.43782	0.156754	15.5519	1.54507e-54	4.79434e-51	AHRR	57491
ENSG00000198431	18495.8	1.60763	0.103938	15.4672	5.77839e-54	1.43443e-50	TXNRD1	7296
ENSG00000118777	729.01	2.13589	0.151101	14.1355	2.29543e-45	4.74847e-42	ABCG2	9429
ENSG00000115541	999.166	2.36572	0.177594	13.321	1.74868e-40	3.10066e-37	HSPE1	3336
ENSG00000184254	234.857	3.23654	0.254887	12.6979	6.0733e-37	9.42273e-34	ALDH1A3	220
ENSG00000228253	1202.07	-1.49573	0.133411	-11.2114	3.58526e-29	4.94447e-26	ATP8	4509
ENSG00000071082	7886.47	1.18808	0.110611	10.7411	6.52704e-27	8.10136e-24	RPL31	6160
ENSG00000110700	6811.45	1.21411	0.114899	10.5668	4.24712e-26	4.7923e-23	RPS13	6207
ENSG00000108448	716.832	1.64781	0.157531	10.4602	1.31551e-25	1.36067e-22	TRIM16L	147166
ENSG00000181019	14839.1	1.12961	0.108127	10.4471	1.51115e-25	1.4428e-22	NQO1	1728
ENSG00000008513	952.531	1.46278	0.142151	10.2903	7.79165e-25	6.90786e-22	ST3GAL1	6482
ENSG00000109062	13189.5	-1.20599	0.121141	-9.95532	2.39046e-23	1.97802e-20	SLC9A3R1	9368
ENSG00000112306	7968.41	1.18511	0.120425	9.84108	7.49e-23	5.81037e-20	RPS12	6206
ENSG00000171858	4546.58	1.01891	0.104563	9.74446	1.94805e-22	1.4223e-19	RPS21	6227
ENSG00000214263	856.681	1.4779	0.152578	9.68617	3.4525e-22	2.38069e-19
ENSG00000143742	2276.93	1.21908	0.126928	9.60445	7.65636e-22	5.00161e-19	SRP9	6726
ENSG00000124614	545.893	-1.58727	0.165816	-9.57249	1.04359e-21	6.47652e-19	RPS10	6204
ENSG00000168003	27520.2	0.997757	0.104339	9.56265	1.14782e-21	6.78417e-19	SLC3A2	6520
ENSG00000109475	3322.38	1.1134	0.11697	9.51871	1.75342e-21	9.89247e-19	RPL34	6164
ENSG00000140505	94.0449	4.92637	0.518386	9.50328	2.03377e-21	1.09753e-18	CYP1A2	1544
ENSG00000168743	2184	1.06061	0.115866	9.15377	5.4979e-20	2.84333e-17	NPNT	255743
ENSG00000148773	17429.6	-0.821204	0.0903655	-9.08758	1.01265e-19	5.0276e-17	MKI67	4288
ENSG00000065833	2116.76	1.04113	0.11494	9.05802	1.32837e-19	6.34144e-17	ME1	4199
ENSG00000185088	1305.61	1.14644	0.127111	9.01915	1.89547e-19	8.71356e-17	RPS27	6232
ENSG00000186676	207.461	2.13454	0.243191	8.77719	1.6761e-18	7.4299e-16
ENSG00000239830	280.673	1.87241	0.214928	8.71183	2.9902e-18	1.27981e-15
ENSG00000023909	1000.68	1.16576	0.134563	8.66325	4.58491e-18	1.89693e-15	GCLM	2730
ENSG00000112697	2300.08	1.09572	0.127847	8.57054	1.03005e-17	4.12417e-15	TMEM30A	55754
ENSG00000235847	122.078	-3.05425	0.366208	-8.34019	7.41712e-17	2.87691e-14
ENSG00000245532	7668.75	0.793931	0.0955123	8.31234	9.38345e-17	3.52931e-14	NEAT1	283131
ENSG00000198918	10373.8	1.10179	0.132611	8.3085	9.69217e-17	3.53821e-14	RPL39	6170
ENSG00000124126	8911.21	-0.814684	0.0984241	-8.27728	1.26019e-16	4.469e-14	PREX1	57580
ENSG00000129084	421.334	1.45455	0.176439	8.24394	1.66629e-16	5.74501e-14	PSMA1	5682
ENSG00000123416	11932.9	-0.762098	0.0929591	-8.19821	2.43997e-16	8.18512e-14	TUBA1B	10376
ENSG00000151012	423.972	1.51071	0.185633	8.13816	4.01324e-16	1.31085e-13	SLC7A11	23657
ENSG00000184012	910.451	1.09116	0.136054	8.02008	1.05676e-15	3.36321e-13	TMPRSS2	7113
ENSG00000066926	3626.92	0.802664	0.100979	7.94881	1.88313e-15	5.84336e-13	FECH	2235
ENSG00000138600	4335.97	0.912972	0.115282	7.91949	2.38489e-15	7.21981e-13	SPPL2A	84888
ENSG00000221926	613.184	1.26751	0.160848	7.88018	3.26898e-15	9.6606e-13	TRIM16	10626
ENSG00000261578	731.476	1.23576	0.157432	7.84952	4.17631e-15	1.2055e-12
ENSG00000238103	64.0716	5.17385	0.660678	7.83112	4.83528e-15	1.36399e-12
ENSG00000165731	962.074	-1.06105	0.135972	-7.80343	6.02463e-15	1.66173e-12	RET	5979
ENSG00000179151	2403.94	0.849887	0.109302	7.77556	7.51163e-15	2.02683e-12	EDC3	80153
ENSG00000221866	364.12	-1.4772	0.191356	-7.71962	1.16674e-14	3.08118e-12	PLXNA4	91584
ENSG00000173227	3441.51	0.785514	0.102336	7.67582	1.64366e-14	4.25022e-12	SYT12	91683
ENSG00000160182	8465.76	-0.718039	0.0937215	-7.66141	1.83896e-14	4.6582e-12	TFF1	7031
ENSG00000168209	1436.72	1.04961	0.137996	7.60605	2.82592e-14	7.01507e-12	DDIT4	54541
ENSG00000165194	1023.16	-0.981731	0.129605	-7.57476	3.59779e-14	8.75604e-12	PCDH19	57526
ENSG00000197358	204.044	1.88393	0.252354	7.46545	8.30127e-14	1.98145e-11
ENSG00000104081	859.332	1.05135	0.141513	7.42935	1.09134e-13	2.5558e-11	BMF	90427
ENSG00000204899	791.45	1.15218	0.15726	7.32662	2.36029e-13	5.42517e-11	MZT1	440145
ENSG00000117450	11549.6	0.777235	0.106184	7.31971	2.4851e-13	5.60819e-11	PRDX1	5052
ENSG00000236552	164.459	-2.04913	0.280864	-7.29581	2.96859e-13	6.57966e-11	RPL13AP5	728658
ENSG00000121101	559.35	-1.186	0.164471	-7.21101	5.5539e-13	1.20939e-10	TEX14	56155
ENSG00000163659	1027.98	1.00551	0.139583	7.20365	5.86232e-13	1.23939e-10	TIPARP	25976
ENSG00000187720	2422.33	-0.766653	0.106436	-7.20297	5.89138e-13	1.23939e-10	THSD4	79875
ENSG00000101144	1929.76	-0.933758	0.129891	-7.18879	6.53678e-13	1.35224e-10	BMP7	655
ENSG00000101057	5685.53	-0.700049	0.0976135	-7.17164	7.41026e-13	1.50781e-10	MYBL2	4605
ENSG00000127184	5237.24	0.842427	0.118512	7.10839	1.17406e-12	2.3504e-10	COX7C	1350
ENSG00000164938	2223.56	0.914325	0.12867	7.10599	1.1946e-12	2.35355e-10	TP53INP1	94241
ENSG00000198899	67524.5	-0.653442	0.0921125	-7.09396	1.30329e-12	2.52757e-10	ATP6	4508
ENSG00000160179	1275.87	0.910443	0.128578	7.08087	1.43248e-12	2.73538e-10	ABCG1	9619
ENSG00000100604	543.11	-1.1636	0.165811	-7.01764	2.25641e-12	4.24341e-10	CHGA	1113
ENSG00000100605	7135.57	-0.717132	0.102796	-6.97626	3.03133e-12	5.61565e-10	ITPK1	3705
ENSG00000134419	3735.39	0.774915	0.111217	6.9676	3.22386e-12	5.8845e-10	RPS15A	6210
ENSG00000141574	224.339	1.6413	0.236411	6.94259	3.84981e-12	6.9252e-10	SECTM1	6398
ENSG00000198938	99052.7	-0.638528	0.092562	-6.89838	5.25985e-12	9.32646e-10	COX3	4514
ENSG00000111206	4909.14	-0.724956	0.105197	-6.8914	5.52458e-12	9.65791e-10	FOXM1	2305
ENSG00000225630	1620.85	0.803402	0.116689	6.88497	5.78013e-12	9.9643e-10
ENSG00000153130	1615.76	0.941866	0.137006	6.87464	6.21463e-12	1.05666e-09	SCOC	60592
ENSG00000198840	10910.8	-0.733795	0.107353	-6.83535	8.18067e-12	1.37214e-09	ND3	4537
ENSG00000150477	1142.24	-0.886827	0.130296	-6.80627	1.00159e-11	1.65757e-09	KIAA1328	57536
ENSG00000168288	2797.84	0.865455	0.12721	6.80333	1.02227e-11	1.66953e-09	MMADHC	27249
ENSG00000234741	5441.64	0.745682	0.110016	6.77796	1.21885e-11	1.96473e-09	GAS5	60674
ENSG00000244468	212.842	-1.63509	0.243212	-6.72287	1.7818e-11	2.83534e-09
ENSG00000166851	4101.67	-0.711984	0.107202	-6.64149	3.10529e-11	4.87884e-09	PLK1	5347
ENSG00000163041	894.457	0.931752	0.140485	6.63237	3.30329e-11	5.12506e-09	H3F3A	3020
ENSG00000137337	3226.42	-0.707067	0.106891	-6.61485	3.71923e-11	5.69915e-09	MDC1	9656
ENSG00000105372	16242.9	0.652281	0.0988568	6.59824	4.16071e-11	6.29789e-09	RPS19	6223
ENSG00000169019	389.958	1.23168	0.187561	6.56684	5.13954e-11	7.68577e-09	COMMD8	54951
ENSG00000198242	2592.77	0.845806	0.128936	6.55987	5.38551e-11	7.95773e-09	RPL23A	6147
ENSG00000138777	2083.77	0.781473	0.119855	6.52018	7.02229e-11	1.02542e-08	PPA2	27068
ENSG00000143126	6258.64	-0.714284	0.109716	-6.51032	7.49919e-11	1.08233e-08	CELSR2	1952
ENSG00000100441	1618.47	0.804634	0.124041	6.48686	8.7646e-11	1.25042e-08	KHNYN	23351
ENSG00000167461	1334.13	-0.801283	0.123814	-6.47167	9.69252e-11	1.36709e-08	RAB8A	4218
ENSG00000180611	640.307	0.993831	0.153612	6.46974	9.81745e-11	1.36915e-08	MB21D2	151963
ENSG00000103257	124694	0.674344	0.104363	6.46153	1.03651e-10	1.42946e-08	SLC7A5	8140
ENSG00000104549	6730.34	-0.612103	0.0961645	-6.36517	1.95074e-10	2.6318e-08	SQLE	6713
ENSG00000228716	2074.92	-0.703824	0.110565	-6.3657	1.94402e-10	2.6318e-08	DHFR	1719
ENSG00000147224	1050.45	0.824487	0.129773	6.35331	2.10728e-10	2.81242e-08	PRPS1	5631
ENSG00000133466	1289.42	-0.783416	0.123397	-6.34873	2.17103e-10	2.86668e-08	C1QTNF6	114904
ENSG00000137804	2714.68	-0.67904	0.107115	-6.33933	2.30761e-10	3.01495e-08	NUSAP1	51203
ENSG00000251562	9909.15	0.582436	0.0919007	6.33767	2.33262e-10	3.01588e-08	MALAT1	378938
ENSG00000131759	2838.81	-0.721549	0.113984	-6.33028	2.44723e-10	3.09949e-08	RARA	5914
ENSG00000173915	1295.85	0.810782	0.128075	6.33053	2.44327e-10	3.09949e-08	USMG5	84833
ENSG00000205542	867.234	0.884315	0.139913	6.32044	2.60814e-10	3.26992e-08	TMSB4X	7114
ENSG00000178951	1607.52	-0.92068	0.146208	-6.29705	3.03359e-10	3.76529e-08	ZBTB7A	51341
ENSG00000013810	3041.26	-0.662907	0.105675	-6.27307	3.54006e-10	4.35042e-08	TACC3	10460
ENSG00000071282	276.529	1.44572	0.231954	6.23278	4.58237e-10	5.57612e-08	LMCD1	29995
ENSG00000132963	2448.94	0.823712	0.132806	6.20236	5.56214e-10	6.66442e-08	POMP	51371
ENSG00000198712	170245	-0.595537	0.0960274	-6.20174	5.58411e-10	6.66442e-08	COX2	4513
ENSG00000100292	353.077	1.17375	0.18988	6.18154	6.34773e-10	7.50362e-08	HMOX1	3162
ENSG00000213228	1657.94	-0.81788	0.132862	-6.15586	7.46702e-10	8.74346e-08
ENSG00000181788	3157.27	-0.635045	0.103741	-6.12144	9.27354e-10	1.07573e-07	SIAH2	6478
ENSG00000151892	9033.3	-0.564713	0.0925457	-6.10199	1.04755e-09	1.20391e-07	GFRA1	2674
ENSG00000235123	8391.32	-0.740109	0.121464	-6.09324	1.10651e-09	1.26e-07	DSCAM-AS1	100506492
ENSG00000183199	87.6685	-2.20152	0.367362	-5.99278	2.06284e-09	2.32763e-07
ENSG00000143845	1663.84	-0.712622	0.119043	-5.98625	2.14735e-09	2.40116e-07	ETNK2	55224
ENSG00000198804	177483	-0.612846	0.102449	-5.98194	2.20501e-09	2.44362e-07	COX1	4512
ENSG00000197756	12558.1	0.627712	0.105222	5.96561	2.43723e-09	2.67707e-07	RPL37A	6168
ENSG00000174444	31820.2	0.568385	0.0957678	5.93503	2.93786e-09	3.19866e-07	RPL4	6124
ENSG00000249731	703.503	-0.970071	0.163616	-5.92896	3.04854e-09	3.2903e-07
ENSG00000164104	6503.07	-0.592644	0.100547	-5.89418	3.76558e-09	4.02917e-07	HMGB2	3148
ENSG00000115419	1247.77	0.827515	0.14055	5.88767	3.91674e-09	4.1551e-07	GLS	2744
ENSG00000237649	3224.09	-0.615633	0.104615	-5.88476	3.98633e-09	4.19308e-07	KIFC1	3833
ENSG00000140374	6443.77	0.602398	0.102393	5.88322	4.02357e-09	4.19668e-07	ETFA	2108
ENSG00000115468	303.484	-1.17521	0.200359	-5.86554	4.4768e-09	4.6305e-07	EFHD1	80303
ENSG00000189060	7624.45	-0.611608	0.104479	-5.85388	4.80239e-09	4.92622e-07	H1F0	3005
ENSG00000175894	240.581	1.4014	0.239752	5.8452	5.05953e-09	5.14745e-07	TSPEAR	54084
ENSG00000112378	2607.12	0.640473	0.10971	5.8379	5.28636e-09	5.3345e-07	PERP	64065
ENSG00000109814	1280.99	0.752665	0.129283	5.82183	5.82078e-09	5.82642e-07	UGDH	7358
ENSG00000170855	1325.98	0.740693	0.127317	5.81771	5.96596e-09	5.92396e-07	TRIAP1	51499
ENSG00000249614	530.063	-0.948692	0.16317	-5.81413	6.09493e-09	6.00398e-07
ENSG00000198888	25722.1	-0.607414	0.104606	-5.8067	6.37178e-09	6.22729e-07	ND1	4535
ENSG00000229117	6231.78	0.680565	0.117383	5.79783	6.71794e-09	6.5143e-07	RPL41	6171
ENSG00000115380	757.193	-0.821095	0.141744	-5.79282	6.92124e-09	6.65941e-07	EFEMP1	2202
ENSG00000125629	580.854	0.988188	0.171387	5.76582	8.12615e-09	7.7586e-07	INSIG2	51141
ENSG00000179104	833.074	0.805304	0.140511	5.73127	9.96829e-09	9.44476e-07	TMTC2	160335
ENSG00000107984	1093.73	-0.746083	0.131093	-5.69125	1.26111e-08	1.18206e-06	DKK1	22943
ENSG00000166025	2245.16	-0.632679	0.111181	-5.69051	1.26663e-08	1.18206e-06	AMOTL1	154810
ENSG00000143106	4542.28	0.626833	0.110227	5.68673	1.29496e-08	1.19948e-06	PSMA5	5686
ENSG00000203875	1217.61	0.834488	0.147812	5.64562	1.64588e-08	1.51324e-06	SNHG5	387066
ENSG00000141568	3159.88	-0.619481	0.109868	-5.63839	1.71647e-08	1.56653e-06	FOXK2	3607
ENSG00000165480	1333.1	-0.676443	0.120246	-5.62551	1.84958e-08	1.66355e-06	SKA3	221150
ENSG00000198886	196253	-0.555298	0.0987043	-5.62587	1.84572e-08	1.66355e-06	ND4	4538
ENSG00000088325	8628.31	-0.516543	0.0921493	-5.6055	2.07651e-08	1.85422e-06	TPX2	22974
ENSG00000089356	743.65	0.845933	0.151237	5.59342	2.22635e-08	1.94719e-06	FXYD3	5349
ENSG00000164611	2723.08	-0.613834	0.109744	-5.59332	2.22769e-08	1.94719e-06	PTTG1	9232
ENSG00000198695	25386.4	-0.549083	0.0981586	-5.59383	2.22109e-08	1.94719e-06	ND6	4541
ENSG00000151715	167.845	1.45157	0.260323	5.57604	2.46056e-08	2.1357e-06	TMEM45B	120224
ENSG00000158545	3354.85	-0.624184	0.111977	-5.57421	2.48661e-08	2.14332e-06	ZC3H18	124245
ENSG00000175550	1335.15	-0.717413	0.129025	-5.56025	2.69392e-08	2.306e-06	DRAP1	10589
ENSG00000130066	1084.26	0.719726	0.129489	5.55819	2.72583e-08	2.30715e-06	SAT1	6303
ENSG00000197956	1045.56	0.909138	0.16358	5.55777	2.73245e-08	2.30715e-06	S100A6	6277
ENSG00000169230	906.077	-0.921311	0.165938	-5.55216	2.82166e-08	2.36638e-06	PRELID1	27166
ENSG00000006712	2677.76	-0.594217	0.107113	-5.54756	2.89683e-08	2.41312e-06	PAF1	54623
ENSG00000122406	12584.9	0.549532	0.0991506	5.54239	2.98369e-08	2.46891e-06	RPL5	6125
ENSG00000254759	95.8947	-1.92443	0.347363	-5.5401	3.023e-08	2.48486e-06
ENSG00000081277	906.641	0.745356	0.13483	5.52813	3.23663e-08	2.62175e-06	PKP1	5317
ENSG00000141753	2070.7	-0.716189	0.129574	-5.52725	3.25289e-08	2.62175e-06	IGFBP4	3487
ENSG00000197780	873.293	0.81341	0.14713	5.52852	3.22952e-08	2.62175e-06	TAF13	6884
ENSG00000253954	486.478	0.910854	0.165429	5.50602	3.67028e-08	2.93907e-06
ENSG00000185164	278.78	1.14444	0.208206	5.49665	3.87081e-08	3.07978e-06	NOMO2	283820
ENSG00000119820	970.491	0.721691	0.13165	5.48188	4.20829e-08	3.32696e-06	YIPF4	84272
ENSG00000137876	2339.01	0.658353	0.120239	5.47536	4.36622e-08	3.42997e-06	RSL24D1	51187
ENSG00000143341	211.62	-1.2634	0.230906	-5.47149	4.46256e-08	3.4836e-06	HMCN1	83872
ENSG00000096092	1070.49	0.755952	0.138267	5.46734	4.5683e-08	3.54386e-06	TMEM14A	28978
ENSG00000136068	7837.25	-0.549785	0.100816	-5.45333	4.94362e-08	3.81119e-06	FLNB	2317
ENSG00000110492	4879.86	-0.689984	0.126567	-5.45154	4.99345e-08	3.82584e-06	MDK	4192
ENSG00000108312	5672.95	-0.582738	0.107106	-5.44073	5.30624e-08	4.02741e-06	UBTF	7343
ENSG00000156689	73.6376	2.13155	0.391856	5.43963	5.3391e-08	4.02741e-06	GLYATL2	219970
ENSG00000171345	35073.8	-0.627277	0.115327	-5.43914	5.35387e-08	4.02741e-06	KRT19	3880
ENSG00000183779	1461.98	-0.820507	0.151096	-5.43038	5.6233e-08	4.2046e-06	ZNF703	80139
ENSG00000151632	138.597	1.54362	0.284388	5.42786	5.7035e-08	4.23903e-06	AKR1C2	1646
ENSG00000112245	14975	-0.51643	0.0952146	-5.42386	5.8326e-08	4.30918e-06	PTP4A1	7803
ENSG00000164626	244.885	-1.1942	0.220545	-5.41479	6.13598e-08	4.5065e-06	KCNK5	8645
ENSG00000107485	13624.9	-0.593211	0.109596	-5.4127	6.20813e-08	4.53267e-06	GATA3	2625
ENSG00000241837	968.185	0.883006	0.163334	5.40614	6.4397e-08	4.67425e-06	ATP5O	539
ENSG00000113810	4161.88	-0.562572	0.104394	-5.38893	7.08795e-08	5.11486e-06	SMC4	10051
ENSG00000237973	288.621	-1.29816	0.240996	-5.38662	7.17932e-08	5.15085e-06
ENSG00000105323	9801.13	-0.524327	0.0981134	-5.34409	9.08701e-08	6.48207e-06	HNRNPUL1	11100
ENSG00000112695	1614.92	0.738866	0.138477	5.33567	9.51912e-08	6.7515e-06	COX7A2	1347
ENSG00000115844	149.295	1.5626	0.293071	5.3318	9.72453e-08	6.858e-06	DLX2	1746
ENSG00000117461	4804.89	0.565165	0.106441	5.30966	1.09827e-07	7.70157e-06	PIK3R3	8503
ENSG00000148834	1307.86	0.680397	0.128497	5.29506	1.18977e-07	8.29629e-06	GSTO1	9446
ENSG00000138764	1671.48	0.689021	0.130316	5.2873	1.24133e-07	8.60747e-06	CCNG2	901
ENSG00000014641	3861.49	0.590202	0.111659	5.28575	1.25193e-07	8.63273e-06	MDH1	4190
ENSG00000114021	1147.65	0.689794	0.130563	5.28322	1.26931e-07	8.70424e-06	NIT2	56954
ENSG00000175895	2629.8	0.582007	0.110317	5.27576	1.32206e-07	9.01619e-06	PLEKHF2	79666
ENSG00000173436	268.634	1.10492	0.209522	5.27352	1.33834e-07	9.07734e-06	MINOS1	440574
ENSG00000112759	2341.28	-0.592947	0.112807	-5.25631	1.46977e-07	9.91458e-06	SLC29A1	2030
ENSG00000272808	127.615	1.55176	0.295331	5.25431	1.4858e-07	9.96853e-06
ENSG00000118242	716.307	0.763052	0.1453	5.25155	1.50828e-07	1.00649e-05	MREG	55686
ENSG00000139508	456.065	0.902131	0.172338	5.23467	1.65279e-07	1.09703e-05	SLC46A3	283537
ENSG00000113328	4000.3	0.636299	0.121782	5.22492	1.74234e-07	1.1463e-05	CCNG1	900
ENSG00000163435	1300.89	0.634776	0.121503	5.22436	1.74762e-07	1.1463e-05	ELF3	1999
ENSG00000225138	523.124	0.919671	0.176061	5.2236	1.75473e-07	1.1463e-05
ENSG00000123485	1234.75	-0.645102	0.123591	-5.21965	1.79259e-07	1.1649e-05	HJURP	55355
ENSG00000204469	16857.4	-0.527414	0.101156	-5.21384	1.84969e-07	1.19575e-05	PRRC2A	7916
ENSG00000164615	1212.45	0.648351	0.124392	5.21215	1.8666e-07	1.20043e-05	CAMLG	819
ENSG00000188229	12493.4	-0.519837	0.0999158	-5.20275	1.96358e-07	1.25629e-05	TUBB4B	10383
ENSG00000198898	2755.84	0.607634	0.116917	5.19712	2.02398e-07	1.28829e-05	CAPZA2	830
ENSG00000105193	8132.02	0.491021	0.0946203	5.18938	2.10993e-07	1.33615e-05	RPS16	6217
ENSG00000132432	950.277	0.759554	0.146515	5.18413	2.17031e-07	1.3674e-05	SEC61G	23480
ENSG00000185825	5168.9	0.513766	0.0991787	5.1802	2.21645e-07	1.38942e-05	BCAP31	10134
ENSG00000173726	3105.22	0.59163	0.114501	5.16702	2.37857e-07	1.48356e-05	TOMM20	9804
ENSG00000197977	1568.78	-0.615094	0.119257	-5.15772	2.49975e-07	1.55135e-05	ELOVL2	54898
ENSG00000111665	1446.78	-0.62159	0.120543	-5.1566	2.51475e-07	1.55289e-05	CDCA3	83461
ENSG00000159388	827.175	0.711895	0.138167	5.15241	2.57164e-07	1.58016e-05	BTG2	7832
ENSG00000136783	702.977	0.80922	0.157434	5.14005	2.7467e-07	1.67941e-05	NIPSNAP3A	25934
ENSG00000137309	4786.79	-0.594755	0.115884	-5.13232	2.86196e-07	1.7413e-05	HMGA1	3159
ENSG00000068489	2336.69	-0.550344	0.107686	-5.11064	3.21075e-07	1.92521e-05	PRR11	55771
ENSG00000147604	7723.85	0.638827	0.124963	5.11211	3.18577e-07	1.92521e-05	RPL7	6129
ENSG00000165637	1788.95	0.599826	0.117359	5.11102	3.20425e-07	1.92521e-05	VDAC2	7417
ENSG00000123728	2053.44	0.676544	0.132454	5.10775	3.26025e-07	1.94549e-05	RAP2C	57826
ENSG00000146386	766.659	0.732621	0.143998	5.0877	3.62429e-07	2.15238e-05	ABRACL	58527
ENSG00000175920	570.59	-0.965005	0.189734	-5.0861	3.65493e-07	2.16024e-05	DOK7	285489
ENSG00000120837	2028.68	0.621952	0.122331	5.08416	3.69256e-07	2.17122e-05	NFYB	4801
ENSG00000135451	2255.46	-0.609018	0.119807	-5.08334	3.7085e-07	2.17122e-05	TROAP	10024
ENSG00000241343	475.472	0.866079	0.170439	5.08146	3.74537e-07	2.18252e-05	RPL36A	6173
ENSG00000116857	2301.81	0.556286	0.109506	5.07995	3.77532e-07	2.18968e-05	TMEM9	252839
ENSG00000198830	8566.22	0.558362	0.110035	5.07441	3.8871e-07	2.24403e-05	HMGN2	3151
ENSG00000115271	842.186	0.777858	0.153494	5.06768	4.02694e-07	2.314e-05	GCA	25801
ENSG00000141858	1526.76	-0.662051	0.131034	-5.05252	4.36018e-07	2.49394e-05	SAMD1	90378
ENSG00000164587	20830.8	0.571898	0.113326	5.0465	4.49978e-07	2.56199e-05	RPS14	6208
ENSG00000249409	189.957	-1.34671	0.267089	-5.04217	4.60292e-07	2.60874e-05
ENSG00000076706	219.136	-1.14766	0.228011	-5.03333	4.82023e-07	2.70757e-05	MCAM	4162
ENSG00000140534	1539.29	-0.592216	0.117659	-5.03331	4.82092e-07	2.70757e-05	TICRR	90381
ENSG00000163682	8722.29	0.593333	0.117919	5.03172	4.8609e-07	2.71772e-05	RPL9	6133
ENSG00000182912	169.609	1.32751	0.264035	5.02779	4.96159e-07	2.76158e-05
ENSG00000144355	372.093	0.935403	0.186788	5.00783	5.50472e-07	3.0502e-05	DLX1	1745
ENSG00000008282	7377.2	0.615411	0.122919	5.00662	5.53945e-07	3.0558e-05	SYPL1	6856
ENSG00000184226	217.51	1.15762	0.231417	5.00232	5.66458e-07	3.11101e-05	PCDH9	5101
ENSG00000143878	4769.44	-0.731413	0.14628	-5.00009	5.73033e-07	3.13326e-05	RHOB	388
ENSG00000141905	2515.37	-0.59566	0.119247	-4.99518	5.87802e-07	3.19014e-05	NFIC	4782
ENSG00000259527	1043.95	-0.646666	0.129464	-4.99493	5.88577e-07	3.19014e-05	LINC00052	145978
ENSG00000007944	1124.07	0.629569	0.126143	4.9909	6.00989e-07	3.24325e-05	MYLIP	29116
ENSG00000259865	82.9063	1.88436	0.378161	4.98296	6.26189e-07	3.36461e-05
ENSG00000121068	3184.83	-0.731283	0.147007	-4.97448	6.54214e-07	3.50005e-05	TBX2	6909
ENSG00000188186	1955.05	0.635539	0.127802	4.97283	6.59828e-07	3.51493e-05	LAMTOR4	389541
ENSG00000197045	3210.42	0.698357	0.14084	4.95851	7.10341e-07	3.76784e-05	GMFB	2764
ENSG00000204370	936.576	0.692712	0.139785	4.95556	7.21209e-07	3.80921e-05	SDHD	6392
ENSG00000169251	3865.85	0.615806	0.124315	4.9536	7.28547e-07	3.83167e-05	NMD3	51068
ENSG00000171202	396.101	0.905558	0.182989	4.94869	7.47134e-07	3.91284e-05	TMEM126A	84233
ENSG00000100526	1362.59	-0.623995	0.126155	-4.94627	7.56502e-07	3.94526e-05	CDKN3	1033
ENSG00000079308	446.129	-0.885562	0.179147	-4.94322	7.68413e-07	3.9906e-05	TNS1	7145
ENSG00000134759	2573.26	0.54509	0.110293	4.94218	7.72554e-07	3.99539e-05	ELP2	55250
ENSG00000011638	873.702	0.700347	0.141961	4.93336	8.08268e-07	4.16176e-05	TMEM159	57146
ENSG00000259380	1895.7	-0.557147	0.112952	-4.9326	8.11429e-07	4.16176e-05
ENSG00000196072	1046.14	0.647529	0.131381	4.92862	8.28131e-07	4.22994e-05	BLOC1S2	282991
ENSG00000087258	65.7411	-2.03268	0.412649	-4.92594	8.39555e-07	4.25329e-05	GNAO1	2775
ENSG00000125148	374.343	-1.04113	0.211331	-4.92652	8.37082e-07	4.25329e-05	MT2A	4502
ENSG00000139044	469.751	-0.818459	0.166586	-4.91313	8.96352e-07	4.52257e-05	B4GALNT3	283358
ENSG00000242294	492.557	0.810927	0.165089	4.91206	9.0123e-07	4.52877e-05	STAG3L5P	101735302
ENSG00000066279	4127.8	-0.530717	0.108176	-4.90606	9.29261e-07	4.6508e-05	ASPM	259266
ENSG00000215030	487.62	-0.870652	0.177794	-4.89698	9.73194e-07	4.85112e-05
ENSG00000065978	7224.59	-0.501164	0.102391	-4.89462	9.84976e-07	4.89021e-05	YBX1	4904
ENSG00000135124	1358.36	-0.655405	0.13399	-4.89143	1.00106e-06	4.95027e-05	P2RX4	5025
ENSG00000198682	385.294	0.873745	0.178952	4.88258	1.04706e-06	5.15718e-05	PAPSS2	9060
ENSG00000205940	470.121	-0.850642	0.17457	-4.87277	1.10042e-06	5.3986e-05
ENSG00000054654	4638.94	-0.492688	0.10151	-4.85357	1.21257e-06	5.91794e-05	SYNE2	23224
ENSG00000168283	1263.81	0.683069	0.140751	4.85304	1.21582e-06	5.91794e-05	BMI1	648
ENSG00000130816	5807.65	-0.492506	0.101514	-4.85162	1.2246e-06	5.93739e-05	DNMT1	1786
ENSG00000124172	5213.87	0.529993	0.109271	4.85026	1.23297e-06	5.95472e-05	ATP5E	514
ENSG00000149503	2329.98	-0.632747	0.130499	-4.84866	1.24295e-06	5.97967e-05	INCENP	3619
ENSG00000114573	3762.77	0.544701	0.11241	4.84565	1.26199e-06	6.04779e-05	ATP6V1A	523
ENSG00000175061	8121.53	0.487857	0.100798	4.83994	1.29875e-06	6.20005e-05	LRRC75A-AS1	125144
ENSG00000182704	6606.8	0.539589	0.111598	4.83509	1.33082e-06	6.3288e-05	TSKU	25987
ENSG00000134970	2153.09	0.782449	0.161865	4.83396	1.33841e-06	6.34059e-05	TMED7	51014
ENSG00000117983	256.119	-1.12503	0.232802	-4.83256	1.3479e-06	6.36126e-05	MUC5B	727897
ENSG00000082175	1795.34	-0.56616	0.11722	-4.82989	1.36608e-06	6.39839e-05	PGR	5241
ENSG00000182004	2384.02	0.707497	0.146467	4.83042	1.36248e-06	6.39839e-05	SNRPE	6635
ENSG00000185651	3289.42	-0.501956	0.103996	-4.82668	1.38829e-06	6.478e-05	UBE2L3	7332
ENSG00000104969	1723.11	-0.590752	0.122639	-4.81699	1.45738e-06	6.77492e-05	SGTA	6449
ENSG00000139163	983.095	0.709493	0.147362	4.81462	1.47477e-06	6.77959e-05	ETNK1	55500
ENSG00000140961	514.793	0.838016	0.174054	4.81469	1.47425e-06	6.77959e-05	OSGIN1	29948
ENSG00000145494	1005.21	-0.724957	0.150572	-4.8147	1.47423e-06	6.77959e-05	NDUFS6	4726
ENSG00000093009	1423.95	-0.569087	0.118457	-4.80417	1.55393e-06	7.11711e-05	CDC45	8318
ENSG00000142453	3068.18	-0.530926	0.110579	-4.80131	1.57632e-06	7.19311e-05	CARM1	10498
ENSG00000080845	1180.86	-0.649328	0.135275	-4.80004	1.58633e-06	7.2123e-05	DLGAP4	22839
ENSG00000153574	847.181	0.651925	0.136062	4.79138	1.65634e-06	7.50311e-05	RPIA	22934
ENSG00000196683	2141.45	0.647371	0.135247	4.78658	1.69644e-06	7.65683e-05	TOMM7	54543
ENSG00000038274	1935	0.548846	0.115082	4.76918	1.84978e-06	8.31864e-05	MAT2B	27430
ENSG00000113649	4031.78	-0.470811	0.0989594	-4.75762	1.95886e-06	8.7774e-05	TCERG1	10915
ENSG00000152700	1946.59	0.559012	0.1176	4.7535	1.99924e-06	8.9261e-05	SAR1B	51128
ENSG00000088356	950.981	0.629384	0.132429	4.75261	2.00807e-06	8.9334e-05	PDRG1	81572
ENSG00000157388	745.328	0.71241	0.149958	4.75075	2.02667e-06	8.98392e-05	CACNA1D	776
ENSG00000107223	2424.99	-0.541969	0.114105	-4.74974	2.03683e-06	8.99686e-05	EDF1	8721
ENSG00000167522	5704.6	-0.491223	0.103527	-4.74487	2.08643e-06	9.18323e-05	ANKRD11	29123
ENSG00000125971	1989.87	-0.541144	0.114106	-4.74245	2.11153e-06	9.26089e-05	DYNLRB1	83658
ENSG00000047346	3275.84	0.549431	0.1159	4.74054	2.13148e-06	9.31547e-05	FAM214A	56204
ENSG00000174903	5842.89	-0.506731	0.10705	-4.73359	2.20579e-06	9.60642e-05	RAB1B	81876
ENSG00000241878	1682.68	-0.558565	0.118057	-4.73131	2.23075e-06	9.68115e-05	PISD	23761
ENSG00000172534	5097.18	-0.631675	0.133676	-4.72541	2.2965e-06	9.93177e-05	HCFC1	3054
ENSG00000178999	1857.64	-0.566077	0.119859	-4.72287	2.32544e-06	0.00010022	AURKB	9212
ENSG00000134222	1631.12	-0.542055	0.114924	-4.71665	2.39756e-06	0.000102971	PSRC1	84722
ENSG00000186106	637.988	0.737342	0.156437	4.71334	2.43683e-06	0.000104296	ANKRD46	157567
ENSG00000135821	2684.24	-0.519402	0.110233	-4.71184	2.45493e-06	0.000104646	GLUL	2752
ENSG00000211584	736.415	0.681408	0.144634	4.71126	2.46185e-06	0.000104646	SLC48A1	55652
ENSG00000134056	501.683	0.782801	0.166348	4.70581	2.52865e-06	0.000107118	MRPS36	92259
ENSG00000196154	269.967	1.00297	0.213457	4.69869	2.61833e-06	0.00011054	S100A4	6275
ENSG00000099250	790.34	0.698642	0.148715	4.69786	2.62899e-06	0.000110614	NRP1	8829
ENSG00000183172	320.006	0.911002	0.194094	4.69361	2.68425e-06	0.000112557	SMDT1	91689
ENSG00000125356	1755.57	0.697339	0.148833	4.68539	2.79425e-06	0.000116775	NDUFA1	4694
ENSG00000004399	900.053	-0.757971	0.161933	-4.68077	2.85803e-06	0.000118246	PLXND1	23129
ENSG00000175063	2250.25	-0.669947	0.143088	-4.68206	2.84009e-06	0.000118246	UBE2C	11065
ENSG00000196208	20164.4	-0.429066	0.091657	-4.68121	2.85186e-06	0.000118246	GREB1	9687
ENSG00000198727	90729.4	-0.428211	0.0915393	-4.67789	2.89846e-06	0.00011952	CYTB	4519
ENSG00000228502	57.7	-2.09443	0.447936	-4.67572	2.9292e-06	0.000120388
ENSG00000125977	2819.58	-0.505069	0.108071	-4.67351	2.961e-06	0.000121293	EIF2S2	8894
ENSG00000008441	789.58	-0.670358	0.143587	-4.66865	3.03181e-06	0.000123702	NFIX	4784
ENSG00000050426	1779.6	0.529624	0.113472	4.66744	3.0497e-06	0.000123702	LETMD1	25875
ENSG00000168036	9963.15	0.435994	0.0934036	4.66786	3.04358e-06	0.000123702	CTNNB1	1499
ENSG00000116299	2009.83	-0.539335	0.115574	-4.66657	3.06269e-06	0.000123824	KIAA1324	57535
ENSG00000255529	595.424	0.77141	0.16535	4.66531	3.08159e-06	0.000124184	POLR2M	81488
ENSG00000070814	4691.06	-0.479254	0.102749	-4.66433	3.09626e-06	0.000124371	TCOF1	6949
ENSG00000011451	1852.51	-0.721412	0.154943	-4.65599	3.22433e-06	0.000128683	WIZ	58525
ENSG00000034713	2375.45	0.542949	0.116613	4.65601	3.22399e-06	0.000128683	GABARAPL2	11345
ENSG00000142686	453.601	0.808619	0.17389	4.65018	3.31651e-06	0.000131938	C1orf216	127703
ENSG00000129204	439.668	0.789652	0.169858	4.64889	3.33734e-06	0.000132342	USP6	9098
ENSG00000108846	144.913	1.28694	0.277142	4.6436	3.42387e-06	0.000135341	ABCC3	8714
ENSG00000172243	92.2757	1.58844	0.342211	4.64171	3.45535e-06	0.000136152	CLEC7A	64581
ENSG00000126698	2200.2	-0.503432	0.108791	-4.6275	3.70112e-06	0.000145374	DNAJC8	22826
ENSG00000160293	1916.36	-0.551754	0.119462	-4.61864	3.86267e-06	0.000151241	VAV2	7410
ENSG00000176788	1182.23	-0.795509	0.1723	-4.61699	3.8935e-06	0.000151969	BASP1	10409
ENSG00000156650	1775.62	-0.532741	0.115617	-4.60782	4.06905e-06	0.000158323	KAT6B	23522
ENSG00000076826	1376.84	-0.774381	0.168237	-4.60293	4.16595e-06	0.000161587	CAMSAP3	57662
ENSG00000178038	536.623	0.773214	0.16811	4.59946	4.23593e-06	0.000163281	ALS2CL	259173
ENSG00000181143	217.271	-1.04286	0.226715	-4.59986	4.22774e-06	0.000163281	MUC16	94025
ENSG00000174945	351.998	-0.9249	0.201406	-4.59221	4.38583e-06	0.000168536	AMZ1	155185
ENSG00000223764	1860.21	0.573687	0.125006	4.58927	4.44802e-06	0.000170398	LOC100130417	100130417
ENSG00000074266	872.35	0.626345	0.136534	4.58745	4.48691e-06	0.000170833	EED	8726
ENSG00000156858	1626.57	-0.543489	0.118465	-4.58777	4.48011e-06	0.000170833	PRR14	78994
ENSG00000083845	11945.6	0.420433	0.0916696	4.5864	4.50963e-06	0.000171173	RPS5	6193
ENSG00000101040	3223.25	-0.480283	0.104738	-4.58556	4.52766e-06	0.000171333	ZMYND8	23613
ENSG00000171604	1356.81	-0.676962	0.147841	-4.579	4.6721e-06	0.000176262	CXXC5	51523
ENSG00000122257	3237.72	-0.470423	0.102857	-4.57354	4.79549e-06	0.000179824	RBBP6	5930
ENSG00000261116	587.291	0.748132	0.16356	4.57406	4.78365e-06	0.000179824
ENSG00000104695	1177.16	0.567826	0.124209	4.57152	4.84196e-06	0.000180769	PPP2CB	5516
ENSG00000174748	12216.4	0.435489	0.0952684	4.57118	4.84982e-06	0.000180769	RPL15	6138
ENSG00000143061	6997.01	-0.449307	0.0984129	-4.56553	4.98227e-06	0.00018515	IGSF3	3321
ENSG00000171282	884.258	-0.827329	0.181277	-4.56391	5.02107e-06	0.000186034
ENSG00000153936	1200.57	0.65654	0.143939	4.56125	5.08507e-06	0.000187845	HS2ST1	9653
ENSG00000116209	1910.1	0.574963	0.126256	4.55393	5.26525e-06	0.000193924	TMEM59	9528
ENSG00000178538	192.283	1.14597	0.252331	4.54153	5.58473e-06	0.000205082	CA8	767
ENSG00000177084	4390.13	-0.450605	0.0992803	-4.53871	5.65999e-06	0.000207232	POLE	5426
ENSG00000167468	4616.75	-0.51304	0.113115	-4.53557	5.7447e-06	0.000209715	GPX4	2879
ENSG00000163644	851.969	0.674077	0.148653	4.53455	5.77258e-06	0.000210115	PPM1K	152926
ENSG00000186468	1459.24	0.559958	0.123519	4.53336	5.80515e-06	0.000210683	RPS23	6228
ENSG00000154518	4453.7	0.460606	0.101695	4.52929	5.91829e-06	0.000214163	ATP5G3	518
ENSG00000145012	1349.94	0.551062	0.122157	4.51111	6.44905e-06	0.000232691	LPP	4026
ENSG00000100528	2072.75	0.506042	0.112309	4.50579	6.61252e-06	0.000237897	CNIH1	10175
ENSG00000110958	7303.15	0.451399	0.100312	4.49995	6.79699e-06	0.000243827	PTGES3	10728
ENSG00000086062	3378.9	-0.457148	0.101673	-4.49625	6.9161e-06	0.000247072	B4GALT1	2683
ENSG00000115461	8960.3	-0.429434	0.0955166	-4.49591	6.92726e-06	0.000247072	IGFBP5	3488
ENSG00000269893	848.8	0.644653	0.143648	4.48773	7.1986e-06	0.000256014	SNHG8	100093630
ENSG00000105486	2268.8	-0.52468	0.116994	-4.48467	7.30255e-06	0.000258952	LIG1	3978
ENSG00000116251	4192.25	0.479541	0.106951	4.48373	7.33503e-06	0.000258952	RPL22	6146
ENSG00000118181	11827.8	-0.426614	0.0951526	-4.48347	7.34378e-06	0.000258952	RPS25	6230
ENSG00000129173	503.075	-0.755255	0.168689	-4.47722	7.56225e-06	0.0002659	E2F8	79733
ENSG00000156162	2093.18	0.529368	0.118408	4.47071	7.79597e-06	0.000273343	DPY19L4	286148
ENSG00000148344	94.4292	-1.56723	0.350856	-4.46686	7.93764e-06	0.000277527	PTGES	9536
ENSG00000011485	2681.96	-0.514674	0.115398	-4.45999	8.1962e-06	0.000284962	PPP5C	5536
ENSG00000114770	3696.99	0.506464	0.113556	4.46002	8.19504e-06	0.000284962	ABCC5	10057
ENSG00000142619	459.126	0.766686	0.172116	4.45447	8.40994e-06	0.000291576	PADI3	51702
ENSG00000145912	2163.41	-0.534484	0.120046	-4.45231	8.49497e-06	0.000293703	NHP2	55651
ENSG00000106628	2795.41	-0.471274	0.105903	-4.45007	8.58424e-06	0.000295965	POLD2	5425
ENSG00000132463	3776.66	0.449481	0.101038	4.44864	8.64141e-06	0.000297111	GRSF1	2926
ENSG00000111897	1709.14	0.573299	0.128891	4.44795	8.66921e-06	0.000297199	SERINC1	57515
ENSG00000121022	1513.37	0.561766	0.126314	4.44739	8.69184e-06	0.000297199	COPS5	10987
ENSG00000075415	11767.2	0.427631	0.0963734	4.43723	9.11249e-06	0.000310726	SLC25A3	5250
ENSG00000088038	1981.03	-0.553542	0.124951	-4.43006	9.4207e-06	0.000319051	CNOT3	4849
ENSG00000165389	2580.39	0.494599	0.111654	4.42976	9.43375e-06	0.000319051	SPTSSA	171546
ENSG00000186185	1622.62	-0.568131	0.128223	-4.43082	9.38753e-06	0.000319051	KIF18B	146909
ENSG00000100567	4037.7	0.519944	0.117441	4.42727	9.54321e-06	0.000321876	PSMA3	5684
ENSG00000103495	1624.58	-0.679511	0.15351	-4.4265	9.5773e-06	0.00032215	MAZ	4150
ENSG00000131153	1690.52	-0.506571	0.114551	-4.42224	9.76822e-06	0.000326801	GINS2	51659
ENSG00000172115	4744.39	0.454433	0.102758	4.42236	9.76265e-06	0.000326801	CYCS	54205
ENSG00000168938	1613.32	0.517431	0.117096	4.41884	9.923e-06	0.000331087	PPIC	5480
ENSG00000197256	1477.91	-0.569817	0.129078	-4.4145	1.01243e-05	0.000336899	KANK2	25959
ENSG00000260032	8659.73	0.423777	0.0960422	4.41241	1.02228e-05	0.000339267	NORAD	647979
ENSG00000012171	367.048	-1.0353	0.234667	-4.41176	1.02533e-05	0.000339371	SEMA3B	7869
ENSG00000233476	82.0469	-1.63162	0.370131	-4.40822	1.04223e-05	0.000344048
ENSG00000076864	722.553	0.672987	0.152863	4.40254	1.06991e-05	0.000352247	RAP1GAP	5909
ENSG00000245694	375.836	0.835689	0.189896	4.40078	1.07865e-05	0.000354184	LOC101927480	101927480
ENSG00000087510	4574.1	-0.450372	0.102592	-4.38994	1.13382e-05	0.00037132	TFAP2C	7022
ENSG00000107372	1558.52	0.508964	0.116212	4.37962	1.18887e-05	0.000386288	ZFAND5	7763
ENSG00000171587	1125.32	-0.55747	0.127285	-4.3797	1.18845e-05	0.000386288	DSCAM	1826
ENSG00000173812	7099.45	0.43936	0.100305	4.38022	1.18562e-05	0.000386288	EIF1	10209
ENSG00000141867	1843.15	-0.541609	0.123701	-4.37836	1.19574e-05	0.000386499	BRD4	23476
ENSG00000165264	520.535	0.762884	0.174222	4.3788	1.19334e-05	0.000386499	NDUFB6	4712
ENSG00000253719	6669.38	0.411032	0.0939023	4.37723	1.20199e-05	0.00038751	ATXN7L3B	552889
ENSG00000110400	3266.02	-0.452173	0.103539	-4.36716	1.25871e-05	0.000404203	NECTIN1	5818
ENSG00000225648	1218.67	-0.538803	0.123384	-4.36689	1.26028e-05	0.000404203	SBDSP1	155370
ENSG00000100316	30290.3	0.383463	0.0878255	4.3662	1.26427e-05	0.000404437	RPL3	6122
ENSG00000161970	5656.26	-0.442738	0.101457	-4.36378	1.27832e-05	0.00040788	RPL26	6154
ENSG00000231500	27815.6	0.502319	0.115163	4.3618	1.28999e-05	0.000410548	RPS18	6222
ENSG00000125868	6210.98	0.450002	0.103362	4.35365	1.33891e-05	0.000425027	DSTN	11034
ENSG00000130254	1641.28	-0.676116	0.155494	-4.34819	1.37266e-05	0.000433639	SAFB2	9667
ENSG00000182952	1546.09	0.546789	0.125753	4.34813	1.37303e-05	0.000433639	HMGN4	10473
ENSG00000198763	35001.7	-0.454788	0.104648	-4.34587	1.38722e-05	0.000437011	ND2	4536
ENSG00000075089	2501.66	0.65797	0.15151	4.34274	1.40715e-05	0.00044105	ACTR6	64431
ENSG00000117984	7208.85	-0.56803	0.130795	-4.3429	1.40615e-05	0.00044105	CTSD	1509
ENSG00000264364	6458.79	0.429464	0.0989211	4.34148	1.41523e-05	0.000442465	DYNLL2	140735
ENSG00000108819	1827.47	-0.521913	0.120344	-4.33684	1.44547e-05	0.000450782	PPP1R9B	84687
ENSG00000116171	1232.45	0.573706	0.132323	4.33563	1.4534e-05	0.000452121	SCP2	6342
ENSG00000179262	5215.77	-0.453946	0.104802	-4.33147	1.48115e-05	0.000459601	RAD23A	5886
ENSG00000215717	1403.9	0.578467	0.133567	4.3309	1.485e-05	0.000459647	TMEM167B	56900
ENSG00000101966	2530.53	0.546418	0.126232	4.32869	1.49998e-05	0.000463127	XIAP	331
ENSG00000171792	1871.27	-0.491497	0.113617	-4.32591	1.51902e-05	0.000467845	RHNO1	83695
ENSG00000079616	4898.02	-0.432294	0.100193	-4.31463	1.59874e-05	0.000491176	KIF22	3835
ENSG00000161714	1660.56	-0.536722	0.12445	-4.31275	1.61239e-05	0.000494147	PLCD3	113026
ENSG00000075702	2004.52	-0.534238	0.123902	-4.31177	1.61955e-05	0.000495118	WDR62	284403
ENSG00000118855	963.251	0.64906	0.150591	4.31008	1.63194e-05	0.000497681	MFSD1	64747
ENSG00000163159	2844.21	-0.459617	0.106678	-4.30845	1.64401e-05	0.000500133	VPS72	6944
ENSG00000139618	1890.69	-0.531018	0.123412	-4.30279	1.68658e-05	0.00051183	BRCA2	675
ENSG00000185697	844.698	-0.601083	0.139837	-4.29846	1.71988e-05	0.000520662	MYBL1	4603
ENSG00000005022	13913.4	0.387574	0.0902268	4.29555	1.74262e-05	0.000524984	SLC25A5	292
ENSG00000151929	3365.43	-0.516895	0.120318	-4.29606	1.73858e-05	0.000524984	BAG3	9531
ENSG00000065154	1368.2	0.569676	0.132676	4.29375	1.75683e-05	0.000527984	OAT	4942
ENSG00000130675	389.299	-1.02304	0.238505	-4.28939	1.79162e-05	0.000536025	MNX1	3110
ENSG00000167978	28412.5	-0.443892	0.103488	-4.28932	1.79222e-05	0.000536025	SRRM2	23524
ENSG00000044115	19874	0.391814	0.0914848	4.28284	1.84526e-05	0.00055056	CTNNA1	1495
ENSG00000163683	2409.83	0.567879	0.132633	4.28158	1.85567e-05	0.00055234	SMIM14	201895
ENSG00000198856	2120.15	0.536083	0.125285	4.27889	1.87823e-05	0.000557719	OSTC	58505
ENSG00000078070	1252.65	0.527921	0.123505	4.2745	1.91564e-05	0.000566614	MCCC1	56922
ENSG00000082497	962.885	-0.582532	0.136287	-4.27431	1.91732e-05	0.000566614	SERTAD4	56256
ENSG00000096080	483.109	-0.703355	0.164695	-4.27064	1.94911e-05	0.000573278	MRPS18A	55168
ENSG00000170500	3329.45	-0.442723	0.10366	-4.27091	1.94681e-05	0.000573278	LONRF2	164832
ENSG00000129235	929.204	0.610798	0.143104	4.2682	1.97056e-05	0.000578218	TXNDC17	84817
ENSG00000092841	12035.6	0.499956	0.117179	4.26658	1.98489e-05	0.000581047	MYL6	4637
ENSG00000116260	2315.99	0.476425	0.111681	4.26596	1.99049e-05	0.000581316	QSOX1	5768
ENSG00000108518	10252.1	-0.492523	0.11555	-4.26242	2.02221e-05	0.000586442	PFN1	5216
ENSG00000147403	12515.8	0.442165	0.10371	4.26347	2.01277e-05	0.000586442	RPL10	6134
ENSG00000189376	162.771	1.12003	0.262751	4.26269	2.01978e-05	0.000586442	C8orf76	84933
ENSG00000103152	593.464	-0.793713	0.186296	-4.2605	2.03966e-05	0.000590123	MPG	4350
ENSG00000100028	3537.76	-0.430449	0.101102	-4.25756	2.06669e-05	0.000595168	SNRPD3	6634
ENSG00000151881	382.94	0.773263	0.181621	4.25757	2.06665e-05	0.000595168	TMEM267	64417
ENSG00000175324	369.909	-0.807693	0.190102	-4.24874	2.14973e-05	0.00061765	LSM1	27257
ENSG00000187735	2530.44	0.492323	0.115914	4.24733	2.16333e-05	0.00062012	TCEA1	6917
ENSG00000105699	1844.97	-0.597196	0.140715	-4.24402	2.19549e-05	0.000626445	LSR	51599
ENSG00000114796	401.962	0.787688	0.185598	4.24405	2.1952e-05	0.000626445	KLHL24	54800
ENSG00000060237	7838.96	-0.395803	0.0933249	-4.24113	2.22401e-05	0.000633128	WNK1	65125
ENSG00000115255	556.023	-0.761316	0.179569	-4.23969	2.23829e-05	0.000634284	REEP6	92840
ENSG00000142669	916.136	-0.588389	0.138778	-4.23979	2.23728e-05	0.000634284	SH3BGRL3	83442
ENSG00000119878	387.551	0.797843	0.188248	4.23825	2.25273e-05	0.000636923	CRIPT	9419
ENSG00000111711	1043.66	0.611671	0.144419	4.2354	2.28144e-05	0.000642538	GOLT1B	51026
ENSG00000143797	664.694	0.624434	0.147437	4.23525	2.28295e-05	0.000642538	MBOAT2	129642
ENSG00000105698	2053.14	-0.678681	0.160304	-4.2337	2.29879e-05	0.000645533	USF2	7392
ENSG00000163870	706.163	0.665218	0.157309	4.22873	2.35015e-05	0.000658466	TPRA1	131601
ENSG00000139438	367.931	-1.00619	0.23836	-4.22129	2.42908e-05	0.000679048	FAM222A	84915
ENSG00000157216	800.698	-0.590906	0.140056	-4.21907	2.45314e-05	0.000684233	SSBP3	23648
ENSG00000189043	3888.1	0.502917	0.119288	4.21598	2.48691e-05	0.000692097	NDUFA4	4697
ENSG00000079432	1533.39	-0.603236	0.143317	-4.2091	2.5639e-05	0.000710356	CIC	23152
ENSG00000087087	5398.59	-0.442851	0.105213	-4.20909	2.56397e-05	0.000710356	SRRT	51593
ENSG00000125375	306.46	0.875136	0.208026	4.20685	2.58954e-05	0.000714254	ATP5S	27109
ENSG00000167470	1437.6	-0.732132	0.174025	-4.20705	2.58729e-05	0.000714254	MIDN	90007
ENSG00000114867	22926.8	-0.40329	0.0958834	-4.20605	2.59878e-05	0.000714462	EIF4G1	1981
ENSG00000143252	3628.53	0.479034	0.113899	4.20578	2.60181e-05	0.000714462	SDHC	6391
ENSG00000114125	978.163	0.561626	0.133835	4.19641	2.71174e-05	0.000743004	RNF7	9616
ENSG00000165632	912.223	-0.557928	0.132983	-4.19547	2.72302e-05	0.000744451	TAF3	83860
ENSG00000075218	1152.57	-0.579584	0.138359	-4.18898	2.80215e-05	0.000764402	GTSE1	51512
ENSG00000198060	1258.97	0.531956	0.127021	4.18795	2.81491e-05	0.000766198	MARCH5	54708
ENSG00000173660	2272.27	0.531434	0.12699	4.18486	2.85347e-05	0.000774996	UQCRH	7388
ENSG00000104897	847.505	-0.6692	0.160421	-4.17151	3.02581e-05	0.000820008	SF3A2	8175
ENSG00000113494	5759.91	-0.414437	0.0993764	-4.17038	3.04094e-05	0.000822312	PRLR	5618
ENSG00000146834	7245.45	-0.468351	0.112347	-4.16879	3.06214e-05	0.000826246	MEPCE	56257
ENSG00000128590	548.79	0.667572	0.160203	4.16703	3.08596e-05	0.000830866	DNAJB9	4189
ENSG00000180694	2875.53	0.505496	0.121332	4.16622	3.09688e-05	0.000832003	TMEM64	169200
ENSG00000138279	3559.21	0.447331	0.107408	4.16476	3.11675e-05	0.00083373	ANXA7	310
ENSG00000175155	462.764	0.716314	0.171985	4.16497	3.11399e-05	0.00083373	YPEL2	388403
ENSG00000143889	1393.19	0.51826	0.124696	4.15619	3.23604e-05	0.000863778	HNRNPLL	92906
ENSG00000139180	310.146	0.834815	0.200986	4.1536	3.2728e-05	0.000871716	NDUFA9	4704
ENSG00000138668	4430.51	-0.434795	0.104739	-4.15124	3.30684e-05	0.000878896	HNRNPD	3184
ENSG00000165943	1190.9	0.514861	0.124043	4.15067	3.31505e-05	0.000879196	MOAP1	64112
ENSG00000141522	2361.94	-0.449094	0.108234	-4.14929	3.3351e-05	0.000882627	ARHGDIA	396
ENSG00000170515	5046.76	-0.413802	0.0997663	-4.14772	3.35804e-05	0.000886808	PA2G4	5036
ENSG00000180817	3719.27	0.4352	0.104938	4.14721	3.36552e-05	0.000886898	PPA1	5464
ENSG00000059804	81.5867	-1.50866	0.36388	-4.14602	3.383e-05	0.000888059	SLC2A3	6515
ENSG00000163125	4029.99	-0.449314	0.108374	-4.14594	3.38424e-05	0.000888059	RPRD2	23248
ENSG00000008394	3002.35	0.427622	0.103239	4.14205	3.44215e-05	0.000901351	MGST1	4257
ENSG00000123349	5019.8	0.443629	0.107145	4.14043	3.46648e-05	0.00090581	PFDN5	5204
ENSG00000034063	1581.38	-0.523746	0.126726	-4.13289	3.58227e-05	0.000932125
ENSG00000147687	1347.98	0.529471	0.128117	4.13271	3.58506e-05	0.000932125	TATDN1	83940
ENSG00000187514	20044.3	-0.414914	0.100405	-4.13241	3.58972e-05	0.000932125	PTMA	5757
ENSG00000132823	1666.6	0.50439	0.122092	4.13121	3.60851e-05	0.000935048	OSER1	51526
ENSG00000151665	230.937	0.976558	0.236581	4.12779	3.66268e-05	0.000947107	PIGF	5281
ENSG00000072501	4153.06	-0.418477	0.101419	-4.12621	3.68791e-05	0.000950245	SMC1A	8243
ENSG00000139921	2404.59	0.500426	0.121294	4.12573	3.69556e-05	0.000950245	TMX1	81542
ENSG00000153037	535.671	0.677129	0.164129	4.12559	3.69778e-05	0.000950245	SRP19	6728
ENSG00000120539	1383.21	-0.490896	0.119003	-4.12508	3.70603e-05	0.000950397	MASTL	84930
ENSG00000101096	349.224	-0.78209	0.189719	-4.12237	3.74995e-05	0.000959678	NFATC2	4773
ENSG00000143368	5298.52	-0.424159	0.102924	-4.12109	3.77092e-05	0.000961728	SF3B4	10262
ENSG00000185305	623.571	0.723494	0.175566	4.12093	3.77346e-05	0.000961728	ARL15	54622
ENSG00000197894	2652.97	0.487076	0.118229	4.11977	3.79253e-05	0.000964609	ADH5	128
ENSG00000175745	278.525	-0.886826	0.215333	-4.11839	3.81524e-05	0.000966425	NR2F1	7025
ENSG00000185551	913.993	-0.561982	0.136443	-4.1188	3.80846e-05	0.000966425	NR2F2	7026
ENSG00000137563	1000.88	0.538294	0.130722	4.11784	3.82437e-05	0.000966764	GGH	8836
ENSG00000182220	1510.35	0.505313	0.122796	4.11505	3.87091e-05	0.000976539	ATP6AP2	10159
ENSG00000184840	5859.54	0.410866	0.099904	4.11261	3.91207e-05	0.00098492	TMED9	54732
ENSG00000138778	2424.29	-0.486579	0.118345	-4.11155	3.93015e-05	0.000987471	CENPE	1062
ENSG00000184203	2289.28	0.460935	0.112141	4.11033	3.9509e-05	0.000990679	PPP1R2	5504
ENSG00000221823	1102.25	0.563124	0.137211	4.10409	4.05915e-05	0.00101577	PPP3R1	5534
ENSG00000136810	3510.13	0.459064	0.111957	4.10036	4.12514e-05	0.00103021	TXN	7295
ENSG00000005469	547.252	0.685841	0.16745	4.09579	4.20729e-05	0.00104651	CROT	54677
ENSG00000121064	599.855	0.64228	0.156808	4.09597	4.20404e-05	0.00104651	SCPEP1	59342
ENSG00000071564	4809.41	-0.581413	0.142078	-4.09222	4.27268e-05	0.00106065	TCF3	6929
ENSG00000134825	847.134	0.557207	0.136298	4.08815	4.34831e-05	0.00107512	TMEM258	746
ENSG00000166337	803.227	-0.594706	0.145458	-4.0885	4.34175e-05	0.00107512	TAF10	6881
ENSG00000078900	233.132	-0.995836	0.2438	-4.08464	4.4145e-05	0.00108932	TP73	7161
ENSG00000143622	980.199	0.614508	0.150538	4.08208	4.46348e-05	0.00109922	RIT1	6016
ENSG00000119318	8990.87	0.376628	0.0922791	4.0814	4.47654e-05	0.00110025	RAD23B	5887
ENSG00000075651	243.468	0.919831	0.225695	4.07554	4.59068e-05	0.00112552	PLD1	5337
ENSG00000100906	2923.51	-0.424735	0.104224	-4.0752	4.59747e-05	0.00112552	NFKBIA	4792
ENSG00000137818	21241.3	0.429819	0.105511	4.07367	4.62785e-05	0.00112871	RPLP1	6176
ENSG00000213619	2132.36	0.468846	0.115093	4.07363	4.62869e-05	0.00112871	NDUFS3	4722
ENSG00000198818	681.882	0.599125	0.147112	4.07257	4.64966e-05	0.0011316	SFT2D1	113402
ENSG00000100462	2534.01	-0.443859	0.109021	-4.07131	4.67492e-05	0.00113552	PRMT5	10419
ENSG00000132541	839.509	0.559358	0.13758	4.06568	4.78929e-05	0.00116103	RIDA	10247
ENSG00000100243	2280.38	-0.492512	0.121209	-4.06332	4.83795e-05	0.00117054	CYB5R3	1727
ENSG00000115233	2612.25	0.452108	0.111325	4.06115	4.88319e-05	0.00117919	PSMD14	10213
ENSG00000127124	403.441	-0.740304	0.182615	-4.05391	5.03689e-05	0.00121394	HIVEP3	59269
ENSG00000130669	2551.86	-0.624025	0.15399	-4.05239	5.06981e-05	0.00121752	PAK4	10298
ENSG00000182575	406.288	-0.711296	0.175529	-4.05231	5.07138e-05	0.00121752	NXPH3	11248
ENSG00000131174	1549.59	0.500067	0.123463	4.05033	5.11448e-05	0.0012255	COX7B	1349
ENSG00000047249	865.132	0.581106	0.143529	4.04872	5.14995e-05	0.00123162	ATP6V1H	51606
ENSG00000126464	1248.02	-0.681645	0.168472	-4.04604	5.20903e-05	0.00124336	PRR12	57479
ENSG00000164032	9797.94	0.445119	0.110227	4.03819	5.3865e-05	0.00128325	H2AFZ	3015
ENSG00000091317	3025.83	0.488142	0.120945	4.03606	5.43556e-05	0.00129246	CMTM6	54918
ENSG00000168350	421.156	-0.93446	0.231698	-4.03309	5.50474e-05	0.0013064	DEGS2	123099
ENSG00000242265	216.695	-0.942046	0.233701	-4.03099	5.55413e-05	0.00131561	PEG10	23089
ENSG00000130517	420.537	0.701371	0.174069	4.02927	5.59512e-05	0.00132279	PGPEP1	54858
ENSG00000135476	2085.71	-0.446629	0.110861	-4.02874	5.60763e-05	0.00132323	ESPL1	9700
ENSG00000172137	120.01	-1.24468	0.309385	-4.02308	5.74415e-05	0.00135287	CALB2	794
ENSG00000006634	2528.58	-0.46812	0.116397	-4.02174	5.77707e-05	0.00135805	DBF4	10926
ENSG00000160075	1968.06	-0.454025	0.112935	-4.02022	5.81436e-05	0.00136166	SSU72	29101
ENSG00000176842	923.776	-0.697442	0.173483	-4.02023	5.81413e-05	0.00136166	IRX5	10265
ENSG00000165244	728.403	-0.578571	0.143966	-4.0188	5.84942e-05	0.00136534	ZNF367	195828
ENSG00000196405	1458.41	-0.527168	0.131179	-4.0187	5.85209e-05	0.00136534	EVL	51466
ENSG00000175130	3390.4	-0.43988	0.109636	-4.01219	6.01569e-05	0.00140088	MARCKSL1	65108
ENSG00000173153	999.517	0.650698	0.162283	4.00965	6.08077e-05	0.00141338	ESRRA	2101
ENSG00000152234	33820.3	0.380202	0.0949397	4.00467	6.21051e-05	0.00144084	ATP5A1	498
ENSG00000213064	1359.32	0.492584	0.123034	4.00363	6.23776e-05	0.00144446	SFT2D2	375035
ENSG00000070047	1431.55	-0.588806	0.147143	-4.0016	6.29159e-05	0.00145421	PHRF1	57661
ENSG00000117592	5479.94	0.413289	0.103375	3.99794	6.38952e-05	0.0014741	PRDX6	9588
ENSG00000008988	4885.84	0.482306	0.120749	3.99427	6.48943e-05	0.00149438	RPS20	6224
ENSG00000105401	5141.64	-0.45944	0.115041	-3.9937	6.50506e-05	0.0014952	CDC37	11140
ENSG00000206573	711.909	0.58198	0.145916	3.98846	6.6504e-05	0.00152578	THUMPD3-AS1	440944
ENSG00000170385	636.49	0.636595	0.159685	3.98656	6.70381e-05	0.0015352	SLC30A1	7779
ENSG00000183684	1844.07	-0.472959	0.118667	-3.98559	6.73128e-05	0.00153857	ALYREF	10189
ENSG00000196230	27659.7	-0.358375	0.0899273	-3.98516	6.74333e-05	0.00153857	TUBB	203068
ENSG00000100804	3029.02	0.427342	0.107257	3.98429	6.76835e-05	0.00154132	PSMB5	5693
ENSG00000102225	2169.66	-0.442589	0.111095	-3.98387	6.78024e-05	0.00154132	CDK16	5127
ENSG00000085872	1099.72	-0.72127	0.181248	-3.97946	6.90727e-05	0.00156733	CHERP	10523
ENSG00000100626	125.968	-1.1715	0.294439	-3.97877	6.92736e-05	0.00156902	GALNT16	57452
ENSG00000130720	261.358	-0.995437	0.250579	-3.97255	7.11081e-05	0.00160755	FIBCD1	84929
ENSG00000171791	4379.9	-0.389467	0.0980499	-3.97213	7.12338e-05	0.00160755	BCL2	596
ENSG00000100297	2613.42	-0.437487	0.110189	-3.97033	7.1772e-05	0.00161676	MCM5	4174
ENSG00000102882	2520.67	-0.457026	0.115358	-3.9618	7.43882e-05	0.00167266	MAPK3	5595
ENSG00000100744	1175.61	0.535807	0.135288	3.9605	7.47924e-05	0.0016787	GSKIP	51527
ENSG00000189143	4367.43	0.487086	0.123133	3.95576	7.62913e-05	0.00170618	CLDN4	1364
ENSG00000240854	136.16	1.15033	0.290799	3.95577	7.62887e-05	0.00170618
ENSG00000196584	1480.29	-0.469888	0.118914	-3.95148	7.76678e-05	0.00173384	XRCC2	7516
ENSG00000146802	2531.42	0.463961	0.117538	3.94733	7.90288e-05	0.00176105	TMEM168	64418
ENSG00000139613	4188.83	-0.432955	0.109696	-3.94686	7.91844e-05	0.00176107	SMARCC2	6601
ENSG00000164983	953.491	0.57663	0.146113	3.94646	7.93135e-05	0.00176107	TMEM65	157378
ENSG00000113597	966.444	0.569589	0.144438	3.94349	8.03041e-05	0.00177988	TRAPPC13	80006
ENSG00000116001	1676.76	0.472319	0.119785	3.94305	8.04507e-05	0.00177995	TIA1	7072
ENSG00000171848	4870.83	-0.384041	0.0974338	-3.94156	8.09537e-05	0.00178789	RRM2	6241
ENSG00000133275	1590.43	-0.605525	0.153676	-3.94027	8.13888e-05	0.00179431	CSNK1G2	1455
ENSG00000058335	803.888	-0.554875	0.140848	-3.93952	8.16434e-05	0.00179673	RASGRF1	5923
ENSG00000184857	326.369	0.751034	0.190694	3.93843	8.20165e-05	0.00180175	TMEM186	25880
ENSG00000124171	2725.33	0.414305	0.105241	3.93674	8.25961e-05	0.00181128	PARD6B	84612
ENSG00000000003	1093.04	0.555352	0.141084	3.93631	8.27428e-05	0.00181129	TSPAN6	7105
ENSG00000155096	6228.07	0.462568	0.117529	3.93579	8.29245e-05	0.00181208	AZIN1	51582
ENSG00000087586	4140.68	-0.397895	0.101151	-3.93366	8.36604e-05	0.00182263	AURKA	6790
ENSG00000149639	4560.8	-0.400047	0.101701	-3.93355	8.37014e-05	0.00182263	SOGA1	140710
ENSG00000117724	4262.07	-0.404367	0.102839	-3.93203	8.42307e-05	0.00182775	CENPF	1063
ENSG00000138074	3596.05	0.401269	0.102045	3.93228	8.41446e-05	0.00182775	SLC5A6	8884
ENSG00000112984	4738.43	-0.382203	0.0972771	-3.92901	8.52948e-05	0.00184146	KIF20A	10112
ENSG00000124006	2498.24	0.514048	0.130813	3.92965	8.50697e-05	0.00184146	OBSL1	23363
ENSG00000198218	2127.53	-0.463323	0.117925	-3.92898	8.53079e-05	0.00184146	QRICH1	54870
ENSG00000106780	2085.85	0.440552	0.112325	3.92213	8.77688e-05	0.00189129	MEGF9	1955
ENSG00000163743	711.507	0.613891	0.156595	3.92024	8.84622e-05	0.00190293	RCHY1	25898
ENSG00000090273	2003.56	-0.459717	0.11735	-3.91749	8.94768e-05	0.00192143	NUDC	10726
ENSG00000175175	493.747	-0.655064	0.167323	-3.91498	9.04135e-05	0.00193819	PPM1E	22843
ENSG00000034510	10163.3	-0.450471	0.115116	-3.91319	9.10853e-05	0.00194922	TMSB10	9168
ENSG00000165891	1268.24	-0.477995	0.122335	-3.90725	9.33516e-05	0.00199429	E2F7	144455
ENSG00000185761	315.782	-0.950759	0.243471	-3.90501	9.42199e-05	0.00200938	ADAMTSL5	339366
ENSG00000138069	3683.42	0.397009	0.101683	3.90439	9.44639e-05	0.00201113	RAB1A	5861
ENSG00000005339	4067.42	-0.457997	0.117356	-3.90261	9.51594e-05	0.00202246	CREBBP	1387
ENSG00000134375	1597.2	0.525731	0.134881	3.89773	9.7098e-05	0.00205818	TIMM17A	10440
ENSG00000175467	2594.02	-0.483781	0.124124	-3.89755	9.71715e-05	0.00205818	SART1	9092
ENSG00000203880	1480.69	0.471559	0.121014	3.89674	9.74972e-05	0.00206156	PCMTD2	55251
ENSG00000136942	6467.6	-0.431933	0.110926	-3.89386	9.86604e-05	0.00207924	RPL35	11224
ENSG00000204356	2563.4	-0.420915	0.108098	-3.89384	9.86683e-05	0.00207924	NELFE	7936
ENSG00000066855	1165.19	0.526555	0.135356	3.89015	0.000100183	0.00210757	MTFR1	9650
ENSG00000072274	15891.3	0.394059	0.101331	3.88883	0.000100728	0.00211188	TFRC	7037
ENSG00000143569	8427.43	-0.373008	0.0959107	-3.88912	0.000100608	0.00211188	UBAP2L	9898
ENSG00000196151	324.095	0.7472	0.192218	3.88726	0.000101383	0.00212204	WDSUB1	151525
ENSG00000102554	401.952	0.683657	0.176127	3.88161	0.000103769	0.00216831	KLF5	688
ENSG00000080546	363.716	0.743379	0.191748	3.87685	0.00010582	0.00220745	SESN1	27244
ENSG00000088247	3913.16	-0.457135	0.117996	-3.87415	0.000106999	0.00221525	KHSRP	8570
ENSG00000133460	521.818	0.636299	0.164251	3.87395	0.000107086	0.00221525	SLC2A11	66035
ENSG00000134262	1366.92	0.47368	0.122257	3.87445	0.000106866	0.00221525	AP4B1	10717
ENSG00000137040	690.729	0.576856	0.148885	3.87451	0.00010684	0.00221525	RANBP6	26953
ENSG00000176153	67.9898	1.53047	0.394993	3.87467	0.000106769	0.00221525	GPX2	2877
ENSG00000138650	121.437	-1.16118	0.299875	-3.87223	0.000107846	0.00222725	PCDH10	57575
ENSG00000125691	9952.54	0.394237	0.101823	3.87179	0.000108037	0.00222751	RPL23	9349
ENSG00000104325	2495.08	0.46047	0.119006	3.8693	0.000109148	0.00224667	DECR1	1666
ENSG00000134248	1616.72	0.481974	0.124588	3.86855	0.000109485	0.00224988	LAMTOR5	10542
ENSG00000174695	4003.48	0.525874	0.136095	3.86402	0.000111535	0.00228821	TMEM167A	153339
ENSG00000103126	2202.24	-0.459783	0.119044	-3.86229	0.000112328	0.00230069	AXIN1	8312
ENSG00000100836	1226.4	0.515402	0.133526	3.85992	0.000113422	0.00231927	PABPN1	8106
ENSG00000106245	1689.31	-0.445738	0.115658	-3.85394	0.000116234	0.00237285	BUD31	8896
ENSG00000106399	900.018	0.55074	0.142951	3.85266	0.000116843	0.00238137	RPA3	6119
ENSG00000164405	2126.61	0.433458	0.112603	3.84942	0.000118399	0.00240914	UQCRQ	27089
ENSG00000165527	2415.63	-0.502314	0.13052	-3.84856	0.000118816	0.00241365	ARF6	382
ENSG00000135679	4650.56	0.394503	0.10255	3.84695	0.000119596	0.00242553	MDM2	4193
ENSG00000149091	3967.73	-0.46993	0.122169	-3.84654	0.000119797	0.00242565	DGKZ	8525
ENSG00000186594	210.818	0.883355	0.229854	3.84311	0.000121484	0.0024558	MIR22HG	84981
ENSG00000100350	1565.05	-0.450361	0.117208	-3.84242	0.000121826	0.00245871	FOXRED2	80020
ENSG00000164919	9453.57	0.490698	0.127884	3.83705	0.000124519	0.00250898	COX6C	1345
ENSG00000164031	1334.45	0.562521	0.14676	3.83292	0.000126632	0.00254741	DNAJB14	79982
ENSG00000169679	3654.5	-0.397442	0.10378	-3.82966	0.000128322	0.00257723	BUB1	699
ENSG00000101447	1930.17	-0.466737	0.121899	-3.82889	0.000128721	0.00258107	FAM83D	81610
ENSG00000221886	263.157	0.801118	0.209453	3.82481	0.000130872	0.00261997	ZBED8	63920
ENSG00000142089	1593.97	-0.463771	0.121292	-3.82359	0.000131524	0.00262879	IFITM3	10410
ENSG00000214194	2229.76	0.465697	0.121873	3.82116	0.000132825	0.00265051	SMIM30	401397
ENSG00000158623	1070.58	0.5108	0.133693	3.82069	0.000133081	0.00265137	COPG2	26958
ENSG00000124802	500.333	0.625573	0.163833	3.81836	0.000134341	0.00267218	EEF1E1	9521
ENSG00000101182	3606.88	0.408951	0.107152	3.81654	0.000135336	0.00267911	PSMA7	5688
ENSG00000120885	3708.43	-0.397232	0.104071	-3.81693	0.000135122	0.00267911	CLU	1191
ENSG00000166987	1427.33	-0.478122	0.125276	-3.81654	0.000135337	0.00267911	MBD6	114785
ENSG00000141367	23730.5	0.360558	0.0945107	3.815	0.000136183	0.00269036	CLTC	1213
ENSG00000170561	711.219	-0.664965	0.174316	-3.81472	0.000136339	0.00269036	IRX2	153572
ENSG00000137166	1346.28	-0.519554	0.13626	-3.81297	0.000137308	0.00270496	FOXP4	116113
ENSG00000173212	368.071	-0.81065	0.212624	-3.8126	0.000137515	0.00270496	MAB21L3	126868
ENSG00000134049	858.247	0.590219	0.154824	3.8122	0.000137735	0.00270501	IER3IP1	51124
ENSG00000198786	108137	-0.34536	0.0906333	-3.81053	0.000138671	0.00271909	ND5	4540
ENSG00000115286	353.746	-0.871765	0.228828	-3.8097	0.000139135	0.00272388	NDUFS7	374291
ENSG00000013561	1841.57	0.446923	0.117362	3.80808	0.000140053	0.00273753	RNF14	9604
ENSG00000179388	691.794	-0.607315	0.159794	-3.8006	0.000144345	0.002817	EGR3	1960
ENSG00000099381	2027.82	-0.481056	0.126763	-3.79491	0.000147695	0.00287785	SETD1A	9739
ENSG00000166508	16863	-0.339321	0.0894324	-3.79417	0.00014814	0.002882	MCM7	4176
ENSG00000198034	16590.4	0.373701	0.0986451	3.78834	0.000151656	0.00294578	RPS4X	6191
ENSG00000101464	817.003	-0.530416	0.140298	-3.78063	0.000156433	0.0030291	PIGU	128869
ENSG00000130600	529.48	-0.839715	0.222087	-3.78101	0.000156195	0.0030291	H19	283120
ENSG00000130558	1220.24	-0.468091	0.123939	-3.77677	0.000158874	0.00307157	OLFM1	10439
ENSG00000173171	727.943	-0.564989	0.149616	-3.77625	0.000159208	0.00307323	MTX1	4580
ENSG00000232164	1470.12	-0.459271	0.121704	-3.77366	0.000160869	0.00310047	LINC01873	729348
ENSG00000164096	1228.86	0.53056	0.140621	3.77299	0.000161303	0.00310402	C4orf3	401152
ENSG00000198464	1791.41	-0.447486	0.118652	-3.77141	0.000162327	0.0031189	ZNF480	147657
ENSG00000179115	4821.61	-0.405293	0.107489	-3.77056	0.000162879	0.00311983	FARSA	2193
ENSG00000188243	454.284	0.669631	0.177577	3.77093	0.000162643	0.00311983	COMMD6	170622
ENSG00000058668	1933.22	-0.422614	0.112153	-3.76819	0.000164436	0.00314481	ATP2B4	493
ENSG00000119616	2026.63	0.447762	0.118846	3.7676	0.000164826	0.00314741	FCF1	51077
ENSG00000187840	833.384	-0.564571	0.149904	-3.76622	0.000165739	0.00315999	EIF4EBP1	1978
ENSG00000164258	660.638	0.608006	0.161454	3.76581	0.00016601	0.00316029	NDUFS4	4724
ENSG00000144867	1594.66	0.469161	0.124625	3.76459	0.000166826	0.00317097	SRPRB	58477
ENSG00000087088	1479.59	0.444477	0.118136	3.76242	0.000168277	0.00319365	BAX	581
ENSG00000160877	5087.46	-0.47166	0.125433	-3.76026	0.000169735	0.00321641	NACC1	112939
ENSG00000127152	537.818	0.594737	0.158249	3.75824	0.000171111	0.00323754	BCL11B	64919
ENSG00000129128	2908.83	0.470437	0.125237	3.75639	0.000172383	0.00325664	SPCS3	60559
ENSG00000136770	1250.8	-0.45972	0.122415	-3.75541	0.000173056	0.00325945	DNAJC1	64215
ENSG00000146670	2883.46	-0.389254	0.103648	-3.75553	0.000172973	0.00325945	CDCA5	113130
ENSG00000156970	1534.29	-0.445965	0.118946	-3.74929	0.000177338	0.00333502	BUB1B	701
ENSG00000168005	787.909	-0.547398	0.146328	-3.74091	0.000183354	0.00343774	C11orf84	144097
ENSG00000239672	1490.44	0.469753	0.125571	3.74092	0.000183346	0.00343774	NME1	4830
ENSG00000167676	482.037	-0.692196	0.18529	-3.73575	0.000187157	0.00350375	PLIN4	729359
ENSG00000064652	550.356	-0.582477	0.156288	-3.72695	0.00019381	0.00362284	SNX24	28966
ENSG00000077312	1903.17	-0.449957	0.120758	-3.7261	0.000194464	0.0036296	SNRPA	6626
ENSG00000104853	4178.52	-0.470265	0.126401	-3.72041	0.000198896	0.00370368	CLPTM1	1209
ENSG00000134824	587.334	-0.580282	0.15598	-3.72025	0.00019903	0.00370368	FADS2	9415
ENSG00000122966	1375.13	-0.448204	0.120505	-3.71939	0.000199706	0.00371071	CIT	11113
ENSG00000206195	247.306	0.822124	0.221207	3.71654	0.000201971	0.00374718	DUXAP8	503637
ENSG00000077147	7216.26	0.433798	0.116842	3.71269	0.00020507	0.00379533	TM9SF3	56889
ENSG00000156411	2421.55	0.459204	0.12369	3.71255	0.000205178	0.00379533	C14orf2	9556
ENSG00000071539	1199.44	-0.491019	0.132374	-3.70932	0.000207815	0.00383838	TRIP13	9319
ENSG00000173207	2873.44	-0.409261	0.110364	-3.70827	0.000208684	0.00384872	CKS1B	1163
ENSG00000140612	4918	0.394921	0.106557	3.7062	0.000210393	0.00387447	SEC11A	23478
ENSG00000176619	4800.46	-0.5363	0.14476	-3.70476	0.000211593	0.0038908	LMNB2	84823
ENSG00000183513	775.411	0.54118	0.146143	3.70309	0.000212987	0.00391064	COA5	493753
ENSG00000160957	2528.84	-0.544936	0.147225	-3.70139	0.000214423	0.0039312	RECQL4	9401
ENSG00000140988	28568.9	-0.467324	0.126269	-3.70101	0.000214743	0.00393125	RPS2	6187
ENSG00000155850	9175.09	-0.389102	0.105181	-3.69934	0.000216161	0.00395138	SLC26A2	1836
ENSG00000146574	347.514	-0.732938	0.198332	-3.69551	0.000219447	0.00400555	CCZ1B	221960
ENSG00000124145	4877.69	0.390095	0.105607	3.69385	0.000220888	0.00402593	SDC4	6385
ENSG00000137210	1588.28	0.474075	0.128373	3.69295	0.000221668	0.00403422	TMEM14B	81853
ENSG00000145354	800.42	0.554608	0.150262	3.69093	0.000223438	0.00406049	CISD2	493856
ENSG00000117713	3916.32	-0.389502	0.105575	-3.68933	0.000224845	0.00408008	ARID1A	8289
ENSG00000172270	6142.72	-0.419713	0.113776	-3.68894	0.000225187	0.00408033	BSG	682
ENSG00000072062	2295.03	-0.449482	0.12194	-3.68608	0.000227737	0.00411632	PRKACA	5566
ENSG00000168539	251.589	0.822119	0.22304	3.68597	0.000227837	0.00411632	CHRM1	1128
ENSG00000096968	591.195	-0.601145	0.163125	-3.68518	0.000228538	0.00412298	JAK2	3717
ENSG00000109065	827.282	0.551259	0.149626	3.68424	0.000229386	0.00413228	NAT9	26151
ENSG00000011304	8975.11	-0.469365	0.127449	-3.68276	0.000230726	0.0041504	PTBP1	5725
ENSG00000136811	2955.13	-0.392206	0.106617	-3.67864	0.000234482	0.00421185	ODF2	4957
ENSG00000214530	8308.74	-0.430107	0.11698	-3.67677	0.000236202	0.00423662	STARD10	10809
ENSG00000244306	303.505	0.731878	0.199272	3.67276	0.000239943	0.0042975	DUXAP10	503639
ENSG00000149273	40212.8	0.352908	0.0961971	3.6686	0.000243886	0.00436132	RPS3	6188
ENSG00000180104	1738.05	0.448366	0.122228	3.66826	0.000244208	0.00436132	EXOC3	11336
ENSG00000013306	8963.91	-0.357777	0.0975664	-3.66701	0.000245402	0.00437634	SLC25A39	51629
ENSG00000161202	3481.5	-0.433144	0.118187	-3.66491	0.000247421	0.00440601	DVL3	1857
ENSG00000100632	4211.43	0.381015	0.103988	3.66405	0.000248261	0.00441464	ERH	2079
ENSG00000129351	11948.7	-0.350646	0.0957237	-3.66311	0.000249174	0.00441687	ILF3	3609
ENSG00000165672	4691.42	0.394908	0.107805	3.66316	0.000249119	0.00441687	PRDX3	10935
ENSG00000184277	712.747	0.534045	0.145802	3.66282	0.000249454	0.00441687	TM2D3	80213
ENSG00000108557	2670.57	-0.51719	0.141517	-3.65462	0.00025756	0.0045539	RAI1	10743
ENSG00000099219	2761.84	0.387424	0.106034	3.65379	0.000258399	0.00455575	ERMP1	79956
ENSG00000164978	388.205	0.681178	0.186417	3.65405	0.000258138	0.00455575	NUDT2	318
ENSG00000198839	1371.91	0.486929	0.133341	3.65175	0.000260457	0.00458552	ZNF277	11179
ENSG00000116266	1861.58	0.440148	0.120564	3.65075	0.000261478	0.00459697	STXBP3	6814
ENSG00000048392	2607.12	0.527742	0.144732	3.64634	0.000266006	0.00466667	RRM2B	50484
ENSG00000100867	210.738	-0.836095	0.229331	-3.6458	0.000266558	0.00466667	DHRS2	10202
ENSG00000104852	4900.16	-0.510259	0.139981	-3.64519	0.000267192	0.00466667	SNRNP70	6625
ENSG00000141449	211.538	-0.835398	0.229186	-3.64507	0.000267322	0.00466667	GREB1L	80000
ENSG00000198130	597.707	0.567802	0.15575	3.64558	0.000266785	0.00466667	HIBCH	26275
ENSG00000084463	2300.2	-0.401776	0.11027	-3.64358	0.000268877	0.00468722	WBP11	51729
ENSG00000105968	3273.72	0.385665	0.105865	3.64299	0.00026949	0.00469133	H2AFV	94239
ENSG00000136699	3346.42	-0.385306	0.105831	-3.64077	0.000271825	0.00472534	SMPD4	55627
ENSG00000132329	83.8293	-1.32008	0.362648	-3.64013	0.000272503	0.0047305	RAMP1	10267
ENSG00000113580	2018.19	0.436801	0.120016	3.63953	0.00027314	0.00473493	NR3C1	2908
ENSG00000173141	1312.76	-0.631533	0.173592	-3.63804	0.00027472	0.00475568	MRPL57	78988
ENSG00000113368	6230.69	-0.35417	0.0973835	-3.63686	0.000275985	0.00477092	LMNB1	4001
ENSG00000117335	3063.04	0.404772	0.111345	3.6353	0.000277655	0.00479311	CD46	4179
ENSG00000211459	17789.5	-0.335203	0.0923957	-3.62791	0.000285723	0.00492554	RNR1	4549
ENSG00000075624	59508.9	-0.358977	0.0990023	-3.62594	0.00028791	0.00495337	ACTB	60
ENSG00000164934	4316.11	0.412161	0.113676	3.62574	0.000288135	0.00495337	DCAF13	25879
ENSG00000181192	5517.76	-0.34928	0.0963557	-3.6249	0.000289071	0.00496258	DHTKD1	55526
ENSG00000095380	961.733	-0.487239	0.134555	-3.62111	0.00029334	0.0050289	NANS	54187
ENSG00000138382	726.933	0.543629	0.150142	3.62076	0.000293744	0.0050289	METTL5	29081
ENSG00000142208	9155.16	-0.363091	0.100342	-3.61852	0.000296288	0.00506546	AKT1	207
ENSG00000172336	1440.57	-0.533306	0.147416	-3.61769	0.000297242	0.00507478	POP7	10248
ENSG00000141027	5581.38	-0.348497	0.0963952	-3.61529	0.000300007	0.00511039	NCOR1	9611
ENSG00000173852	1172.76	0.524993	0.145219	3.61517	0.000300151	0.00511039	DPY19L1	23333
ENSG00000102024	3998.58	0.426842	0.118098	3.61429	0.00030117	0.00512071	PLS3	5358
ENSG00000071626	3348.11	-0.41685	0.115347	-3.61386	0.000301668	0.00512217	DAZAP1	26528
ENSG00000131149	14489	-0.387479	0.107242	-3.61312	0.000302535	0.00512988	GSE1	23199
ENSG00000081014	3550.11	0.422859	0.117129	3.61018	0.00030598	0.0051812	AP4E1	23431
ENSG00000130811	3069.71	-0.382113	0.105889	-3.6086	0.000307848	0.00520574	EIF3G	8666
ENSG00000178764	1760.93	-0.411799	0.114134	-3.60803	0.000308533	0.00521022	ZHX2	22882
ENSG00000130402	11057.8	-0.40574	0.112573	-3.60425	0.000313055	0.00527159	ACTN4	81
ENSG00000137955	1623.19	0.433236	0.120212	3.60393	0.000313441	0.00527159	RABGGTB	5876
ENSG00000174871	148.763	-0.990102	0.274721	-3.60402	0.000313331	0.00527159	CNIH2	254263
ENSG00000104231	1319.96	0.477874	0.132686	3.60153	0.000316348	0.00527988	ZFAND1	79752
ENSG00000110871	1107.97	0.468166	0.129993	3.60146	0.000316437	0.00527988	COQ5	84274
ENSG00000117620	818.484	0.510057	0.141598	3.60214	0.000315607	0.00527988	SLC35A3	23443
ENSG00000166471	886.442	0.486935	0.135207	3.60142	0.000316486	0.00527988	TMEM41B	440026
ENSG00000171631	745.243	0.569113	0.15798	3.60243	0.000315252	0.00527988	P2RY6	5031
ENSG00000179837	2094.27	-0.422162	0.117205	-3.6019	0.000315894	0.00527988
ENSG00000138448	2162.63	0.451388	0.12535	3.60103	0.000316959	0.00528067	ITGAV	3685
ENSG00000168679	245.842	0.813641	0.226121	3.59825	0.000320364	0.00533024	SLC16A4	9122
ENSG00000086015	1453.69	-0.438276	0.121885	-3.5958	0.000323398	0.00537352	MAST2	23139
ENSG00000148840	2474.27	-0.402523	0.112007	-3.59374	0.000325961	0.00540886	PPRC1	23082
ENSG00000145781	902.718	0.534973	0.148955	3.59151	0.000328768	0.00544815	COMMD10	51397
ENSG00000126461	1443.23	-0.613306	0.170885	-3.589	0.00033195	0.00549356	SCAF1	58506
ENSG00000165280	11328.9	0.328005	0.0914133	3.58815	0.000333034	0.00550414	VCP	7415
ENSG00000121104	540.702	-0.586399	0.163462	-3.58738	0.000334012	0.00550565	FAM117A	81558
ENSG00000133606	3223.98	0.37822	0.105429	3.58743	0.000333959	0.00550565	MKRN1	23608
ENSG00000113595	623.916	0.562437	0.156802	3.58692	0.000334605	0.00550811	TRIM23	373
ENSG00000119383	6243.13	0.346481	0.0966589	3.58458	0.000337625	0.00555047	PTPA	5524
ENSG00000148396	6537.32	-0.393439	0.109803	-3.58314	0.000339495	0.00557382	SEC16A	9919
ENSG00000112855	2018.71	0.397675	0.111052	3.58098	0.000342307	0.00561257	HARS2	23438
ENSG00000168672	3948.47	0.355517	0.0992894	3.58061	0.000342788	0.00561304	FAM84B	157638
ENSG00000213741	3772.57	0.480078	0.134132	3.57914	0.000344733	0.00563745	RPS29	6235
ENSG00000106305	999.195	-0.584909	0.163507	-3.57727	0.000347197	0.00566282	AIMP2	7965
ENSG00000133895	1749.73	-0.441994	0.123546	-3.57757	0.0003468	0.00566282	MEN1	4221
ENSG00000011426	4982.89	-0.398685	0.111622	-3.57173	0.000354632	0.00576892	ANLN	54443
ENSG00000160588	729.438	0.513324	0.143706	3.57205	0.000354201	0.00576892	MPZL3	196264
ENSG00000017260	2402.31	0.393365	0.110281	3.56693	0.000361194	0.00584648	ATP2C1	27032
ENSG00000033800	1121.91	-0.449	0.125858	-3.56752	0.000360376	0.00584648	PIAS1	8554
ENSG00000035687	841.46	0.502692	0.140934	3.56686	0.000361283	0.00584648	ADSS	159
ENSG00000146425	1138.46	0.486927	0.13651	3.56697	0.000361129	0.00584648	DYNLT1	6993
ENSG00000164091	3287	0.364612	0.102239	3.56627	0.000362096	0.005852	WDR82	80335
ENSG00000104497	244.929	0.795479	0.223277	3.56275	0.000366996	0.00592295	SNX16	64089
ENSG00000113558	6221.67	0.38979	0.109417	3.56243	0.000367441	0.00592295	SKP1	6500
ENSG00000116350	1602.23	-0.420639	0.118122	-3.56105	0.000369375	0.00593103	SRSF4	6429
ENSG00000133657	6407.1	0.370096	0.103922	3.56129	0.00036903	0.00593103	ATP13A3	79572
ENSG00000149806	4717.96	0.367216	0.103105	3.56159	0.000368612	0.00593103	FAU	2197
ENSG00000102119	1653.01	-0.493952	0.138732	-3.56048	0.000370172	0.00593614	EMD	2010
ENSG00000241553	2179.79	0.393408	0.110543	3.55886	0.000372473	0.00596533	ARPC4	10093
ENSG00000109618	610.192	0.556367	0.156454	3.5561	0.000376404	0.00602053	SEPSECS	51091
ENSG00000099817	2307.72	-0.435658	0.122659	-3.55177	0.000382645	0.00611247	POLR2E	5434
ENSG00000181061	1213.37	0.464431	0.130862	3.54902	0.000386665	0.00616875	HIGD1A	25994
ENSG00000137714	225.013	0.835668	0.235552	3.5477	0.000388616	0.00619191	FDX1	2230
ENSG00000131795	6034.63	-0.341563	0.0963249	-3.54595	0.000391198	0.00619651
ENSG00000149573	468.744	0.651475	0.183699	3.54643	0.000390492	0.00619651	MPZL2	10205
ENSG00000167244	81.0452	-1.34185	0.378431	-3.54582	0.0003914	0.00619651	IGF2	3481
ENSG00000167491	4356.84	-0.4285	0.120812	-3.54684	0.000389886	0.00619651	GATAD2A	54815
ENSG00000233369	72.6052	-1.34511	0.379247	-3.54678	0.000389964	0.00619651	GTF2IP4	100093631
ENSG00000210140	467.343	-0.685451	0.19334	-3.54531	0.000392155	0.00620054
ENSG00000160014	5645.79	-0.368349	0.103933	-3.54412	0.000393924	0.00622059	CALM2	805
ENSG00000235890	67.6813	1.45722	0.411318	3.5428	0.000395898	0.00624382	TSPEAR-AS1	54082
ENSG00000158769	2117.19	0.407951	0.115187	3.54163	0.00039766	0.00626365	F11R	50848
ENSG00000104343	660.632	0.574081	0.162233	3.53862	0.000402224	0.0063275	UBE2W	55284
ENSG00000065526	3605.97	-0.376192	0.106343	-3.53754	0.000403877	0.00634547	SPEN	23013
ENSG00000131507	2045.82	0.431054	0.121928	3.53531	0.000407301	0.00638311	NDFIP1	80762
ENSG00000210082	126502	-0.313911	0.0887875	-3.53553	0.000406964	0.00638311	RNR2	4550
ENSG00000105011	1794.64	-0.400466	0.113352	-3.53296	0.00041094	0.00643202	ASF1B	55723
ENSG00000172602	130.802	1.02754	0.290961	3.53155	0.000413126	0.00645808	RND1	27289
ENSG00000168066	5449.46	-0.352904	0.100045	-3.52743	0.00041961	0.0065512	SF1	7536
ENSG00000158201	375.852	0.637764	0.180934	3.52484	0.000423731	0.00660722	ABHD3	171586
ENSG00000105329	1033.39	-0.641036	0.181919	-3.52375	0.000425485	0.00660966	TGFB1	7040
ENSG00000111885	786.838	0.49777	0.141253	3.52395	0.000425162	0.00660966	MAN1A1	4121
ENSG00000196776	2868.17	0.397402	0.11277	3.524	0.000425084	0.00660966	CD47	961
ENSG00000117298	1558.44	-0.437672	0.124242	-3.52274	0.000427106	0.00662656	ECE1	1889
ENSG00000163931	15621.2	0.350916	0.0996368	3.52195	0.000428381	0.00663803	TKT	7086
ENSG00000100304	2041.86	-0.440343	0.125221	-3.51652	0.000437241	0.0067527	TTLL12	23170
ENSG00000102804	4698.7	0.347448	0.0988074	3.51642	0.000437413	0.0067527	TSC22D1	8848
ENSG00000103489	312.148	-0.687948	0.195603	-3.51707	0.000436346	0.0067527	XYLT1	64131
ENSG00000105048	3274.39	-0.359215	0.102206	-3.51462	0.000440389	0.00676959	TNNT1	7138
ENSG00000110104	842.13	-0.520212	0.14802	-3.51447	0.00044063	0.00676959	CCDC86	79080
ENSG00000124214	4688.43	-0.349131	0.0993142	-3.51542	0.000439066	0.00676959	STAU1	6780
ENSG00000234444	701.789	0.562574	0.160075	3.51444	0.000440689	0.00676959	ZNF736	728927
ENSG00000129514	5740.8	-0.436897	0.124347	-3.51353	0.00044219	0.00678426	FOXA1	3169
ENSG00000115520	931.834	0.490234	0.139571	3.51243	0.000444023	0.00680397	COQ10B	80219
ENSG00000185800	699.917	-0.557693	0.158795	-3.51204	0.000444681	0.00680565	DMWD	1762
ENSG00000116649	2037.15	-0.430022	0.122539	-3.50928	0.000449327	0.00686829	SRM	6723
ENSG00000135373	440.125	-0.639915	0.182549	-3.50544	0.000455861	0.00695959	EHF	26298
ENSG00000105662	460.471	-0.67006	0.191209	-3.50432	0.000457767	0.0069801	CRTC1	23373
ENSG00000261373	672.4	-0.559462	0.15973	-3.50255	0.000460821	0.00701804	VPS9D1-AS1	100128881
ENSG00000167674	1409.88	-0.572036	0.16337	-3.50148	0.000462674	0.00703764	HDGFL2	84717
ENSG00000169129	816.699	-0.482199	0.137752	-3.5005	0.000464393	0.00705513	AFAP1L2	84632
ENSG00000140395	2264.98	0.425664	0.121628	3.49971	0.000465764	0.00706731	WDR61	80349
ENSG00000170144	7888.5	0.345618	0.0988222	3.49738	0.00046986	0.00712077	HNRNPA3	220988
ENSG00000147274	7621.49	-0.333488	0.0954192	-3.49498	0.000474102	0.00717628	RBMX	27316
ENSG00000116128	1155.9	-0.441874	0.126447	-3.49455	0.000474867	0.00717912	BCL9	607
ENSG00000081087	440.893	0.702355	0.201211	3.49063	0.000481882	0.0072763	OSTM1	28962
ENSG00000232973	52.4564	1.59273	0.45668	3.48762	0.000487332	0.00734965	CYP1B1-AS1	285154
ENSG00000157212	1932.49	-0.39176	0.112372	-3.48628	0.000489791	0.00737778	PAXIP1	22976
ENSG00000100439	414.559	0.640423	0.183835	3.48369	0.000494559	0.00741961	ABHD4	63874
ENSG00000127418	1739.56	-0.569178	0.16335	-3.4844	0.00049325	0.00741961	FGFRL1	53834
ENSG00000145743	921.856	0.465742	0.133697	3.48357	0.000494765	0.00741961	FBXL17	64839
ENSG00000172893	8366.98	-0.363294	0.104291	-3.48347	0.000494959	0.00741961	DHCR7	1717
ENSG00000078114	1907.36	0.419592	0.120621	3.4786	0.000504035	0.00754654	NEBL	10529
ENSG00000013375	562.892	0.549345	0.158036	3.47608	0.000508794	0.00758122	PGM3	5238
ENSG00000087269	2374.59	-0.378438	0.108845	-3.47685	0.000507335	0.00758122	NOP14	8602
ENSG00000151849	1263.92	-0.422571	0.121563	-3.47615	0.000508671	0.00758122	CENPJ	55835
ENSG00000167371	147.627	-0.961094	0.276462	-3.4764	0.000508185	0.00758122	PRRT2	112476
ENSG00000174151	866.83	0.474739	0.13665	3.47412	0.000512537	0.00762783	CYB561D1	284613
ENSG00000176476	486.682	-0.586607	0.168887	-3.47337	0.000513962	0.00763988	SGF29	112869
ENSG00000121152	1748.81	-0.397122	0.114454	-3.4697	0.00052103	0.00772478	NCAPH	23397
ENSG00000147041	576.65	-0.574354	0.165531	-3.46976	0.000520915	0.00772478	SYTL5	94122
ENSG00000169181	216.617	-0.803319	0.231541	-3.46944	0.000521541	0.00772478	GSG1L	146395
ENSG00000061938	1800.46	-0.484417	0.139686	-3.4679	0.000524538	0.00774146	TNK2	10188
ENSG00000145979	900.727	0.472608	0.136271	3.46815	0.000524056	0.00774146	TBC1D7	51256
ENSG00000182872	1821.66	-0.403118	0.116226	-3.46839	0.000523592	0.00774146	RBM10	8241
ENSG00000075785	6543.3	-0.344014	0.0992156	-3.46734	0.000525643	0.00774856	RAB7A	7879
ENSG00000179218	16925.4	-0.325026	0.093755	-3.46676	0.000526769	0.00775594	CALR	811
ENSG00000148444	331.746	0.688565	0.198682	3.46566	0.000528923	0.00777843	COMMD3	23412
ENSG00000257093	2513.9	0.386867	0.111656	3.46481	0.000530604	0.00779391	KIAA1147	57189
ENSG00000116288	2776.39	0.381306	0.110077	3.46398	0.000532249	0.00780884	PARK7	11315
ENSG00000151366	561.813	0.542441	0.156625	3.4633	0.00053359	0.00781927	NDUFC2	4718
ENSG00000224578	60.71	1.48259	0.428349	3.46117	0.000537837	0.00787221
ENSG00000078808	2033.09	-0.405494	0.117175	-3.46058	0.000539023	0.00788027	SDF4	51150
ENSG00000169223	5682.32	-0.345688	0.100074	-3.45432	0.000551677	0.00805579	LMAN2	10960
ENSG00000115648	2923.5	-0.367185	0.106334	-3.45314	0.000554111	0.00808182	MLPH	79083
ENSG00000061676	6007.76	0.365719	0.10612	3.44626	0.000568399	0.00823751	NCKAP1	10787
ENSG00000148291	565.842	-0.574364	0.16665	-3.44654	0.000567823	0.00823751	SURF2	6835
ENSG00000160111	241.886	0.782104	0.226882	3.44718	0.000566469	0.00823751	CPAMD8	27151
ENSG00000164985	1444.23	-0.437138	0.126807	-3.44727	0.000566278	0.00823751	PSIP1	11168
ENSG00000166136	284.259	0.718243	0.208423	3.44609	0.000568768	0.00823751	NDUFB8	4714
ENSG00000176994	921.826	-0.465025	0.134912	-3.44689	0.000567089	0.00823751	SMCR8	140775
ENSG00000130204	3163.9	-0.36186	0.105033	-3.44521	0.000570609	0.00825455	TOMM40	10452
ENSG00000174021	611.677	-0.54416	0.158089	-3.4421	0.000577212	0.00834034	GNG5	2787
ENSG00000129083	3345.93	0.393072	0.114226	3.44116	0.000579217	0.00835958	COPB1	1315
ENSG00000135211	488.01	0.566676	0.164726	3.44012	0.000581457	0.00838217	TMEM60	85025
ENSG00000118513	1556.89	-0.402717	0.117143	-3.43782	0.000586421	0.00844391	MYB	4602
ENSG00000109919	4372.08	0.344192	0.100179	3.43577	0.000590878	0.00849424	MTCH2	23788
ENSG00000236824	1690.42	-1.78755	0.520306	-3.43558	0.000591285	0.00849424	BCYRN1	618
ENSG00000048991	2602.34	-0.375705	0.109388	-3.43462	0.000593388	0.00850477	R3HDM1	23518
ENSG00000139405	1046.39	-0.512971	0.149345	-3.43481	0.00059296	0.00850477	RITA1	84934
ENSG00000170906	794.912	-0.483115	0.140689	-3.43393	0.000594901	0.00851662	NDUFA3	4696
ENSG00000115657	184.93	0.835355	0.243331	3.43301	0.000596931	0.00853583	ABCB6	10058
ENSG00000151726	570.839	0.558679	0.162793	3.43183	0.000599524	0.00856306	ACSL1	2180
ENSG00000130202	2197.93	-0.413391	0.120481	-3.43116	0.000600995	0.00857419	NECTIN2	5819
ENSG00000108826	942.919	0.497896	0.145135	3.43057	0.000602309	0.00858307	MRPL27	51264
ENSG00000033178	2240.68	0.404283	0.117915	3.42859	0.000606721	0.0086353	UBA6	55236
ENSG00000125505	2266.01	-0.457859	0.133553	-3.4283	0.000607365	0.0086353	MBOAT7	79143
ENSG00000106772	101.934	-1.12887	0.329336	-3.4277	0.000608721	0.00864467	PRUNE2	158471
ENSG00000061936	1653.13	-0.42409	0.123743	-3.42717	0.000609898	0.00865149	SFSWAP	6433
ENSG00000213024	2706.43	-0.375596	0.109628	-3.42611	0.000612299	0.00867563	NUP62	23636
ENSG00000144746	1945.57	0.413448	0.120732	3.42451	0.000615901	0.00871672	ARL6IP5	10550
ENSG00000106355	1321.33	0.428435	0.125136	3.42376	0.000617622	0.00873112	LSM5	23658
ENSG00000117523	10278.8	-0.320076	0.0935022	-3.42319	0.000618912	0.0087394	PRRC2C	23215
ENSG00000163162	1087.38	0.485252	0.141903	3.4196	0.000627138	0.0088455	RNF149	284996
ENSG00000066379	410.395	0.723555	0.211625	3.41904	0.000628413	0.00885343	ZNRD1	30834
ENSG00000154582	936.552	0.465726	0.136269	3.41769	0.000631558	0.00888764	ELOC	6921
ENSG00000143320	4766.15	-0.412785	0.12079	-3.41737	0.000632298	0.00888797	CRABP2	1382
ENSG00000008735	166.454	-0.991245	0.290359	-3.41386	0.0006405	0.00898293	MAPK8IP2	23542
ENSG00000145860	683.003	0.513511	0.150417	3.41391	0.000640382	0.00898293	RNF145	153830
ENSG00000124155	2849.36	-0.36895	0.108176	-3.41063	0.00064812	0.00907954	PIGT	51604
ENSG00000239306	1740.76	-0.443357	0.130085	-3.4082	0.000653934	0.00915066	RBM14	10432
ENSG00000169856	73.0444	-1.42191	0.417326	-3.40718	0.000656371	0.00917442	ONECUT1	3175
ENSG00000117133	735.237	-0.485074	0.14243	-3.4057	0.000659941	0.0092036	RPF1	80135
ENSG00000137509	1265.05	0.442095	0.129812	3.40567	0.000660024	0.0092036	PRCP	5547
ENSG00000145220	1125.82	-0.438684	0.12882	-3.4054	0.000660684	0.0092036	LYAR	55646
ENSG00000130699	825.217	-0.505427	0.148535	-3.40276	0.000667098	0.00927216	TAF4	6874
ENSG00000153561	4517.31	0.369118	0.108476	3.40276	0.000667099	0.00927216	RMND5A	64795
ENSG00000114353	3072.96	-0.370005	0.108803	-3.40068	0.000672177	0.00933228	GNAI2	2771
ENSG00000168028	12912.4	0.410829	0.120865	3.39906	0.000676183	0.00936694	RPSA	3921
ENSG00000217165	454.882	0.636856	0.187352	3.39924	0.000675728	0.00936694
ENSG00000138180	2800.42	-0.362414	0.106732	-3.39555	0.00068492	0.00947741	CEP55	55165
ENSG00000170142	2045.77	0.452427	0.133498	3.38901	0.00070146	0.00969546	UBE2E1	7324
ENSG00000197375	1713.39	0.391717	0.115678	3.38628	0.000708481	0.00978161	SLC22A5	6584
ENSG00000137656	644.088	-0.508394	0.150148	-3.38595	0.000709315	0.00978224	BUD13	84811
ENSG00000134046	1359.28	-0.410759	0.121333	-3.38537	0.00071082	0.00979212	MBD2	8932
ENSG00000196313	1128.85	-0.443039	0.130943	-3.38344	0.000715833	0.00985025	POM121	9883
ENSG00000160213	2280.3	-0.43542	0.128787	-3.38093	0.000722401	0.00992962	CSTB	1476
ENSG00000100129	5480.85	0.326959	0.0967401	3.37976	0.000725484	0.00996095	EIF3L	51386
ENSG00000154059	1516.57	0.422144	0.124933	3.37895	0.000727631	0.0099794	IMPACT	55364
ENSG00000007080	1350.48	-0.55988	0.165745	-3.37796	0.000730255	0.0100043	CCDC124	115098
ENSG00000211456	946.109	0.450482	0.133433	3.3761	0.000735225	0.0100613	SACM1L	22908
ENSG00000113552	1516.67	0.398677	0.118119	3.37522	0.000737554	0.0100821	GNPDA1	10007
ENSG00000172794	206.371	-0.785709	0.232845	-3.37439	0.000739787	0.0101015	RAB37	326624
ENSG00000137073	1750.45	-0.405498	0.120242	-3.37234	0.000745333	0.010166	UBAP2	55833
ENSG00000107863	1259.67	-0.415816	0.123364	-3.37065	0.000749903	0.010212	ARHGAP21	57584
ENSG00000197563	1094.02	0.467183	0.13861	3.37049	0.000750351	0.010212	PIGN	23556
ENSG00000042493	397.603	0.596634	0.177235	3.36634	0.000761722	0.010355	CAPG	822
ENSG00000125651	2134.34	-0.376198	0.111762	-3.36605	0.000762525	0.010355	GTF2F1	2962
ENSG00000139514	5956.07	-0.328894	0.0977941	-3.36312	0.000770659	0.0104426	SLC7A1	6541
ENSG00000176396	252.219	0.725687	0.215771	3.36323	0.000770366	0.0104426	EID2	163126
ENSG00000134107	784.898	-0.480118	0.142815	-3.36182	0.00077431	0.0104806	BHLHE40	8553
ENSG00000092931	567.027	0.527662	0.157	3.36092	0.000776846	0.0105035	MFSD11	79157
ENSG00000253103	246.37	-0.732477	0.217966	-3.36051	0.000777998	0.0105076	LINC01609	101927487
ENSG00000111676	3927.73	-0.434803	0.129438	-3.35916	0.000781804	0.0105476	ATN1	1822
ENSG00000116127	1880.46	-0.40597	0.120943	-3.3567	0.00078878	0.0106301	ALMS1	7840
ENSG00000143799	5503.82	-0.320439	0.0955145	-3.35487	0.000794011	0.010689	PARP1	142
ENSG00000064666	1316.23	0.434842	0.129641	3.3542	0.000795942	0.0107034	CNN2	1265
ENSG00000137449	202.999	0.796365	0.237599	3.35172	0.0008031	0.0107871	CPEB2	132864
ENSG00000162194	1299.26	-0.438824	0.130936	-3.35145	0.000803902	0.0107871	LBHD1	79081
ENSG00000163605	1831.55	0.439554	0.13118	3.35077	0.000805885	0.010802	PPP4R2	151987
ENSG00000196531	8919.75	0.345344	0.103109	3.34931	0.000810139	0.0108473	NACA	4666
ENSG00000172057	898.163	0.460515	0.137547	3.34806	0.00081378	0.0108726	ORMDL3	94103
ENSG00000185298	1184.47	-0.470309	0.14046	-3.34836	0.000812928	0.0108726	CCDC137	339230
ENSG00000072571	2441.74	-0.405753	0.121274	-3.34576	0.00082056	0.0109407	HMMR	3161
ENSG00000104980	1135.66	-0.424997	0.127036	-3.3455	0.000821352	0.0109407	TIMM44	10469
ENSG00000171067	1012.41	-0.449798	0.134451	-3.34544	0.000821524	0.0109407	C11orf24	53838
ENSG00000006047	1669.15	-0.413969	0.123789	-3.34414	0.000825368	0.0109801	YBX2	51087
ENSG00000103187	640.92	-0.530147	0.158616	-3.34232	0.000830801	0.0110174	COTL1	23406
ENSG00000141127	970.661	0.448159	0.134084	3.34237	0.00083067	0.0110174	PRPSAP2	5636
ENSG00000263244	700.293	0.503645	0.150694	3.34217	0.000831251	0.0110174
ENSG00000264577	71.8485	1.37002	0.409939	3.34202	0.000831717	0.0110174
ENSG00000141424	13233.7	-0.330194	0.0988718	-3.33962	0.000838929	0.011101	SLC39A6	25800
ENSG00000133935	1954.51	-0.392067	0.117448	-3.33823	0.000843143	0.0111449	ERG28	11161
ENSG00000198001	1083.14	0.446643	0.133975	3.33379	0.000856716	0.0113123	IRAK4	51135
ENSG00000157303	1145.89	-0.456904	0.13709	-3.33288	0.000859508	0.0113371	SUSD3	203328
ENSG00000138071	9086.1	0.408221	0.122532	3.33156	0.000863618	0.0113792	ACTR2	10097
ENSG00000126803	204.9	-0.789897	0.237294	-3.32877	0.000872302	0.0114693	HSPA2	3306
ENSG00000153485	472.377	0.552006	0.165816	3.32902	0.000871522	0.0114693	TMEM251	26175
ENSG00000213614	811.241	0.47167	0.141748	3.32753	0.000876206	0.0114963	HEXA	3073
ENSG00000263272	157.253	0.870329	0.261541	3.3277	0.000875662	0.0114963
ENSG00000147996	113.594	1.02564	0.30856	3.32395	0.000887524	0.0116325	CBWD5	220869
ENSG00000134294	11722.3	0.375277	0.112914	3.32355	0.000888785	0.0116367	SLC38A2	54407
ENSG00000005700	2039.07	0.422992	0.127358	3.32128	0.000896061	0.0117196	IBTK	25998
ENSG00000143977	1506.79	0.441194	0.132858	3.32079	0.000897646	0.011728	SNRPG	6637
ENSG00000123908	1232.69	-0.458569	0.138192	-3.31834	0.000905527	0.0118061	AGO2	27161
ENSG00000126267	3696.61	0.373756	0.112627	3.31853	0.000904916	0.0118061	COX6B1	1340
ENSG00000168216	598.153	0.532338	0.160495	3.31685	0.000910373	0.0118568	LMBRD1	55788
ENSG00000159259	555.286	-0.522386	0.157539	-3.31592	0.000913422	0.0118841	CHAF1B	8208
ENSG00000136295	1702.8	-0.510476	0.154125	-3.3121	0.000925993	0.012035	TTYH3	80727
ENSG00000146701	10990.9	-0.328742	0.0992984	-3.31064	0.000930814	0.012085	MDH2	4191
ENSG00000122565	7903.18	0.39856	0.120481	3.30808	0.00093938	0.0121835	CBX3	11335
ENSG00000077454	2667.82	-0.470166	0.142153	-3.30747	0.000941433	0.0121912	LRCH4	4034
ENSG00000139684	4663.55	0.383771	0.116037	3.30732	0.000941938	0.0121912	ESD	2098
ENSG00000213123	94.7134	1.09676	0.331688	3.30661	0.000944322	0.0122093	TCTEX1D2	255758
ENSG00000118680	18877.2	0.322315	0.0974928	3.30604	0.000946255	0.0122216	MYL12B	103910
ENSG00000131016	415.486	-0.59248	0.179251	-3.30531	0.000948702	0.0122316	AKAP12	9590
ENSG00000149428	4639.77	-0.335355	0.101462	-3.30523	0.000949	0.0122316	HYOU1	10525
ENSG00000090263	1259.87	0.457024	0.138344	3.30353	0.000954766	0.0122574	MRPS33	51650
ENSG00000118058	5557.55	-0.329101	0.0996299	-3.30324	0.000955762	0.0122574	KMT2A	4297
ENSG00000151208	3284.53	-0.373567	0.113085	-3.30342	0.000955141	0.0122574	DLG5	9231
ENSG00000169567	6341.12	0.369602	0.111893	3.30318	0.000955944	0.0122574	HINT1	3094
ENSG00000182093	1714.1	0.412585	0.124866	3.30421	0.000952433	0.0122574	WRB	7485
ENSG00000125503	1287.1	-0.50427	0.152763	-3.30099	0.000963458	0.0123283	PPP1R12C	54776
ENSG00000171135	1173.24	0.441722	0.133815	3.30099	0.000963442	0.0123283	JAGN1	84522
ENSG00000081307	954.245	0.461652	0.139872	3.30053	0.000965036	0.0123358	UBA5	79876
ENSG00000075275	3950.11	-0.385181	0.116731	-3.29973	0.00096778	0.0123581	CELSR1	9620
ENSG00000186111	712.012	-0.521374	0.158034	-3.29912	0.000969874	0.0123721	PIP5K1C	23396
ENSG00000114850	3850.63	0.361839	0.109779	3.29606	0.000980524	0.0124951	SSR3	6747
ENSG00000164715	3356.22	-0.345884	0.10498	-3.29474	0.000985111	0.0125383	LMTK2	22853
ENSG00000228474	1093.04	-0.444215	0.134835	-3.29451	0.000985928	0.0125383	OST4	100128731
ENSG00000116473	1445.32	0.427832	0.129898	3.29361	0.000989112	0.0125636	RAP1A	5906
ENSG00000142599	1867.4	-0.3882	0.117873	-3.29337	0.000989946	0.0125636	RERE	473
ENSG00000130311	567.077	-0.511164	0.155273	-3.29203	0.000994677	0.0126028	DDA1	79016
ENSG00000168439	8118.72	-0.307841	0.0935141	-3.29192	0.000995065	0.0126028	STIP1	10963
ENSG00000185340	809.281	-0.63652	0.193406	-3.29111	0.000997915	0.012626	GAS2L1	10634
ENSG00000180304	2638.93	0.360454	0.109579	3.28943	0.00100391	0.0126889	OAZ2	4947
ENSG00000031823	992.016	-0.444294	0.135114	-3.28829	0.00100798	0.0127274	RANBP3	8498
ENSG00000139197	1551.13	0.390316	0.118795	3.28562	0.00101759	0.0128352	PEX5	5830
ENSG00000229644	272.198	-0.67233	0.204645	-3.28534	0.00101859	0.0128352
ENSG00000087842	778.27	0.481573	0.146662	3.28356	0.00102504	0.0129035	PIR	8544
ENSG00000065328	1404.15	-0.393928	0.119987	-3.28309	0.00102677	0.0129121	MCM10	55388
ENSG00000090266	1566	0.390822	0.119072	3.28224	0.00102985	0.0129378	NDUFB2	4708
ENSG00000159216	747.979	0.472102	0.143865	3.28155	0.00103237	0.0129564	RUNX1	861
ENSG00000164603	834.242	0.48676	0.148347	3.28123	0.00103356	0.0129581	BMT2	154743
ENSG00000197782	511.733	0.53793	0.164006	3.27993	0.00103832	0.0130047	ZNF780A	284323
ENSG00000088256	1357.48	-0.495516	0.151155	-3.2782	0.00104471	0.0130716	GNA11	2767
ENSG00000090447	614.901	-0.49695	0.151704	-3.27578	0.00105372	0.0131078	TFAP4	7023
ENSG00000112715	1377.39	-0.403641	0.123175	-3.27698	0.00104924	0.0131078	VEGFA	7422
ENSG00000143321	17624.5	-0.312577	0.0954225	-3.27572	0.00105394	0.0131078	HDGF	3068
ENSG00000160124	516.26	-0.556032	0.169725	-3.27609	0.00105257	0.0131078	CCDC58	131076
ENSG00000164118	443.372	0.631801	0.192849	3.27615	0.00105234	0.0131078	CEP44	80817
ENSG00000214456	374.999	-0.693517	0.211665	-3.27649	0.00105105	0.0131078	PLIN5	440503
ENSG00000186908	1279.26	0.43156	0.131786	3.27469	0.00105778	0.0131423	ZDHHC17	23390
ENSG00000151135	1383.87	0.417828	0.127624	3.2739	0.00106075	0.0131661	TMEM263	90488
ENSG00000111358	1066.16	0.447743	0.13683	3.27226	0.00106691	0.0132293	GTF2H3	2967
ENSG00000120696	927.134	0.455913	0.139428	3.26989	0.0010759	0.0133275	KBTBD7	84078
ENSG00000010292	5630.61	-0.32178	0.0984277	-3.2692	0.00107852	0.0133465	NCAPD2	9918
ENSG00000130164	3485.76	-0.335663	0.10279	-3.26553	0.00109259	0.0135072	LDLR	3949
ENSG00000104859	947.376	-0.501241	0.153573	-3.26385	0.00109909	0.0135471	CLASRP	11129
ENSG00000116221	2320.18	-0.362444	0.11104	-3.26408	0.00109822	0.0135471	MRPL37	51253
ENSG00000133226	2288.82	-0.369588	0.113221	-3.2643	0.00109734	0.0135471	SRRM1	10250
ENSG00000129473	508.539	0.523783	0.160528	3.26288	0.00110286	0.0135801	BCL2L2	599
ENSG00000127616	6688.2	-0.397719	0.121936	-3.26171	0.00110743	0.0136228	SMARCA4	6597
ENSG00000137801	1341.82	-0.412624	0.126555	-3.26043	0.00111242	0.0136707	THBS1	7057
ENSG00000163993	68.4568	1.26689	0.388726	3.25908	0.00111773	0.0137088	S100P	6286
ENSG00000186174	3980.51	-0.421005	0.129178	-3.25912	0.00111759	0.0137088	BCL9L	283149
ENSG00000223768	262.331	0.708232	0.21737	3.25818	0.0011213	0.013739
ENSG00000090013	1959.24	0.369811	0.11357	3.25624	0.00112898	0.0138194	BLVRB	645
ENSG00000225840	305.056	-0.652692	0.200465	-3.25589	0.00113036	0.0138227
ENSG00000119396	4055.19	0.337603	0.10371	3.25527	0.00113285	0.0138317	RAB14	51552
ENSG00000123200	5354.37	-0.338045	0.103849	-3.25515	0.00113333	0.0138317	ZC3H13	23091
ENSG00000153250	1023.84	0.418557	0.128657	3.25327	0.00114086	0.01391	RBMS1	5937
ENSG00000101191	3557.22	-0.392117	0.120557	-3.25255	0.00114375	0.0139179	DIDO1	11083
ENSG00000103194	4673.46	-0.334932	0.102971	-3.25269	0.00114316	0.0139179	USP10	9100
ENSG00000136444	1313.89	0.399776	0.122971	3.25099	0.00115003	0.0139806	RSAD1	55316
ENSG00000019144	630.319	-0.510239	0.157061	-3.24867	0.00115948	0.0140816	PHLDB1	23187
ENSG00000131966	1464.97	0.459142	0.141379	3.24759	0.00116386	0.014121	ACTR10	55860
ENSG00000164687	208.809	0.780117	0.240285	3.24663	0.00116779	0.0141549	FABP5	2171
ENSG00000039068	15482.4	-0.304682	0.093906	-3.24454	0.00117639	0.0142421	CDH1	999
ENSG00000065135	4026.83	0.344553	0.106201	3.24433	0.00117728	0.0142421	GNAI3	2773
ENSG00000042286	735.436	0.477115	0.147085	3.24381	0.00117944	0.0142544	AIFM2	84883
ENSG00000043093	1829.26	0.440914	0.135986	3.24235	0.00118548	0.0142924	DCUN1D1	54165
ENSG00000143556	72.5401	-1.23332	0.380394	-3.24222	0.00118604	0.0142924	S100A7	6278
ENSG00000151846	52.3822	1.47658	0.455404	3.24236	0.00118546	0.0142924	PABPC3	5042
ENSG00000070669	2259.01	0.382053	0.117863	3.2415	0.00118902	0.0143144	ASNS	440
ENSG00000104341	9829.19	0.296346	0.0914521	3.24045	0.00119341	0.0143533	LAPTM4B	55353
ENSG00000156976	6787.09	0.312656	0.0964945	3.24015	0.00119468	0.0143547	EIF4A2	1974
ENSG00000087191	5149.09	0.319961	0.0987871	3.2389	0.00119993	0.0144038	PSMC5	5705
ENSG00000169213	121.535	-1.03679	0.3203	-3.23694	0.0012082	0.014486	RAB3B	5865
ENSG00000186480	5291.86	-0.328867	0.101605	-3.23672	0.00120911	0.014486	INSIG1	3638
ENSG00000119801	870.241	0.481686	0.148872	3.23558	0.00121397	0.0145302	YPEL5	51646
ENSG00000100075	3050.39	-0.426415	0.131849	-3.23412	0.0012202	0.0145906	SLC25A1	6576
ENSG00000124535	2929.2	-0.350841	0.108505	-3.23342	0.00122319	0.0145983	WRNIP1	56897
ENSG00000164309	287.333	-0.653971	0.202247	-3.23353	0.00122271	0.0145983	CMYA5	202333
ENSG00000109685	6559.48	-0.310598	0.0960821	-3.23264	0.00122654	0.0146242	NSD2	7468
ENSG00000168269	135.892	-0.899714	0.27867	-3.2286	0.00124398	0.0148179	FOXI1	2299
ENSG00000100612	1064.49	0.415241	0.128681	3.22689	0.00125142	0.0148923	DHRS7	51635
ENSG00000081842	628.139	-0.530773	0.164572	-3.22517	0.00125897	0.0149678	PCDHA6	56142
ENSG00000113532	352.18	0.610034	0.189509	3.21902	0.0012863	0.0152781	ST8SIA4	7903
ENSG00000106588	287.856	0.692427	0.215233	3.2171	0.00129493	0.0152879	PSMA2	5683
ENSG00000129810	824.943	-0.440732	0.136981	-3.21747	0.00129328	0.0152879	SGO1	151648
ENSG00000164253	1130.64	0.407053	0.12652	3.21729	0.00129407	0.0152879	WDR41	55255
ENSG00000166295	2011.04	0.391356	0.121646	3.21718	0.00129458	0.0152879	ANAPC16	119504
ENSG00000167548	7463.23	-0.340525	0.105854	-3.21692	0.00129575	0.0152879	KMT2D	8085
ENSG00000173486	614.734	-0.566415	0.176023	-3.21784	0.00129159	0.0152879	FKBP2	2286
ENSG00000254685	251.099	0.727761	0.226158	3.21793	0.0012912	0.0152879	FPGT	8790
ENSG00000116954	570.81	0.499987	0.15548	3.21577	0.00130096	0.0153348	RRAGC	64121
ENSG00000204569	2629.52	-0.350123	0.109053	-3.21058	0.00132468	0.0155996	PPP1R10	5514
ENSG00000145808	1457.64	-0.395669	0.123284	-3.20942	0.00133003	0.0156181	ADAMTS19	171019
ENSG00000198700	3703.95	-0.321495	0.100156	-3.20995	0.00132759	0.0156181	IPO9	55705
ENSG00000205744	383.372	0.579313	0.180499	3.2095	0.00132964	0.0156181	DENND1C	79958
ENSG00000169607	681.949	-0.47278	0.147339	-3.2088	0.00133291	0.0156371	CKAP2L	150468
ENSG00000173542	1189.69	0.458186	0.142804	3.2085	0.0013343	0.0156387	MOB1B	92597
ENSG00000124762	3805.55	0.360411	0.112345	3.20808	0.00133623	0.0156465	CDKN1A	1026
ENSG00000103550	1116.73	-0.421739	0.131486	-3.2075	0.00133896	0.0156637	KNOP1	400506
ENSG00000134830	721.299	0.476796	0.148737	3.20564	0.00134761	0.01575	C5AR2	27202
ENSG00000139168	1990.35	-0.363879	0.113524	-3.20529	0.00134926	0.0157545	ZCRB1	85437
ENSG00000062716	7347.41	0.338754	0.105838	3.20067	0.00137109	0.015977	VMP1	81671
ENSG00000186566	2351.56	-0.3471	0.10844	-3.20085	0.00137021	0.015977	GPATCH8	23131
ENSG00000248360	512.456	-0.563013	0.175917	-3.20044	0.00137218	0.015977	LINC00504	201853
ENSG00000166855	2127.74	0.358853	0.112241	3.19716	0.0013879	0.0161449	CLPX	10845
ENSG00000102218	297.705	0.65993	0.20644	3.19672	0.00139001	0.0161543	RP2	6102
ENSG00000007168	2981.69	0.356167	0.111463	3.19539	0.00139641	0.0162136	PAFAH1B1	5048
ENSG00000122958	2119.77	0.406213	0.127166	3.19436	0.0014014	0.0162413	VPS26A	9559
ENSG00000171863	8338.64	0.419032	0.131179	3.19436	0.00140142	0.0162413	RPS7	6201
ENSG00000213341	1788.49	0.38197	0.119735	3.19012	0.00142214	0.016466	CHUK	1147
ENSG00000170448	669.06	0.467457	0.146551	3.18973	0.00142404	0.0164727	NFXL1	152518
ENSG00000224531	889.425	0.443247	0.138986	3.18914	0.00142696	0.0164911	SMIM13	221710
ENSG00000140332	2625.29	-0.404538	0.126881	-3.18834	0.00143094	0.0165063	TLE3	7090
ENSG00000257727	198.941	0.745778	0.233908	3.18834	0.00143091	0.0165063	CNPY2	10330
ENSG00000105229	907.019	-0.49941	0.156744	-3.18614	0.00144184	0.0166167	PIAS4	51588
ENSG00000065717	413.856	-0.585797	0.183895	-3.18549	0.00144507	0.0166384	TLE2	7089
ENSG00000135241	2308.65	0.42767	0.134273	3.18508	0.00144712	0.0166466	PNPLA8	50640
ENSG00000102471	968.032	0.436272	0.137019	3.18402	0.00145243	0.0166821	NDFIP2	54602
ENSG00000205890	177.904	0.782778	0.245853	3.18393	0.0014529	0.0166821	LOC100128770	100128770
ENSG00000188566	750.667	-0.541504	0.170129	-3.1829	0.00145808	0.0167261	NDOR1	27158
ENSG00000004059	4362.74	-0.371216	0.116673	-3.18168	0.00146424	0.0167813	ARF5	381
ENSG00000014164	662.463	-0.544002	0.171011	-3.1811	0.00146715	0.0167837	ZC3H3	23144
ENSG00000120833	236.413	-0.690048	0.21691	-3.18126	0.00146635	0.0167837	SOCS2	8835
ENSG00000108175	2716.93	-0.384668	0.120941	-3.18062	0.00146959	0.016796	ZMIZ1	57178
ENSG00000116667	794.02	-0.46314	0.145686	-3.17904	0.00147763	0.0168725	C1orf21	81563
ENSG00000111726	1570.02	0.384969	0.121195	3.17644	0.00149093	0.0170087	CMAS	55907
ENSG00000167965	1258.47	-0.441559	0.139027	-3.17607	0.00149285	0.0170149	MLST8	64223
ENSG00000091140	9828.62	0.353272	0.111247	3.17558	0.00149539	0.0170282	DLD	1738
ENSG00000204673	2279.5	-0.445825	0.140508	-3.17295	0.00150898	0.0171673	AKT1S1	84335
ENSG00000169992	1584.57	-0.415264	0.130906	-3.17223	0.00151273	0.0171942	NLGN2	57555
ENSG00000170892	2061.8	-0.479478	0.151172	-3.17175	0.00151524	0.0172069	TSEN34	79042
ENSG00000149679	896.36	-0.432885	0.136522	-3.17081	0.00152017	0.0172389	CABLES2	81928
ENSG00000176623	2496.38	0.353449	0.111474	3.17068	0.00152083	0.0172389	RMDN1	51115
ENSG00000123080	371.459	-0.692854	0.218653	-3.16874	0.00153102	0.0173386	CDKN2C	1031
ENSG00000115241	6769.75	-0.299188	0.0945392	-3.1647	0.00155245	0.0175118	PPM1G	5496
ENSG00000143621	11522.6	-0.296757	0.0937454	-3.16556	0.00154783	0.0175118	ILF2	3608
ENSG00000148634	1617.08	0.4254	0.134428	3.16452	0.00155337	0.0175118	HERC4	26091
ENSG00000156110	2064.81	0.361387	0.114173	3.16525	0.00154948	0.0175118	ADK	132
ENSG00000168488	4640.74	-0.358101	0.113154	-3.16473	0.00155227	0.0175118	ATXN2L	11273
ENSG00000177666	971.685	-0.58403	0.184596	-3.16382	0.00155714	0.0175383	PNPLA2	57104
ENSG00000074370	4608.31	-0.337387	0.10665	-3.16351	0.00155881	0.0175412	ATP2A3	489
ENSG00000168763	1766.55	-0.36324	0.114842	-3.16296	0.00156174	0.0175583	CNNM3	26505
ENSG00000142945	1624.79	-0.362443	0.114607	-3.16249	0.00156428	0.0175709	KIF2C	11004
ENSG00000198901	6383.52	-0.306441	0.0969401	-3.16114	0.00157155	0.0176366	PRC1	9055
ENSG00000131462	2528.28	-0.335307	0.106169	-3.15825	0.00158717	0.0177958	TUBG1	7283
ENSG00000112183	547.225	-0.502303	0.159256	-3.15406	0.00161016	0.0180372	RBM24	221662
ENSG00000143947	5902.28	0.967147	0.30676	3.15278	0.00161724	0.0181003	RPS27A	6233
ENSG00000124788	737.145	0.448547	0.142301	3.15211	0.00162097	0.0181257	ATXN1	6310
ENSG00000143549	9351.29	-0.304111	0.0965032	-3.1513	0.00162545	0.0181594	TPM3	7170
ENSG00000182831	1763.32	0.361008	0.114607	3.14995	0.00163296	0.0182269	C16orf72	29035
ENSG00000134504	596.657	-0.489014	0.155275	-3.14934	0.00163639	0.0182488	KCTD1	284252
ENSG00000123836	703.624	0.470059	0.149271	3.14904	0.00163807	0.0182511	PFKFB2	5208
ENSG00000123374	2118.03	-0.343022	0.109056	-3.14537	0.00165879	0.0184488	CDK2	1017
ENSG00000162063	1835.83	-0.358366	0.113932	-3.14544	0.00165838	0.0184488	CCNF	899
ENSG00000168675	172.344	-0.790494	0.25136	-3.14486	0.00166166	0.0184643	LDLRAD4	753
ENSG00000118482	2497.5	-0.35055	0.111484	-3.14439	0.00166432	0.0184772	PHF3	23469
ENSG00000164442	481.59	-0.561861	0.178711	-3.14397	0.00166672	0.0184873	CITED2	10370
ENSG00000177570	785.054	0.451048	0.143564	3.14179	0.0016792	0.0186091	SAMD12	401474
ENSG00000175166	9743.37	0.300393	0.0956747	3.13974	0.001691	0.0187231	PSMD2	5708
ENSG00000080603	7545.85	-0.320586	0.102157	-3.13816	0.00170011	0.0188073	SRCAP	10847
ENSG00000164920	279.196	-0.66855	0.213089	-3.13743	0.00170437	0.0188377	OSR2	116039
ENSG00000169083	1042.31	-0.409893	0.130665	-3.13698	0.001707	0.0188499	AR	367
ENSG00000133884	1890.7	-0.369927	0.118026	-3.13427	0.00172282	0.0190077	DPF2	5977
ENSG00000127334	1619.14	0.365568	0.116667	3.13342	0.00172782	0.0190459	DYRK2	8445
ENSG00000183963	1672.37	-0.441128	0.14095	-3.12968	0.00175	0.0192732	SMTN	6525
ENSG00000008018	4548.54	0.31734	0.101421	3.12895	0.00175434	0.019304	PSMB1	5689
ENSG00000021355	825.255	0.428222	0.136898	3.12803	0.00175983	0.0193472	SERPINB1	1992
ENSG00000063978	2813.69	-0.327306	0.104655	-3.12749	0.00176307	0.0193657	RNF4	6047
ENSG00000176014	1835.24	-0.418027	0.133752	-3.1254	0.00177565	0.0194695	TUBB6	84617
ENSG00000246263	169.474	0.79651	0.254851	3.1254	0.00177566	0.0194695	UBR5-AS1	101927221
ENSG00000122912	292.066	0.621054	0.198866	3.12297	0.00179036	0.0196133	SLC25A16	8034
ENSG00000104885	1212.18	-0.560005	0.179344	-3.12252	0.00179313	0.0196264	DOT1L	84444
ENSG00000131669	2911.92	-0.358789	0.114922	-3.12202	0.00179614	0.0196309	NINJ1	4814
ENSG00000150787	358.61	0.590656	0.189196	3.12193	0.00179671	0.0196309	PTS	5805
ENSG00000172977	804.887	-0.442645	0.141907	-3.11925	0.00181311	0.0197927	KAT5	10524
ENSG00000100364	916.058	-0.423176	0.135716	-3.1181	0.00182023	0.019853	KIAA0930	23313
ENSG00000142731	1286.45	-0.380927	0.122369	-3.11293	0.00185238	0.0201859	PLK4	10733
ENSG00000128567	1648.11	-0.363506	0.116794	-3.11237	0.00185592	0.020189	PODXL	5420
ENSG00000196449	382.792	0.559176	0.179656	3.11249	0.00185518	0.020189	YRDC	79693
ENSG00000039650	896.285	-0.438826	0.141168	-3.10854	0.00188015	0.0204346	PNKP	11284
ENSG00000103653	3003.76	0.331965	0.106925	3.10465	0.00190504	0.020669	CSK	1445
ENSG00000104738	7219.74	-0.292427	0.0941848	-3.10482	0.00190393	0.020669	MCM4	4173
ENSG00000139629	3213.14	0.323281	0.104138	3.10434	0.00190702	0.0206724	GALNT6	11226
ENSG00000161021	3867.48	-0.315653	0.101718	-3.10321	0.00191437	0.020734	MAML1	9794
ENSG00000119661	691.85	0.4734	0.152582	3.10259	0.00191836	0.0207497	DNAL1	83544
ENSG00000158270	177.991	-0.784109	0.252758	-3.10221	0.00192084	0.0207497	COLEC12	81035
ENSG00000178307	977.122	-0.422481	0.136186	-3.10223	0.00192072	0.0207497	TMEM11	8834
ENSG00000151553	1032.03	0.428887	0.138265	3.10192	0.00192269	0.0207517	FAM160B1	57700
ENSG00000104979	1334.04	-0.38583	0.124414	-3.10119	0.00192746	0.0207851	C19orf53	28974
ENSG00000163584	1390.19	0.464623	0.149834	3.10092	0.00192923	0.0207861	RPL22L1	200916
ENSG00000168769	3526.49	-0.314067	0.101316	-3.09987	0.00193608	0.0208419	TET2	54790
ENSG00000136052	261.144	0.665121	0.214764	3.09699	0.00195497	0.0210088	SLC41A2	84102
ENSG00000175970	1520.6	0.364755	0.11777	3.09718	0.00195368	0.0210088	UNC119B	84747
ENSG00000164128	10796.3	-0.315663	0.101949	-3.09629	0.00195961	0.0210404	NPY1R	4886
ENSG00000196975	2063.99	0.341876	0.110425	3.09599	0.00196159	0.0210435	ANXA4	307
ENSG00000164022	1701.42	0.401786	0.12982	3.09495	0.00196844	0.0210987	AIMP1	9255
ENSG00000066230	52.3661	1.54948	0.500806	3.09397	0.00197501	0.0211144	SLC9A3	6550
ENSG00000109184	1339.53	0.408549	0.132046	3.094	0.00197479	0.0211144	DCUN1D4	23142
ENSG00000117399	2257.3	-0.352249	0.113838	-3.09429	0.00197281	0.0211144	CDC20	991
ENSG00000203791	175.978	0.784325	0.253539	3.09351	0.00197803	0.0211285	EEF1AKMT2	399818
ENSG00000260260	212.268	0.753586	0.243668	3.09268	0.00198359	0.0211696	SNHG19	100507303
ENSG00000173456	1400.17	-0.374673	0.121173	-3.09204	0.00198783	0.0211967	RNF26	79102
ENSG00000205138	349.215	-0.647149	0.20946	-3.08961	0.00200422	0.0213531	SDHAF1	644096
ENSG00000078246	1250.26	-0.382241	0.123756	-3.08866	0.00201064	0.0213689	TULP3	7289
ENSG00000118707	2855.48	-0.327628	0.106076	-3.08862	0.00201087	0.0213689	TGIF2	60436
ENSG00000153815	1143.89	-0.422724	0.13685	-3.08896	0.00200858	0.0213689	CMIP	80790
ENSG00000161682	468.388	-0.63643	0.206105	-3.08789	0.00201585	0.0214035	FAM171A2	284069
ENSG00000099341	4389.58	-0.302346	0.0979604	-3.08641	0.0020259	0.0214919	PSMD8	5714
ENSG00000167863	1845.07	0.37702	0.122172	3.08599	0.00202878	0.021504	ATP5H	10476
ENSG00000126003	1406.03	-0.406412	0.131718	-3.08548	0.00203226	0.0215225	PLAGL2	5326
ENSG00000136574	79.3332	-1.10388	0.357891	-3.0844	0.00203961	0.021578	GATA4	2626
ENSG00000138698	1009.59	0.40915	0.13266	3.0842	0.00204097	0.021578	RAP1GDS1	5910
ENSG00000096070	3719.57	-0.319337	0.103581	-3.08296	0.00204951	0.0216498	BRPF3	27154
ENSG00000228594	425.353	-0.667578	0.216558	-3.08267	0.00205151	0.0216525	FNDC10	643988
ENSG00000152137	6385.36	-0.297291	0.0964477	-3.08241	0.00205335	0.0216535	HSPB8	26353
ENSG00000105364	1408.92	-0.469973	0.152626	-3.07924	0.00207531	0.021865	MRPL4	51073
ENSG00000144724	542.793	-0.488846	0.158767	-3.079	0.00207693	0.021865	PTPRG	5793
ENSG00000069188	196.406	-0.731522	0.237686	-3.07768	0.00208616	0.0219435	SDK2	54549
ENSG00000166477	5164.5	-0.305991	0.0994771	-3.07599	0.00209802	0.0220497	LEO1	123169
ENSG00000166479	419.115	0.600507	0.195352	3.07397	0.00211232	0.0221812	TMX3	54495
ENSG00000196247	1307.95	-0.402612	0.131057	-3.07203	0.00212606	0.0223065	ZNF107	51427
ENSG00000178053	314.516	0.620141	0.201906	3.07143	0.00213034	0.0223326	MLF1	4291
ENSG00000122140	1650.27	-0.46841	0.152535	-3.07084	0.00213455	0.0223579	MRPS2	51116
ENSG00000117289	7865.15	-0.329167	0.10723	-3.06972	0.00214262	0.0224078
ENSG00000136819	1924.61	-0.341172	0.111143	-3.06967	0.00214293	0.0224078	C9orf78	51759
ENSG00000073111	4070.53	-0.344709	0.112313	-3.06917	0.00214652	0.0224264	MCM2	4171
ENSG00000120533	2772.79	0.3772	0.12293	3.0684	0.00215208	0.0224656	ENY2	56943
ENSG00000163485	58.749	-1.29084	0.420958	-3.06644	0.00216624	0.0225944	ADORA1	134
ENSG00000084774	3876.92	-0.319221	0.104129	-3.06562	0.0021722	0.0226375	CAD	790
ENSG00000078140	3977.28	0.317858	0.10373	3.06429	0.00218187	0.0227193	UBE2K	3093
ENSG00000054179	369.382	-0.654253	0.213639	-3.06243	0.00219548	0.0228227	ENTPD2	954
ENSG00000183248	376.64	-0.59181	0.193242	-3.06253	0.00219472	0.0228227	PRR36	80164
ENSG00000130733	1323.8	-0.399584	0.130491	-3.06217	0.0021974	0.0228235	YIPF2	78992
ENSG00000099995	2737.88	-0.322486	0.105406	-3.05946	0.0022174	0.023012	SF3A1	10291
ENSG00000130731	705.385	-0.585246	0.191344	-3.0586	0.00222373	0.0230585	METTL26	84326
ENSG00000184640	4304.81	-0.330418	0.10805	-3.05802	0.00222802	0.0230836	SEPT9	10801
ENSG00000139651	1278.66	0.375949	0.122993	3.05667	0.00223811	0.0231495	ZNF740	283337
ENSG00000157014	1197.95	0.380542	0.124489	3.05684	0.00223682	0.0231495	TATDN2	9797
ENSG00000174371	879.611	-0.414902	0.135779	-3.05572	0.00224524	0.0232039	EXO1	9156
ENSG00000080819	465.737	0.505821	0.165653	3.0535	0.00226185	0.0233538	CPOX	1371
ENSG00000130347	212.349	0.709298	0.232412	3.05191	0.00227394	0.0233538	RTN4IP1	84816
ENSG00000133983	293.248	0.606864	0.198772	3.05307	0.00226517	0.0233538	COX16	51241
ENSG00000150687	1042.14	-0.409962	0.134314	-3.05226	0.00227127	0.0233538	PRSS23	11098
ENSG00000160211	18307.3	0.293645	0.0962069	3.05222	0.00227153	0.0233538	G6PD	2539
ENSG00000164930	3656.04	0.360094	0.117984	3.05206	0.00227276	0.0233538	FZD6	8323
ENSG00000177732	1098.1	-0.440319	0.144282	-3.05179	0.00227479	0.0233538	SOX12	6666
ENSG00000197746	11388.7	0.296882	0.0972699	3.05214	0.00227214	0.0233538	PSAP	5660
ENSG00000139636	541.048	0.491759	0.161162	3.05133	0.00227828	0.0233703	LMBR1L	55716
ENSG00000144815	544.113	0.528889	0.173399	3.05012	0.00228747	0.0234451	NXPE3	91775
ENSG00000149932	839.067	0.416968	0.136738	3.0494	0.00229299	0.0234823	TMEM219	124446
ENSG00000111530	10490.7	0.320129	0.104996	3.04898	0.00229623	0.0234961	CAND1	55832
ENSG00000089159	3195.19	-0.331894	0.108893	-3.04789	0.00230452	0.0235615	PXN	5829
ENSG00000130706	1532.54	-0.423427	0.13896	-3.04713	0.00231041	0.0236023	ADRM1	11047
ENSG00000101843	1365.63	0.384259	0.126157	3.04588	0.00232002	0.0236081	PSMD10	5716
ENSG00000115307	3369.67	-0.332663	0.109211	-3.04606	0.00231862	0.0236081	AUP1	550
ENSG00000115762	4622.78	0.303767	0.0997138	3.04639	0.00231608	0.0236081	PLEKHB2	55041
ENSG00000130382	638.307	-0.509022	0.167086	-3.04647	0.00231543	0.0236081	MLLT1	4298
ENSG00000162073	954.385	-0.465866	0.152953	-3.04582	0.00232049	0.0236081	PAQR4	124222
ENSG00000134109	1067.45	0.401743	0.131936	3.04498	0.00232699	0.0236549	EDEM1	9695
ENSG00000132613	810.826	-0.507955	0.166981	-3.04199	0.00235016	0.0238709	MTSS1L	92154
ENSG00000067704	4508.29	0.310618	0.102128	3.04147	0.00235428	0.0238927	IARS2	55699
ENSG00000119718	1487.48	-0.363273	0.119452	-3.04117	0.00235662	0.0238927	EIF2B2	8892
ENSG00000197223	393.422	0.597854	0.196599	3.04098	0.00235808	0.0238927	C1D	10438
ENSG00000111875	556.433	0.472465	0.15539	3.0405	0.00236184	0.0239028	ASF1A	25842
ENSG00000129195	776.09	-0.450933	0.148315	-3.04036	0.00236293	0.0239028	PIMREG	54478
ENSG00000120784	486.557	0.53085	0.174646	3.03958	0.00236909	0.0239455	ZFP30	22835
ENSG00000157224	1845.79	0.360619	0.118661	3.03907	0.00237309	0.0239665	CLDN12	9069
ENSG00000113575	5215.69	0.309862	0.101986	3.03828	0.00237936	0.0240102	PPP2CA	5515
ENSG00000186153	561.999	-0.477972	0.157496	-3.03482	0.00240679	0.0242674	WWOX	51741
ENSG00000136521	1448.07	0.376174	0.123997	3.03374	0.00241544	0.024315	NDUFB5	4711
ENSG00000165240	634.076	0.472595	0.155769	3.03395	0.00241378	0.024315	ATP7A	538
ENSG00000167460	8351.79	-0.28325	0.0934022	-3.03258	0.00242469	0.0243884	TPM4	7171
ENSG00000169783	280.291	-0.690116	0.227601	-3.03214	0.0024283	0.0244049	LINGO1	84894
ENSG00000173674	3952.64	0.315674	0.104191	3.02976	0.00244749	0.0245778	EIF1AX	1964
ENSG00000130005	476.799	-0.561478	0.185417	-3.02819	0.00246023	0.0246859	GAMT	2593
ENSG00000128059	1564.57	0.358025	0.118359	3.02492	0.002487	0.0249032	PPAT	5471
ENSG00000146409	306.245	0.602588	0.199215	3.02481	0.00248791	0.0249032	SLC18B1	116843
ENSG00000164742	664.104	-0.448392	0.148231	-3.02495	0.00248674	0.0249032	ADCY1	107
ENSG00000167397	508.871	-0.495971	0.163989	-3.02442	0.00249112	0.0249152	VKORC1	79001
ENSG00000198466	699.571	0.435367	0.144009	3.02319	0.00250127	0.0249966	ZNF587	84914
ENSG00000141140	2657.02	-0.330711	0.109473	-3.02095	0.00251985	0.0251418
ENSG00000148154	1126.63	0.456752	0.151184	3.02116	0.00251807	0.0251418	UGCG	7357
ENSG00000076351	138.732	-0.859725	0.284719	-3.01956	0.00253145	0.0252372	SLC46A1	113235
ENSG00000066583	2925.24	-0.321051	0.106354	-3.01868	0.00253876	0.0252898	ISOC1	51015
ENSG00000241431	169.316	-0.962124	0.31891	-3.01691	0.00255363	0.0254175
ENSG00000100372	844.177	0.416483	0.138147	3.01478	0.00257167	0.0255766	SLC25A17	10478
ENSG00000144331	113.392	-0.927583	0.307759	-3.01399	0.00257838	0.0256172	ZNF385B	151126
ENSG00000179632	2970.58	-0.331115	0.109866	-3.01381	0.00257988	0.0256172	MAF1	84232
ENSG00000127527	2022.94	-0.358473	0.119025	-3.01176	0.0025974	0.0257705	EPS15L1	58513
ENSG00000112146	2437	0.321342	0.106743	3.01044	0.00260866	0.0258409	FBXO9	26268
ENSG00000162430	843.333	-0.444145	0.147534	-3.01045	0.0026086	0.0258409	SELENON	57190
ENSG00000005483	4695.79	-0.310544	0.103195	-3.0093	0.00261853	0.025918	KMT2E	55904
ENSG00000115919	2458.56	0.356292	0.118448	3.00801	0.00262965	0.0260074	KYNU	8942
ENSG00000137812	1733.38	-0.380929	0.126655	-3.00761	0.00263307	0.0260204	KNL1	57082
ENSG00000064932	1559.93	-0.474099	0.157703	-3.00629	0.00264459	0.0261135	SBNO2	22904
ENSG00000111911	725.498	0.440455	0.146587	3.00473	0.00265814	0.0262264	HINT3	135114
ENSG00000164171	2399.64	-0.32576	0.108437	-3.00414	0.0026633	0.0262565	ITGA2	3673
ENSG00000066135	1676.41	0.358791	0.119479	3.00295	0.00267374	0.0263258	KDM4A	9682
ENSG00000169016	848.894	0.421388	0.140329	3.00286	0.00267458	0.0263258	E2F6	1876
ENSG00000129559	1122.21	0.388689	0.129485	3.00181	0.00268378	0.0263745	NEDD8	4738
ENSG00000165238	359.139	-0.622283	0.207288	-3.00203	0.00268186	0.0263745	WNK2	65268
ENSG00000203485	2066.94	-0.431823	0.143869	-3.0015	0.00268653	0.0263807	INF2	64423
ENSG00000115084	1482.44	0.356609	0.118878	2.99978	0.00270173	0.026509	SLC35F5	80255
ENSG00000173085	653.228	-0.462838	0.154307	-2.99946	0.00270457	0.0265159	COQ2	27235
ENSG00000214535	71.4876	1.16322	0.387938	2.99846	0.00271349	0.0265824
ENSG00000070087	3268.23	0.308973	0.103081	2.99739	0.00272306	0.026655	PFN2	5217
ENSG00000115963	237.213	0.675935	0.22555	2.99682	0.00272807	0.0266831	RND3	390
ENSG00000166275	180.787	0.759063	0.253344	2.99618	0.00273384	0.0267185	BORCS7	119032
ENSG00000079459	6580.11	-0.283039	0.0944991	-2.99515	0.00274306	0.0267664	FDFT1	2222
ENSG00000153208	110.421	-0.919737	0.307066	-2.99524	0.00274227	0.0267664	MERTK	10461
ENSG00000123091	2132.62	0.341966	0.114221	2.9939	0.00275433	0.0267887	RNF11	26994
ENSG00000149313	967.469	0.429109	0.143309	2.99429	0.00275085	0.0267887	AASDHPPT	60496
ENSG00000168701	683.456	0.469628	0.156871	2.99372	0.00275603	0.0267887	TMEM208	29100
ENSG00000235859	238.337	0.655516	0.218917	2.99436	0.00275019	0.0267887
ENSG00000270168	59.7703	1.23598	0.412858	2.9937	0.00275614	0.0267887
ENSG00000138660	1481.67	0.367632	0.122834	2.99293	0.00276316	0.026836	AP1AR	55435
ENSG00000109103	1821.09	-0.351234	0.117369	-2.99255	0.00276659	0.0268482	UNC119	9094
ENSG00000144218	213.408	-0.682843	0.228245	-2.99172	0.00277415	0.0269006	AFF3	3899
ENSG00000119596	4115.71	-0.298611	0.099846	-2.99072	0.00278323	0.0269676	YLPM1	56252
ENSG00000204256	14196.6	-0.290647	0.0972494	-2.98868	0.00280184	0.0271267	BRD2	6046
ENSG00000101557	3554.37	0.30347	0.101561	2.98804	0.0028077	0.0271623	USP14	9097
ENSG00000172795	3158.01	0.37363	0.125094	2.98679	0.00281926	0.0272529	DCP2	167227
ENSG00000100311	769.757	-0.427715	0.143218	-2.98647	0.00282218	0.0272599	PDGFB	5155
ENSG00000113141	4006.19	-0.325966	0.1092	-2.98505	0.00283534	0.0273657	IK	3550
ENSG00000198435	662.084	-0.466619	0.156481	-2.98195	0.00286416	0.0276223	NRARP	441478
ENSG00000165304	1376.49	-0.362719	0.121675	-2.98106	0.00287251	0.0276636	MELK	9833
ENSG00000255302	1435.9	0.429351	0.144028	2.98102	0.00287289	0.0276636	EID1	23741
ENSG00000011105	510.949	0.512198	0.17188	2.97997	0.00288274	0.0276833	TSPAN9	10867
ENSG00000072135	1850.69	-0.361374	0.121273	-2.97985	0.00288387	0.0276833	PTPN18	26469
ENSG00000184207	1038.01	-0.435462	0.146103	-2.98051	0.0028777	0.0276833	PGP	283871
ENSG00000185624	10796.1	-0.277766	0.0932125	-2.97992	0.00288326	0.0276833	P4HB	5034
ENSG00000175265	319.552	0.589416	0.198094	2.97544	0.00292571	0.0280633	GOLGA8A	23015
ENSG00000102144	7478.76	0.304748	0.10244	2.97491	0.00293078	0.0280902	PGK1	5230
ENSG00000166260	1036.96	0.403749	0.135803	2.97304	0.00294863	0.0282395	COX11	1353
ENSG00000015532	1003.4	-0.441207	0.148436	-2.97238	0.00295498	0.0282491	XYLT2	64132
ENSG00000136940	936.069	0.443649	0.149249	2.97254	0.00295345	0.0282491	PDCL	5082
ENSG00000162076	793.663	-0.464107	0.156148	-2.97223	0.00295646	0.0282491	FLYWCH2	114984
ENSG00000075945	694.124	0.45177	0.152032	2.97154	0.00296312	0.0282692	KIFAP3	22920
ENSG00000163964	1021.11	0.405644	0.136508	2.97157	0.00296277	0.0282692	PIGX	54965
ENSG00000099994	153.241	-0.855075	0.287779	-2.97129	0.00296555	0.0282705	SUSD2	56241
ENSG00000124160	1777.03	-0.352336	0.118589	-2.97105	0.00296781	0.0282705	NCOA5	57727
ENSG00000086504	2090.46	-0.340894	0.114786	-2.96984	0.00297958	0.0283174	MRPL28	10573
ENSG00000109066	703.364	-0.461573	0.155415	-2.96994	0.00297856	0.0283174	TMEM104	54868
ENSG00000110911	2230.19	0.346649	0.116717	2.96999	0.00297811	0.0283174	SLC11A2	4891
ENSG00000156218	270.561	-0.609666	0.205357	-2.96881	0.00298954	0.0283903	ADAMTSL3	57188
ENSG00000155189	1198.76	0.365986	0.123292	2.96845	0.00299307	0.0284022	AGPAT5	55326
ENSG00000109854	1126.69	0.389275	0.131191	2.96723	0.00300499	0.0284935	HTATIP2	10553
ENSG00000143771	637.931	0.466112	0.157101	2.96695	0.0030077	0.0284974	CNIH4	29097
ENSG00000188886	80.2343	1.05755	0.356586	2.96576	0.00301941	0.0285865	ASTL	431705
ENSG00000128654	1081.05	0.377708	0.127371	2.96541	0.0030228	0.0285968	MTX2	10651
ENSG00000143933	7789.12	0.340797	0.114957	2.96458	0.00303101	0.0286526	CALM2	805
ENSG00000077235	5925.24	-0.311673	0.105155	-2.96392	0.00303746	0.0286839	GTF3C1	2975
ENSG00000117862	1249.61	-0.367865	0.12412	-2.96377	0.00303894	0.0286839	TXNDC12	51060
ENSG00000257923	7224.12	-0.292953	0.0988745	-2.96288	0.00304779	0.0287456	CUX1	1523
ENSG00000166224	2703.95	0.324783	0.109681	2.96117	0.00306473	0.0288834	SGPL1	8879
ENSG00000100220	3206.24	0.308647	0.104248	2.96071	0.00306935	0.028905	RTCB	51493
ENSG00000162734	2573.37	-0.313737	0.105984	-2.96024	0.00307404	0.0289124	PEA15	8682
ENSG00000179933	1045.23	0.416738	0.140802	2.95975	0.00307893	0.0289124	C14orf119	55017
ENSG00000185507	152.963	-0.855765	0.28914	-2.95969	0.00307945	0.0289124	IRF7	3665
ENSG00000196923	1388.78	-0.467046	0.157784	-2.96004	0.00307602	0.0289124	PDLIM7	9260
ENSG00000168461	973.577	-0.408546	0.138053	-2.95934	0.00308296	0.0289234	RAB31	11031
ENSG00000137575	1072.58	0.427432	0.144504	2.95793	0.00309717	0.0290129	SDCBP	6386
ENSG00000157456	1746.84	-0.335613	0.113458	-2.95803	0.0030961	0.0290129	CCNB2	9133
ENSG00000156374	346.832	0.564305	0.190823	2.95721	0.00310438	0.0290585	PCGF6	84108
ENSG00000012048	2226.71	-0.330724	0.111867	-2.95641	0.00311239	0.0291115	BRCA1	672
ENSG00000171617	374.368	0.531377	0.179785	2.95563	0.00312028	0.0291582	ENC1	8507
ENSG00000176171	961.563	-0.459066	0.155328	-2.95546	0.00312208	0.0291582	BNIP3	664
ENSG00000167182	555.351	-0.505873	0.171335	-2.95254	0.00315167	0.0294125	SP2	6668
ENSG00000249859	568.63	0.467065	0.158287	2.95075	0.00317001	0.0295614	PVT1	5820
ENSG00000196850	1032.4	0.412507	0.139844	2.94978	0.00318005	0.0296327	PPTC7	160760
ENSG00000126790	343.661	0.573365	0.194428	2.94898	0.0031882	0.0296864	L3HYPDH	112849
ENSG00000099940	1248.54	-0.366504	0.124314	-2.94822	0.00319611	0.0297377	SNAP29	9342
ENSG00000119048	979.662	0.423272	0.143831	2.94284	0.00325218	0.0302367	UBE2B	7320
ENSG00000152332	5065.78	0.346933	0.117956	2.9412	0.00326941	0.0303711	UHMK1	127933
ENSG00000261061	303.818	-0.584256	0.198659	-2.941	0.00327153	0.0303711
ENSG00000153885	2281.73	-0.368637	0.125465	-2.93816	0.00330167	0.030628	KCTD15	79047
ENSG00000162104	1493.17	-0.352532	0.120013	-2.93745	0.00330928	0.0306757	ADCY9	115
ENSG00000094916	10525.4	-0.279903	0.0953441	-2.93572	0.00332775	0.0308239	CBX5	23468
ENSG00000102007	872.402	-0.431895	0.147133	-2.9354	0.00333121	0.0308329	PLP2	5355
ENSG00000155368	6044.19	-0.353655	0.120493	-2.93507	0.00333471	0.0308423	DBI	1622
ENSG00000119242	599.789	-0.479675	0.163541	-2.93305	0.00335647	0.0310025	CCDC92	80212
ENSG00000122643	830.328	0.407036	0.138778	2.933	0.00335702	0.0310025	NT5C3A	51251
ENSG00000125520	1622.21	-0.461249	0.157295	-2.93238	0.00336372	0.0310412	SLC2A4RG	56731
ENSG00000054118	4753.27	-0.308995	0.10539	-2.93192	0.00336877	0.0310648	THRAP3	9967
ENSG00000167972	3169.55	-0.327721	0.111826	-2.93064	0.00338259	0.0311691	ABCA3	21
ENSG00000012660	4414.31	-0.300613	0.102664	-2.92812	0.00341017	0.0313969	ELOVL5	60481
ENSG00000163141	190.841	0.704061	0.240465	2.92792	0.00341238	0.0313969	BNIPL	149428
ENSG00000143207	1618.64	0.361287	0.123429	2.92709	0.00342147	0.0314503	RFWD2	64326
ENSG00000188352	948.056	0.406614	0.138922	2.92693	0.00342325	0.0314503	FOCAD	54914
ENSG00000109118	1968.36	-0.342174	0.116984	-2.92496	0.003445	0.0316267	PHF12	57649
ENSG00000136143	933.205	0.416488	0.142424	2.92428	0.00345255	0.0316726	SUCLA2	8803
ENSG00000115866	2419.96	0.347605	0.118981	2.92152	0.0034833	0.0319311	DARS	1615
ENSG00000162616	173.077	0.7791	0.266719	2.92106	0.00348847	0.0319314	DNAJB4	11080
ENSG00000175348	780.096	0.412378	0.141168	2.9212	0.00348688	0.0319314	TMEM9B	56674
ENSG00000113648	6158.7	-0.29835	0.102161	-2.9204	0.00349586	0.0319754	H2AFY	9555
ENSG00000002919	504.314	0.491317	0.168336	2.91868	0.00351522	0.0321052	SNX11	29916
ENSG00000130725	1639.21	-0.389483	0.133438	-2.91884	0.00351335	0.0321052	UBE2M	9040
ENSG00000213639	4952.41	0.352588	0.120915	2.91599	0.0035456	0.0323588	PPP1CB	5500
ENSG00000168398	104.744	-0.91822	0.315029	-2.91472	0.00356009	0.0324672	BDKRB2	624
ENSG00000130724	757.917	-0.41219	0.141441	-2.91423	0.00356573	0.0324709	CHMP2A	27243
ENSG00000171603	3222.87	-0.319943	0.109783	-2.91433	0.0035645	0.0324709	CLSTN1	22883
ENSG00000162512	712.959	0.422876	0.145158	2.91321	0.0035773	0.0325523	SDC3	9672
ENSG00000102898	2851.41	-0.369679	0.126995	-2.91098	0.00360292	0.0327615	NUTF2	10204
ENSG00000157107	601.606	0.468645	0.161094	2.90915	0.00362417	0.0329306	FCHO2	115548
ENSG00000081026	760.866	-0.417983	0.143733	-2.90804	0.00363699	0.0330229	MAGI3	260425
ENSG00000085721	2187.99	0.323971	0.111422	2.90762	0.00364193	0.0330436	RRN3	54700
ENSG00000136718	4100.09	-0.306262	0.105368	-2.90658	0.00365404	0.0331293	IMP4	92856
ENSG00000112679	649.836	0.444336	0.152953	2.90504	0.00367202	0.033268	DUSP22	56940
ENSG00000167670	1037.19	-0.405253	0.139513	-2.90478	0.00367514	0.0332719	CHAF1A	10036
ENSG00000085719	9750.91	0.318697	0.109778	2.9031	0.00369487	0.033374	CPNE3	8895
ENSG00000116791	1111.39	0.381797	0.1315	2.9034	0.00369137	0.033374	CRYZ	1429
ENSG00000140443	5418.35	-0.286326	0.0986343	-2.90291	0.00369717	0.033374	IGF1R	3480
ENSG00000181904	2173.74	0.355322	0.122385	2.90331	0.00369244	0.033374	C5orf24	134553
ENSG00000080608	1169.84	-0.366306	0.126199	-2.90261	0.00370062	0.0333809	PUM3	9933
ENSG00000107854	2954.79	0.340717	0.117412	2.90189	0.00370924	0.0334343	TNKS2	80351
ENSG00000086712	1599.34	-0.335975	0.115789	-2.90161	0.00371245	0.033439	TXLNG	55787
ENSG00000141934	667.351	0.424458	0.146319	2.90091	0.00372076	0.0334896	PLPP2	8612
ENSG00000174243	6164.84	-0.276185	0.0952167	-2.90059	0.0037246	0.0334999	DDX23	9416
ENSG00000152620	845.659	0.477353	0.164587	2.90031	0.00372791	0.0335053	NADK2	133686
ENSG00000111331	1060.33	-0.373839	0.128981	-2.8984	0.00375068	0.0336856	OAS3	4940
ENSG00000100393	2081.69	-0.344527	0.118891	-2.89785	0.00375734	0.033721	EP300	2033
ENSG00000133773	1288.33	-0.365793	0.126286	-2.89654	0.00377301	0.0338372	CCDC59	29080
ENSG00000159788	651.177	-0.427351	0.147581	-2.8957	0.00378309	0.033903	RGS12	6002
ENSG00000210196	47.9391	1.39194	0.48084	2.89481	0.00379384	0.0339748
ENSG00000107789	794.788	0.4059	0.140288	2.89333	0.00381181	0.0341112	MINPP1	9562
ENSG00000099860	701.471	-0.435683	0.150633	-2.89236	0.00382365	0.0341924	GADD45B	4616
ENSG00000151239	3969.28	0.362246	0.125284	2.89141	0.00383522	0.0342713	TWF1	5756
ENSG00000090924	722.2	-0.41739	0.144438	-2.88974	0.00385556	0.0344035	PLEKHG2	64857
ENSG00000116698	6042.02	-0.281456	0.0973966	-2.88979	0.003855	0.0344035	SMG7	9887
ENSG00000149196	997.073	0.390856	0.135297	2.88888	0.0038662	0.0344736	HIKESHI	51501
ENSG00000184635	372.55	-0.529203	0.183238	-2.88806	0.00387628	0.0345387	ZNF93	81931
ENSG00000110955	26746.6	0.260259	0.0901301	2.88759	0.00388209	0.0345492	ATP5B	506
ENSG00000115234	2220.97	0.313958	0.108738	2.88729	0.00388582	0.0345492	SNX17	9784
ENSG00000257270	115.536	-0.952396	0.329856	-2.88731	0.00388555	0.0345492
ENSG00000120889	1078.61	0.365904	0.126759	2.88662	0.00389402	0.0345974	TNFRSF10B	8795
ENSG00000127995	813.284	0.425347	0.14738	2.88606	0.00390095	0.0346342	CASD1	64921
ENSG00000141480	778.289	-0.41744	0.144656	-2.88573	0.00390502	0.0346455	ARRB2	409
ENSG00000112186	1989.59	-0.320468	0.111078	-2.88506	0.00391336	0.0346947	CAP2	10486
ENSG00000033867	870.362	0.41471	0.143907	2.88179	0.00395425	0.0349823	SLC4A7	9497
ENSG00000171204	1109.76	0.405598	0.140745	2.8818	0.00395416	0.0349823	TMEM126B	55863
ENSG00000175893	860.19	0.418585	0.14523	2.88223	0.00394876	0.0349823	ZDHHC21	340481
ENSG00000100532	338.574	0.564032	0.195741	2.88153	0.00395754	0.0349865	CGRRF1	10668
ENSG00000166575	609.542	0.472948	0.16419	2.88049	0.00397058	0.0350767	TMEM135	65084
ENSG00000171159	719.205	-0.541272	0.187936	-2.88009	0.00397563	0.0350964	C9orf16	79095
ENSG00000135525	1554.91	-0.34775	0.120772	-2.87938	0.00398452	0.0351499	MAP7	9053
ENSG00000211689	55.0297	-1.23315	0.428425	-2.87834	0.0039977	0.0352411	TARP	445347
ENSG00000106462	3110.87	-0.305253	0.106082	-2.87752	0.0040081	0.0353077	EZH2	2146
ENSG00000100568	2524.44	-0.306413	0.106511	-2.87682	0.00401703	0.0353612	VTI1B	10490
ENSG00000114942	6153.12	0.316918	0.110213	2.87552	0.00403361	0.0354626	EEF1B2	1933
ENSG00000123965	52.4598	1.34893	0.469116	2.87547	0.00403425	0.0354626
ENSG00000273018	61.3509	1.18282	0.411667	2.87325	0.00406274	0.0356877
ENSG00000106635	1822.61	-0.336607	0.117237	-2.87116	0.00408965	0.035883	BCL7B	9275
ENSG00000118246	1580.35	0.383204	0.133471	2.87108	0.00409075	0.035883	FASTKD2	22868
ENSG00000169750	600.966	-0.479076	0.16688	-2.87078	0.00409466	0.0358919	RAC3	5881
ENSG00000163535	1426.03	-0.380081	0.13247	-2.86919	0.00411519	0.0360464	SGO2	151246
ENSG00000170011	247.689	-0.623783	0.217512	-2.86782	0.00413317	0.0361783	MYRIP	25924
ENSG00000090372	2818.24	-0.331785	0.115728	-2.86694	0.00414463	0.0362531	STRN4	29888
ENSG00000226479	984.144	-0.376258	0.131258	-2.86656	0.0041496	0.036271	TMEM185B	79134
ENSG00000064195	277.853	-0.611686	0.213513	-2.86487	0.00417184	0.0364237	DLX3	1747
ENSG00000140284	909.232	0.398873	0.139233	2.86478	0.00417294	0.0364237	SLC27A2	11001
ENSG00000140006	574.727	0.498779	0.174214	2.86302	0.00419626	0.0365954	WDR89	112840
ENSG00000174233	2614.87	0.314766	0.109948	2.86285	0.00419851	0.0365954	ADCY6	112
ENSG00000179454	830.33	0.439439	0.153536	2.86213	0.00420804	0.0366527	KLHL28	54813
ENSG00000138160	3378.16	-0.319335	0.111606	-2.86127	0.00421952	0.0367151	KIF11	3832
ENSG00000188827	537.272	-0.50488	0.176461	-2.86115	0.00422111	0.0367151	SLX4	84464
ENSG00000119414	2372.38	0.319302	0.111643	2.86003	0.00423596	0.0368185	PPP6C	5537
ENSG00000127884	3790.03	0.290649	0.101653	2.85922	0.00424684	0.0368872	ECHS1	1892
ENSG00000119333	2792.14	-0.421013	0.147289	-2.85841	0.00425769	0.0369556	WDR34	89891
ENSG00000175390	2751.7	0.299483	0.104806	2.8575	0.00426997	0.0370363	EIF3F	8665
ENSG00000119231	2227.98	0.314544	0.110104	2.85679	0.00427948	0.0370928	SENP5	205564
ENSG00000095209	976.36	0.407474	0.142648	2.85649	0.00428348	0.0371016	TMEM38B	55151
ENSG00000183091	653.109	-0.424273	0.148553	-2.85603	0.00428971	0.0371296	NEB	4703
ENSG00000145555	622.216	-0.42926	0.150364	-2.85481	0.00430623	0.0372466	MYO10	4651
ENSG00000213347	503.378	-0.609113	0.213576	-2.85198	0.00434485	0.0375545	MXD3	83463
ENSG00000111843	2255.91	0.311057	0.109079	2.85167	0.00434898	0.037564	TMEM14C	51522
ENSG00000088305	1805.07	-0.326926	0.114691	-2.8505	0.00436504	0.0376096	DNMT3B	1789
ENSG00000088832	2215.9	0.32262	0.113184	2.8504	0.00436637	0.0376096	FKBP1A	2280
ENSG00000118816	6727.91	0.278452	0.0976696	2.85096	0.00435874	0.0376096	CCNI	10983
ENSG00000184428	1187.21	-0.368035	0.129102	-2.85074	0.00436176	0.0376096	TOP1MT	116447
ENSG00000132002	4266.01	-0.288413	0.101252	-2.84847	0.004393	0.0377865	DNAJB1	3337
ENSG00000186260	2749.53	-0.306709	0.107667	-2.84868	0.00439004	0.0377865	MKL2	57496
ENSG00000160633	2468.16	-0.361545	0.126939	-2.84818	0.00439703	0.037795	SAFB	6294
ENSG00000163754	1451.79	0.343531	0.120637	2.84765	0.00440436	0.0378318	GYG1	2992
ENSG00000134602	1780.65	0.325197	0.114222	2.84705	0.00441258	0.0378762	STK26	51765
ENSG00000115073	1261.87	0.351088	0.123382	2.84553	0.00443378	0.0380318	ACTR1B	10120
ENSG00000137807	3126.68	-0.29771	0.104692	-2.84367	0.00445975	0.0382031	KIF23	9493
ENSG00000139505	1664.79	0.364861	0.128312	2.84354	0.00446149	0.0382031	MTMR6	9107
ENSG00000160214	1457.37	-0.360253	0.126696	-2.84344	0.00446298	0.0382031	RRP1	8568
ENSG00000150753	10226.1	-0.260956	0.0918073	-2.84243	0.00447713	0.0382714	CCT5	22948
ENSG00000185924	1113.86	-0.421569	0.14831	-2.84249	0.00447621	0.0382714	RTN4RL1	146760
ENSG00000164039	155.268	0.767832	0.270195	2.84177	0.00448642	0.0383185	BDH2	56898
ENSG00000189057	1177.82	-0.36775	0.129416	-2.8416	0.00448881	0.0383185	FAM111B	374393
ENSG00000119685	1773.22	-0.320239	0.112713	-2.8412	0.00449446	0.0383403	TTLL5	23093
ENSG00000188176	196.391	-0.673282	0.237004	-2.84081	0.00449992	0.0383606	SMTNL2	342527
ENSG00000086589	2091.71	-0.319766	0.112573	-2.84051	0.00450412	0.03837	RBM22	55696
ENSG00000082438	545.985	-0.449435	0.158248	-2.84008	0.00451026	0.0383828	COBLL1	22837
ENSG00000117906	2565.6	0.393098	0.138416	2.83997	0.0045118	0.0383828	RCN2	5955
ENSG00000182459	177.777	0.70938	0.249885	2.83883	0.00452797	0.0384939	TEX19	400629
ENSG00000105793	1239.67	0.374664	0.132053	2.83723	0.00455073	0.038661	GTPBP10	85865
ENSG00000135776	436.148	0.481175	0.169649	2.8363	0.00456399	0.0387471	ABCB10	23456
ENSG00000198646	2267.23	-0.309123	0.109005	-2.83586	0.00457022	0.0387735	NCOA6	23054
ENSG00000049283	1285.35	-0.395129	0.139365	-2.83521	0.00457954	0.038826	EPN3	55040
ENSG00000113645	2311.85	-0.305241	0.107699	-2.8342	0.00459401	0.0389221	WWC1	23286
ENSG00000114395	172.643	0.718646	0.253643	2.8333	0.00460698	0.0389787	CYB561D2	11068
ENSG00000136854	539.733	-0.478265	0.168796	-2.83339	0.00460566	0.0389787	STXBP1	6812
ENSG00000144136	1985.74	0.32184	0.11361	2.83284	0.00461361	0.0389985	SLC20A1	6574
ENSG00000174839	785.346	0.430153	0.151856	2.83263	0.00461661	0.0389985	DENND6A	201627
ENSG00000213563	616.851	-0.617834	0.218124	-2.83249	0.00461874	0.0389985	C8orf82	414919
ENSG00000197785	736.342	-0.477842	0.168731	-2.83197	0.00462626	0.0390354	ATAD3A	55210
ENSG00000182700	243.422	0.652959	0.230593	2.83165	0.0046308	0.0390472	IGIP	492311
ENSG00000144711	1508.62	-0.384101	0.135657	-2.83141	0.00463428	0.03905	IQSEC1	9922
ENSG00000101166	5233.04	0.287052	0.10142	2.83031	0.00465023	0.0391579	PRELID3B	51012
ENSG00000156983	1452.29	-0.358912	0.126855	-2.82931	0.00466478	0.0392271	BRPF1	7862
ENSG00000177469	278.343	-0.587522	0.207647	-2.82943	0.00466313	0.0392271	CAVIN1	284119
ENSG00000137404	473.799	-0.478327	0.169198	-2.82703	0.00469819	0.0394813	NRM	11270
ENSG00000172500	1490.7	-0.342728	0.121297	-2.82552	0.00472038	0.0396409	FIBP	9158
ENSG00000093144	461.358	0.493294	0.174731	2.82317	0.00475519	0.0398263	ECHDC1	55862
ENSG00000138613	218.11	0.634323	0.224658	2.8235	0.00475021	0.0398263	APH1B	83464
ENSG00000170473	1116.8	-0.387989	0.137407	-2.82365	0.00474801	0.0398263	PYM1	84305
ENSG00000254858	899.825	-0.387687	0.137324	-2.82316	0.00475529	0.0398263	MPV17L2	84769
ENSG00000131508	2303.61	0.336467	0.119343	2.81934	0.00481232	0.0402768	UBE2D2	7322
ENSG00000127946	1569.35	-0.32773	0.116311	-2.81771	0.00483672	0.0404538	HIP1	3092
ENSG00000167900	2792.23	-0.351374	0.124748	-2.81666	0.00485255	0.0405588	TK1	7083
ENSG00000212769	179.604	0.6946	0.246641	2.81624	0.0048589	0.0405846
ENSG00000171206	870.164	-0.487096	0.173033	-2.81505	0.00487699	0.0407082	TRIM8	81603
ENSG00000106537	2625.17	0.324167	0.115209	2.81372	0.00489714	0.0408479	TSPAN13	27075
ENSG00000135148	1942.93	0.317774	0.112946	2.81352	0.0049003	0.0408479	TRAFD1	10906
ENSG00000141646	792.712	0.402471	0.143074	2.81303	0.00490769	0.0408821	SMAD4	4089
ENSG00000108578	1062.72	0.375783	0.133659	2.8115	0.00493105	0.0410491	BLMH	642
ENSG00000088766	556.714	0.437928	0.155852	2.8099	0.00495569	0.0411943	CRLS1	54675
ENSG00000132406	593.338	0.431859	0.153702	2.80972	0.00495845	0.0411943	TMEM128	85013
ENSG00000143952	923.066	0.407572	0.145057	2.80974	0.00495815	0.0411943	VPS54	51542
ENSG00000269983	66.0162	1.10715	0.39418	2.80875	0.00497347	0.0412914
ENSG00000198522	1181.26	0.382136	0.136085	2.80808	0.00498385	0.0413499	GPN1	11321
ENSG00000162368	2329.81	0.333652	0.118858	2.80714	0.00499828	0.041442	CMPK1	51727
ENSG00000063244	7250.76	-0.287073	0.102325	-2.8055	0.00502384	0.0416261	U2AF2	11338
ENSG00000198677	3395.85	0.299467	0.10676	2.80506	0.00503065	0.0416547	TTC37	9652
ENSG00000100814	798.52	0.414305	0.147743	2.80424	0.0050436	0.0417127	CCNB1IP1	57820
ENSG00000166971	503.273	0.45622	0.162692	2.80419	0.00504438	0.0417127	AKTIP	64400
ENSG00000123575	2487.07	0.316376	0.112876	2.80286	0.00506509	0.0418561	FAM199X	139231
ENSG00000088367	1265.81	-0.344534	0.122969	-2.80179	0.005082	0.0419679	EPB41L1	2036
ENSG00000116906	795.506	0.394847	0.140961	2.80111	0.00509271	0.0420284	GNPAT	8443
ENSG00000198160	621.528	0.454205	0.162196	2.80035	0.0051047	0.0420993	MIER1	57708
ENSG00000109956	50.7587	1.25466	0.448179	2.79946	0.00511884	0.0421655	B3GAT1	27087
ENSG00000139926	1095.04	0.358526	0.128072	2.79942	0.00511951	0.0421655	FRMD6	122786
ENSG00000087365	11140.5	-0.280455	0.100217	-2.79847	0.00513458	0.0422615	SF3B2	10992
ENSG00000082805	1748.38	-0.316256	0.113029	-2.798	0.00514206	0.0422923	ERC1	23085
ENSG00000167595	421.673	-0.518969	0.185492	-2.7978	0.00514513	0.0422923	PROSER3	148137
ENSG00000069345	2033.42	0.329926	0.117982	2.7964	0.00516752	0.0424482	DNAJA2	10294
ENSG00000127922	3033.1	0.371581	0.132899	2.79596	0.0051745	0.0424494	SEM1	7979
ENSG00000155393	664.895	0.436277	0.156033	2.79606	0.00517299	0.0424494	HEATR3	55027
ENSG00000159346	6712.54	-0.28606	0.102377	-2.79418	0.00520313	0.042656	ADIPOR1	51094
ENSG00000062822	1383.83	-0.458945	0.164293	-2.79346	0.00521472	0.0427228	POLD1	5424
ENSG00000258297	418.813	0.482466	0.172777	2.79242	0.00523159	0.0428327
ENSG00000133216	234.172	-0.641877	0.229884	-2.79218	0.00523542	0.0428358	EPHB2	2048
ENSG00000005007	3995.05	-0.319065	0.11429	-2.79173	0.00524275	0.0428676	UPF1	5976
ENSG00000173039	2001.38	-0.341628	0.122408	-2.7909	0.0052561	0.0429484	RELA	5970
ENSG00000139734	530.322	-0.454237	0.162786	-2.7904	0.00526428	0.042987	DIAPH3	81624
ENSG00000131779	1514.2	0.351836	0.126121	2.78967	0.00527621	0.043056	PEX11B	8799
ENSG00000177463	698.926	-0.413569	0.148261	-2.78946	0.00527967	0.043056	NR2C2	7182
ENSG00000013364	457.588	0.506109	0.181494	2.78857	0.00529408	0.0431452	MVP	9961
ENSG00000179588	203.613	-0.878429	0.315568	-2.78365	0.00537514	0.0437771	ZFPM1	161882
ENSG00000172009	1543.92	-0.397596	0.142962	-2.78114	0.00541685	0.0440878	THOP1	7064
ENSG00000078687	611.454	-0.45045	0.162131	-2.77832	0.00546411	0.0443369	TNRC6C	57690
ENSG00000102974	3747.72	-0.279008	0.100416	-2.77853	0.0054605	0.0443369	CTCF	10664
ENSG00000147526	2215.27	-0.307077	0.110529	-2.77825	0.00546531	0.0443369	TACC1	6867
ENSG00000149798	487.981	-0.479339	0.172527	-2.77834	0.00546369	0.0443369	CDC42EP2	10435
ENSG00000174738	1597.24	0.347594	0.125077	2.77904	0.00545191	0.0443369	NR1D2	9975
ENSG00000101412	1328.7	-0.351263	0.126448	-2.77792	0.00547089	0.0443531	E2F1	1869
ENSG00000187244	1010.3	-0.439896	0.158374	-2.77758	0.00547658	0.0443703	BCAM	4059
ENSG00000137692	780.554	0.409633	0.147514	2.77692	0.00548765	0.044431	DCUN1D5	84259
ENSG00000135269	910.383	0.371912	0.133973	2.77602	0.00550285	0.044525	TES	26136
ENSG00000089876	1347.66	0.355386	0.128033	2.77574	0.00550759	0.0445344	DHX32	55760
ENSG00000134152	408.386	0.569577	0.205339	2.77384	0.00553994	0.0447668	KATNBL1	79768
ENSG00000100614	3235.84	0.306664	0.110601	2.77271	0.00555911	0.0448437	PPM1A	5494
ENSG00000126822	1258.67	-0.346493	0.124978	-2.77243	0.00556391	0.0448437	PLEKHG3	26030
ENSG00000161016	33426	-0.284819	0.102727	-2.77258	0.00556131	0.0448437	RPL8	6132
ENSG00000197299	1317.9	-0.360122	0.129867	-2.77301	0.00555409	0.0448437	BLM	641
ENSG00000169246	233.939	-0.696892	0.251421	-2.77181	0.00557448	0.0448997	NPIPB3	23117
ENSG00000164898	66.5244	1.09455	0.394937	2.77144	0.00558081	0.0449216	FMC1	154791
ENSG00000148337	3934.44	-0.31917	0.115178	-2.77111	0.00558653	0.0449384	CIZ1	25792
ENSG00000105939	1836.23	-0.314544	0.113562	-2.76981	0.00560887	0.0450597	ZC3HAV1	56829
ENSG00000121716	448.937	0.46836	0.169091	2.76987	0.00560783	0.0450597	PILRB	29990
ENSG00000112029	666.222	-0.410128	0.148088	-2.76949	0.00561449	0.0450757	FBXO5	26271
ENSG00000106460	1043.58	0.402559	0.145415	2.76835	0.00563414	0.0452043	TMEM106B	54664
ENSG00000155957	453.321	0.577456	0.208638	2.76774	0.00564469	0.0452596	TMBIM4	51643
ENSG00000135535	4645.54	0.297382	0.107462	2.76733	0.00565179	0.0452873	CD164	8763
ENSG00000123064	2668.55	-0.372605	0.134668	-2.76685	0.00566015	0.045325	DDX54	79039
ENSG00000196981	433.541	0.487342	0.176174	2.76625	0.0056705	0.0453786	WDR5B	54554
ENSG00000104731	1814.84	-0.326663	0.118101	-2.76595	0.00567569	0.0453909	KLHDC4	54758
ENSG00000062725	14816.1	0.29907	0.108174	2.76471	0.00569732	0.045493	APPBP2	10513
ENSG00000143294	2724.73	-0.311569	0.112687	-2.7649	0.00569396	0.045493	PRCC	5546
ENSG00000177990	58.8421	-1.15641	0.418294	-2.76459	0.00569946	0.045493	DPY19L2	283417
ENSG00000188610	117.183	-0.822919	0.297772	-2.76359	0.00571697	0.0456035	FAM72B	653820
ENSG00000170100	627.518	-0.428991	0.155243	-2.76336	0.00572101	0.0456064	ZNF778	197320
ENSG00000142039	1152.21	-0.369892	0.133909	-2.76226	0.00574033	0.045731	CCDC97	90324
ENSG00000130856	433.387	-0.480589	0.174169	-2.75932	0.0057921	0.0461139	ZNF236	7776
ENSG00000187017	491.818	0.541735	0.196372	2.75872	0.00580282	0.0461696	ESPN	83715
ENSG00000130749	1518.69	-0.376775	0.136638	-2.75748	0.00582492	0.0463158	ZC3H4	23211
ENSG00000104611	325.704	-0.523692	0.189945	-2.75707	0.00583222	0.0463441	SH2D4A	63898
ENSG00000125970	3353.63	-0.357818	0.129822	-2.75621	0.00584753	0.046436	RALY	22913
ENSG00000107099	466.597	-0.463795	0.168299	-2.75577	0.00585533	0.0464683	DOCK8	81704
ENSG00000005194	1167.35	0.342141	0.124252	2.7536	0.00589431	0.046688	CIAPIN1	57019
ENSG00000103769	4510.59	0.296643	0.107727	2.75367	0.00589315	0.046688	RAB11A	8766
ENSG00000167671	1138.15	-0.379967	0.13797	-2.75398	0.00588761	0.046688	UBXN6	80700
ENSG00000003249	2226.4	-0.313293	0.113798	-2.75305	0.00590424	0.0467368	DBNDD1	79007
ENSG00000175221	652.386	-0.564154	0.20501	-2.75184	0.00592618	0.0468384	MED16	10025
ENSG00000176845	450.967	-0.663244	0.241029	-2.75172	0.00592839	0.0468384	METRNL	284207
ENSG00000186275	352.018	-0.525527	0.190971	-2.75187	0.00592565	0.0468384
ENSG00000152242	2408.29	0.311195	0.113106	2.75136	0.00593489	0.0468599	C18orf25	147339
ENSG00000105705	1039.55	-0.358621	0.130379	-2.7506	0.00594864	0.0469148	SUGP1	57794
ENSG00000182195	1276.96	-0.380383	0.138293	-2.75056	0.00594939	0.0469148	LDOC1	23641
ENSG00000125844	2940.34	-0.323582	0.117696	-2.74931	0.00597217	0.0470645	RRBP1	6238
ENSG00000197879	9097.92	-0.276779	0.100708	-2.74833	0.00598988	0.0471741	MYO1C	4641
ENSG00000101868	1513.59	-0.325421	0.118422	-2.74797	0.0059966	0.0471971	POLA1	5422
ENSG00000144290	123.087	-0.816412	0.297179	-2.74721	0.00601053	0.0472468	SLC4A10	57282
ENSG00000196781	1044.31	-0.433301	0.157723	-2.74723	0.00601006	0.0472468	TLE1	7088
ENSG00000005882	280.578	-0.57456	0.209198	-2.74649	0.00602367	0.0473154	PDK2	5164
ENSG00000116747	1584.98	0.367512	0.13383	2.74611	0.00603069	0.0473154	TROVE2	6738
ENSG00000169255	774.506	0.39695	0.144547	2.74617	0.00602956	0.0473154	B3GALNT1	8706
ENSG00000187634	768.101	-0.485585	0.176849	-2.74576	0.006037	0.047335	SAMD11	148398
ENSG00000080839	714.237	-0.40593	0.147979	-2.74316	0.00608504	0.0476731	RBL1	5933
ENSG00000111832	807.762	-0.382127	0.13932	-2.74281	0.00609165	0.0476731	RWDD1	51389
ENSG00000173457	1827.74	-0.359811	0.131177	-2.74294	0.00608922	0.0476731	PPP1R14B	26472
ENSG00000179387	1180.41	0.439113	0.160108	2.74259	0.00609558	0.0476738	ELMOD2	255520
ENSG00000141985	1374.38	-0.348433	0.127094	-2.74155	0.00611504	0.0477959	SH3GL1	6455
ENSG00000111799	70.9577	-1.05296	0.384169	-2.74089	0.00612732	0.0478617	COL12A1	1303
ENSG00000140632	2379.37	-0.302425	0.11037	-2.74011	0.00614191	0.0479455	GLYR1	84656
ENSG00000117632	4163.64	-0.301588	0.110094	-2.73937	0.00615567	0.0480228	STMN1	3925
ENSG00000166046	159.105	0.720435	0.263078	2.73848	0.00617236	0.0481227	TCP11L2	255394
ENSG00000197043	5545.79	-0.27498	0.100497	-2.73618	0.00621563	0.0484063	ANXA6	309
ENSG00000243156	861.598	-0.381509	0.139434	-2.73614	0.00621654	0.0484063	MICAL3	57553
ENSG00000148484	2042.83	-0.31358	0.114669	-2.73466	0.00624455	0.048594	RSU1	6251
ENSG00000128944	1383	-0.325232	0.119006	-2.73291	0.00627782	0.0488222	KNSTRN	90417
ENSG00000180178	334.573	0.528438	0.193396	2.73242	0.00628717	0.0488643	FAR2P1	440905
ENSG00000120008	2181.1	0.317406	0.116193	2.73171	0.0063006	0.0489381	WDR11	55717
ENSG00000060491	1161.42	-0.502676	0.184058	-2.73107	0.00631289	0.0489527	OGFR	11054
ENSG00000120253	991.749	0.369636	0.135345	2.73106	0.00631301	0.0489527	NUP43	348995
ENSG00000159593	1281.26	0.354245	0.129713	2.731	0.00631432	0.0489527	NAE1	8883
ENSG00000102931	401.301	0.484489	0.17755	2.72874	0.00635766	0.0492579	ARL2BP	23568
ENSG00000130396	3388.57	-0.29556	0.10837	-2.72733	0.00638501	0.0494175	AFDN	4301
ENSG00000225733	4943.12	0.267239	0.0979881	2.72726	0.00638622	0.0494175	FGD5-AS1	100505641
ENSG00000065911	3968.59	0.286277	0.105239	2.72025	0.00652319	0.0504277	MTHFD2	10797
ENSG00000105700	1291.08	-0.341556	0.125574	-2.71996	0.00652894	0.0504277	KXD1	79036
ENSG00000151327	1401.7	0.341241	0.125453	2.72007	0.00652679	0.0504277	FAM177A1	283635
ENSG00000136603	2126.11	0.332744	0.122353	2.71953	0.00653742	0.0504618	SKIL	6498
ENSG00000112062	2467.81	0.288018	0.105942	2.71864	0.00655504	0.0505663	MAPK14	1432
ENSG00000183495	2703.74	-0.353171	0.129938	-2.71798	0.00656809	0.0506355	EP400	57634
ENSG00000150756	342.004	0.517011	0.190252	2.7175	0.00657765	0.0506777	FAM173B	134145
ENSG00000172575	61.7035	-1.10925	0.408329	-2.71656	0.00659649	0.0507913	RASGRP1	10125
ENSG00000198125	545.964	0.436275	0.160624	2.71612	0.00660519	0.0508268	MB	4151
ENSG00000078237	670.297	0.402524	0.148224	2.71564	0.00661475	0.0508688	TIGAR	57103
ENSG00000166886	2146.38	-0.3321	0.122375	-2.71379	0.00665177	0.0511219	NAB2	4665
ENSG00000023228	4650.18	0.283616	0.10454	2.71299	0.00666789	0.051214	NDUFS1	4719
ENSG00000106290	2406.35	-0.305647	0.112788	-2.70992	0.0067299	0.0516583	TAF6	6878
ENSG00000125656	749.618	-0.517545	0.191007	-2.70955	0.00673738	0.0516838	CLPP	8192
ENSG00000166888	3797.47	0.276354	0.102046	2.70813	0.00676645	0.0518626	STAT6	6778
ENSG00000214300	295.56	-0.582969	0.215277	-2.708	0.00676905	0.0518626	SPDYE3	441272
ENSG00000163808	915.468	-0.371005	0.13702	-2.70767	0.0067757	0.0518815	KIF15	56992
ENSG00000036054	927.98	0.374858	0.138543	2.70572	0.00681558	0.0521042	TBC1D23	55773
ENSG00000162813	886.178	0.402056	0.148595	2.70571	0.00681582	0.0521042	BPNT1	10380
ENSG00000168256	1393.97	-0.331969	0.122695	-2.70564	0.00681737	0.0521042	NKIRAS2	28511
ENSG00000126215	1207.55	-0.356043	0.131634	-2.7048	0.0068346	0.0522037	XRCC3	7517
ENSG00000121211	374.514	-0.509158	0.188271	-2.7044	0.00684288	0.0522348	MND1	84057
ENSG00000160208	2622.95	-0.286247	0.105868	-2.70381	0.00685495	0.0522948	RRP1B	23076
ENSG00000121897	377.292	0.491519	0.181806	2.70353	0.00686066	0.0523062	LIAS	11019
ENSG00000102158	1680.83	0.316972	0.117253	2.70332	0.00686499	0.0523071	MAGT1	84061
ENSG00000170632	2211.83	0.315157	0.116605	2.70278	0.00687626	0.0523608	ARMC10	83787
ENSG00000010404	1113.62	0.353957	0.130998	2.702	0.00689232	0.0524345	IDS	3423
ENSG00000165516	1421.6	0.323306	0.119659	2.7019	0.00689438	0.0524345	KLHDC2	23588
ENSG00000137642	1588.13	0.336797	0.124713	2.70058	0.0069219	0.0525793	SORL1	6653
ENSG00000241472	249.624	-0.578935	0.214361	-2.70074	0.00691849	0.0525793	PTPRG-AS1	100506994
ENSG00000198961	3682.42	0.324813	0.120343	2.69907	0.00695328	0.0527854	PJA2	9867
ENSG00000142634	475.797	-0.47172	0.174814	-2.6984	0.00696727	0.0528593	EFHD2	79180
ENSG00000102174	88.6562	0.936467	0.347126	2.69777	0.00698057	0.0528955	PHEX	5251
ENSG00000122515	2717.61	-0.356048	0.131974	-2.69788	0.00697836	0.0528955	ZMIZ2	83637
ENSG00000132819	859.513	-0.481561	0.178668	-2.69529	0.00703283	0.053259	RBM38	55544
ENSG00000152078	215.104	0.635729	0.235912	2.69478	0.00704356	0.0533078	TMEM56	148534
ENSG00000125249	923.885	0.378909	0.140743	2.69222	0.0070979	0.0536862	RAP2A	5911
ENSG00000149929	623.73	-0.40786	0.151539	-2.69145	0.00711429	0.053712	HIRIP3	8479
ENSG00000158711	2276.56	0.315731	0.1173	2.69165	0.00710999	0.053712	ELK4	2005
ENSG00000175193	1146.92	0.343468	0.127604	2.69167	0.00710955	0.053712	PARL	55486
ENSG00000142002	1488.07	-0.341147	0.126795	-2.69054	0.00713365	0.0538255	DPP9	91039
ENSG00000109189	982.976	0.351302	0.130622	2.68946	0.00715688	0.0539351	USP46	64854
ENSG00000173402	7330.34	-0.259414	0.0964497	-2.68963	0.0071532	0.0539351	DAG1	1605
ENSG00000196696	349.813	0.509433	0.189444	2.6891	0.00716459	0.0539605	PDXDC2P-NPIPB14P	283970
ENSG00000064205	295.079	0.594071	0.221026	2.68779	0.00719271	0.0541394	WISP2	8839
ENSG00000154654	766.253	-0.381809	0.142164	-2.6857	0.00723774	0.0544333	NCAM2	4685
ENSG00000170412	406.158	0.471159	0.175441	2.68557	0.00724052	0.0544333	GPRC5C	55890
ENSG00000070831	4220.72	0.277514	0.103344	2.68534	0.00724559	0.0544384	CDC42	998
ENSG00000106348	3167.91	-0.304657	0.113475	-2.68479	0.00725755	0.0544953	IMPDH1	3614
ENSG00000101265	198.327	-0.664608	0.247928	-2.68065	0.00734789	0.0551402	RASSF2	9770
ENSG00000100425	1028.15	-0.367419	0.137096	-2.68002	0.00736187	0.0552118	BRD1	23774
ENSG00000065000	4291.77	-0.309296	0.115437	-2.67935	0.00737644	0.0552818	AP3D1	8943
ENSG00000115365	2320.04	0.344615	0.128636	2.67899	0.00738456	0.0552818	LANCL1	10314
ENSG00000116991	545.301	0.426106	0.159051	2.67904	0.00738329	0.0552818	SIPA1L2	57568
ENSG00000135540	332.884	-0.504642	0.188413	-2.67839	0.00739775	0.0553471	NHSL1	57224
ENSG00000099991	2665.63	-0.306553	0.11447	-2.67802	0.00740581	0.0553741	CABIN1	23523
ENSG00000181222	10782	-0.261054	0.0975445	-2.67626	0.00744492	0.055633
ENSG00000198755	7651.64	0.270851	0.101238	2.67539	0.00746421	0.0557436	RPL10A	4736
ENSG00000256870	182.964	-0.652176	0.243792	-2.67514	0.00746989	0.0557524	SLC5A8	160728
ENSG00000049089	180.704	-0.687388	0.257007	-2.67459	0.00748213	0.0558102	COL9A2	1298
ENSG00000160298	528.59	-0.477632	0.178621	-2.674	0.00749518	0.055874	C21orf58	54058
ENSG00000171236	611.687	-0.422303	0.157968	-2.67334	0.00751002	0.055951	LRG1	116844
ENSG00000158402	636.027	-0.42268	0.158171	-2.67229	0.00753349	0.0560661	CDC25C	995
ENSG00000174307	674.044	0.511587	0.191444	2.67225	0.0075345	0.0560661	PHLDA3	23612
ENSG00000115616	477.188	-0.460863	0.172502	-2.67164	0.00754818	0.0561342	SLC9A2	6549
ENSG00000272068	113.485	0.819631	0.306822	2.67136	0.00755453	0.0561478
ENSG00000005961	193.238	-0.636338	0.238283	-2.67052	0.00757348	0.0562288	ITGA2B	3674
ENSG00000049541	2015.54	-0.302814	0.113399	-2.67034	0.00757737	0.0562288	RFC2	5982
ENSG00000178409	390.982	-0.479083	0.179427	-2.67007	0.00758355	0.0562288	BEND3	57673
ENSG00000268885	85.0367	-1.06001	0.39697	-2.67025	0.00757947	0.0562288
ENSG00000185236	741.179	-0.461362	0.172834	-2.6694	0.00759874	0.0563078	RAB11B	9230
ENSG00000140367	759.061	0.38225	0.143217	2.66903	0.00760695	0.056335	UBE2Q2	92912
ENSG00000144747	1182.11	0.357268	0.133879	2.66859	0.00761711	0.0563454	TMF1	7110
ENSG00000226958	3895.56	-0.356016	0.133411	-2.66857	0.00761744	0.0563454
ENSG00000117036	1320.7	0.332361	0.124653	2.66628	0.0076695	0.0566967	ETV3	2117
ENSG00000124302	94.8999	-0.953446	0.357738	-2.66521	0.00769398	0.0568116	CHST8	64377
ENSG00000167685	942.31	-0.505818	0.189786	-2.6652	0.00769419	0.0568116	ZNF444	55311
ENSG00000170881	2794.88	0.333185	0.125039	2.66465	0.00770686	0.0568713	RNF139	11236
ENSG00000165684	872.408	-0.407833	0.153106	-2.66372	0.00772816	0.0569946	SNAPC4	6621
ENSG00000231925	3213.16	-0.290764	0.109173	-2.66334	0.00773691	0.0570253	TAPBP	6892
ENSG00000184436	572.192	-0.434109	0.163024	-2.66286	0.00774805	0.0570735	THAP7	80764
ENSG00000118640	2114.32	0.308677	0.115964	2.66183	0.0077717	0.0572138	VAMP8	8673
ENSG00000145246	346.528	0.495193	0.186058	2.6615	0.00777931	0.0572358	ATP10D	57205
ENSG00000124664	5125.03	-0.316685	0.119022	-2.66072	0.00779727	0.0573339	SPDEF	25803
ENSG00000129347	1219.88	-0.345727	0.129948	-2.6605	0.00780238	0.0573375	KRI1	65095
ENSG00000072134	927.01	-0.354523	0.133268	-2.66023	0.00780875	0.0573429	EPN2	22905
ENSG00000185275	472.945	-0.492952	0.185315	-2.66007	0.00781235	0.0573429
ENSG00000082512	555.98	0.477523	0.179655	2.65799	0.00786076	0.0576369	TRAF5	7188
ENSG00000124380	654.916	-0.391852	0.147433	-2.65783	0.00786448	0.0576369	SNRNP27	11017
ENSG00000139112	105.702	0.835723	0.314447	2.65775	0.00786634	0.0576369	GABARAPL1	23710
ENSG00000109107	395.929	-0.475392	0.17893	-2.65686	0.00788714	0.0577553	ALDOC	230
ENSG00000163874	471.838	-0.461995	0.17391	-2.65652	0.00789509	0.0577794	ZC3H12A	80149
ENSG00000204310	1044.83	-0.382575	0.144102	-2.65489	0.00793352	0.0580264	AGPAT1	10554
ENSG00000142168	3480.89	0.275867	0.103918	2.65467	0.00793859	0.0580293	SOD1	6647
ENSG00000105402	1634.38	-0.317487	0.119613	-2.65428	0.00794788	0.058063	NAPA	8775
ENSG00000143153	1569.17	0.311293	0.117309	2.65362	0.00796323	0.0580928	ATP1B1	481
ENSG00000178950	3343.82	-0.380677	0.143459	-2.65356	0.00796474	0.0580928	GAK	2580
ENSG00000197852	470.448	0.441734	0.166472	2.65351	0.00796599	0.0580928	FAM212B	55924
ENSG00000188917	1193.71	0.327795	0.123553	2.65307	0.00797627	0.0581336	TRMT2B	79979
ENSG00000073008	982.96	-0.349162	0.13163	-2.6526	0.00798737	0.0581803	PVR	5817
ENSG00000198625	1578.33	0.329399	0.124193	2.65232	0.00799404	0.0581947	MDM4	4194
ENSG00000269837	291.546	0.532927	0.200971	2.65176	0.00800731	0.0582572
ENSG00000129250	5746.57	-0.261064	0.0984588	-2.65151	0.00801338	0.0582672	KIF1C	10749
ENSG00000137460	435.783	-0.450098	0.169838	-2.65016	0.00804527	0.058426	FHDC1	85462
ENSG00000160223	1150.63	-0.346115	0.13061	-2.64999	0.00804934	0.058426	ICOSLG	23308
ENSG00000167637	166.281	0.668966	0.252417	2.65024	0.00804354	0.058426	ZNF283	284349
ENSG00000162819	937.212	0.404607	0.152754	2.64876	0.00807883	0.0586057	BROX	148362
ENSG00000204387	2924.46	0.284991	0.107652	2.64734	0.00811288	0.0588184	C6orf48	50854
ENSG00000177885	2692.17	-0.284344	0.107419	-2.64706	0.00811949	0.0588319	GRB2	2885
ENSG00000088833	1278.77	-0.337802	0.127649	-2.64634	0.00813684	0.0589233	NSFL1C	55968
ENSG00000105373	2656.44	-0.413766	0.156397	-2.64562	0.00815403	0.0590133	NOP53	29997
ENSG00000155660	8466.99	-0.246545	0.0932198	-2.64477	0.00817462	0.0591278	PDIA4	9601
ENSG00000108528	2147.49	-0.302988	0.114585	-2.64423	0.0081876	0.0591872	SLC25A11	8402
ENSG00000085274	829.025	0.380147	0.143781	2.64392	0.00819509	0.0592033	MYNN	55892
ENSG00000139718	1908.46	-0.348232	0.131725	-2.64362	0.00820243	0.0592033	SETD1B	23067
ENSG00000151498	695.292	0.385904	0.145979	2.64355	0.00820413	0.0592033	ACAD8	27034
ENSG00000151503	2589.21	-0.277194	0.104902	-2.64241	0.00823193	0.0593694	NCAPD3	23310
ENSG00000118496	378.672	0.481337	0.182187	2.642	0.00824185	0.0593719	FBXO30	84085
ENSG00000176853	5050.29	0.279465	0.105776	2.64205	0.00824071	0.0593719	FAM91A1	157769
ENSG00000165233	653.693	-0.423863	0.160483	-2.64116	0.00826217	0.0594838	CARD19	84270
ENSG00000131473	15000.4	-0.244666	0.0927029	-2.63925	0.00830909	0.0597869	ACLY	47
ENSG00000004478	12910.3	-0.24064	0.091186	-2.639	0.00831517	0.059796	FKBP4	2288
ENSG00000094804	1729.61	-0.316657	0.120004	-2.63872	0.00832197	0.0598103	CDC6	990
ENSG00000130723	10798.7	-0.262102	0.0993584	-2.63795	0.00834094	0.0599119	PRRC2B	84726
ENSG00000100105	2247.05	-0.291324	0.110458	-2.63743	0.00835374	0.059937	PATZ1	23598
ENSG00000227001	52.2861	-1.17357	0.444969	-2.63741	0.00835409	0.059937
ENSG00000113643	3895.14	0.295644	0.112147	2.63621	0.00838368	0.0600798	RARS	5917
ENSG00000177565	2014.34	0.324114	0.122947	2.63622	0.00838364	0.0600798	TBL1XR1	79718
ENSG00000156802	9334.43	-0.261537	0.0992564	-2.63496	0.00841469	0.0602672	ATAD2	29028
ENSG00000111859	237.852	0.572567	0.217314	2.63474	0.00842005	0.0602709	NEDD9	4739
ENSG00000182492	132.547	-0.771493	0.292891	-2.63406	0.0084371	0.0603581	BGN	633
ENSG00000144115	675.748	0.394424	0.149802	2.63297	0.00846424	0.0605121	THNSL2	55258
ENSG00000197728	1584.21	-0.347425	0.13196	-2.6328	0.00846838	0.0605121	RPS26	6231
ENSG00000125703	386.393	0.494369	0.187802	2.6324	0.00847845	0.0605492	ATG4C	84938
ENSG00000226752	806.944	0.391924	0.148898	2.63217	0.00848415	0.0605551	CUTALP	253039
ENSG00000109099	78.4823	-0.94267	0.358165	-2.63194	0.00848988	0.0605611	PMP22	5376
ENSG00000174827	58.3475	-1.09453	0.416026	-2.63092	0.00851545	0.0607086	PDZK1	5174
ENSG00000049167	424.66	0.492084	0.187086	2.63025	0.00853216	0.0607637	ERCC8	1161
ENSG00000122359	2120.82	-0.300364	0.114197	-2.63022	0.00853296	0.0607637	ANXA11	311
ENSG00000161999	524.62	-0.529986	0.201579	-2.62918	0.00855916	0.0609153	JMJD8	339123
ENSG00000121542	340.187	0.534474	0.203304	2.62894	0.00856523	0.0609236	SEC22A	26984
ENSG00000135452	738.195	0.433122	0.16477	2.62865	0.00857249	0.0609403	TSPAN31	6302
ENSG00000198133	1145.07	0.333831	0.127029	2.628	0.00858888	0.0610219	TMEM229B	161145
ENSG00000163728	1012.7	0.396761	0.151023	2.62716	0.00861018	0.0611382	TTC14	151613
ENSG00000167797	1066	-0.417674	0.159014	-2.62665	0.00862303	0.0611944	CDK2AP2	10263
ENSG00000174231	19170.2	-0.248874	0.0947634	-2.62626	0.00863282	0.0612289	PRPF8	10594
ENSG00000100207	1978.68	-0.289814	0.11039	-2.62538	0.00865532	0.0613534	TCF20	6942
ENSG00000134086	2501.42	0.281146	0.107099	2.6251	0.00866242	0.0613687	VHL	7428
ENSG00000120992	1980.84	0.339283	0.129278	2.62445	0.00867882	0.0614148	LYPLA1	10434
ENSG00000148303	24279.9	0.241256	0.0919239	2.62452	0.0086771	0.0614148	RPL7A	6130
ENSG00000108465	2335.29	0.281913	0.107432	2.62411	0.00868753	0.0614414	CDK5RAP3	80279
ENSG00000164403	137.712	-0.748172	0.285136	-2.62391	0.0086927	0.061443	SHROOM1	134549
ENSG00000100519	2876.22	0.323134	0.123199	2.62286	0.0087194	0.0615265	PSMC6	5706
ENSG00000103423	2972.23	-0.297459	0.113401	-2.62307	0.00871419	0.0615265	DNAJA3	9093
ENSG00000123143	3013.94	-0.29478	0.112382	-2.62303	0.00871519	0.0615265	PKN1	5585
ENSG00000177879	1357.02	0.324624	0.123778	2.62264	0.00872516	0.0615322	AP3S1	1176
ENSG00000185658	4643.12	0.302116	0.115217	2.62214	0.0087379	0.0615871	BRWD1	54014
ENSG00000182054	6452.83	-0.269172	0.102686	-2.62132	0.00875901	0.0617008	IDH2	3418
ENSG00000118655	3536.59	-0.270706	0.103311	-2.62031	0.00878506	0.0618492	DCLRE1B	64858
ENSG00000154889	552.24	0.410521	0.156729	2.61931	0.00881089	0.0619959	MPPE1	65258
ENSG00000092140	1693.57	0.335676	0.128233	2.61771	0.00885229	0.0621483	G2E3	55632
ENSG00000102890	1225.06	0.344864	0.131718	2.6182	0.00883942	0.0621483	ELMO3	79767
ENSG00000104472	1193.91	-0.328167	0.125365	-2.6177	0.00885258	0.0621483	CHRAC1	54108
ENSG00000130584	247.331	-0.578931	0.22114	-2.61794	0.0088462	0.0621483	ZBTB46	140685
ENSG00000130734	735.073	-0.425944	0.162741	-2.61731	0.00886253	0.062183	ATG4D	84971
ENSG00000117411	1129.27	-0.34203	0.130766	-2.61558	0.00890757	0.0624088	B4GALT2	8704
ENSG00000126243	311.869	-0.623681	0.238433	-2.61575	0.00890321	0.0624088	LRFN3	79414
ENSG00000166716	2474.77	-0.2875	0.109922	-2.6155	0.0089098	0.0624088	ZNF592	9640
ENSG00000100219	17120.4	-0.239982	0.0917859	-2.61458	0.00893369	0.0625409	XBP1	7494
ENSG00000179820	481.864	-0.439163	0.168098	-2.61254	0.00898734	0.062881	MYADM	91663
ENSG00000179403	482.205	-0.527196	0.201848	-2.61184	0.00900556	0.0629729	VWA1	64856
ENSG00000042062	53.0328	1.13237	0.433682	2.61106	0.00902633	0.0630472	RIPOR3	140876
ENSG00000121089	70.366	1.01426	0.388422	2.61122	0.00902189	0.0630472
ENSG00000237515	266.925	-0.563725	0.216044	-2.60931	0.00907254	0.0633343	SHISA9	729993
ENSG00000109917	1610.67	-0.299479	0.114797	-2.60878	0.00908658	0.0633966	ZPR1	8882
ENSG00000107951	713.229	0.379975	0.145703	2.60788	0.00911055	0.063503	MTPAP	55149
ENSG00000162894	145.515	-0.71837	0.275467	-2.60782	0.00911206	0.063503	FCMR	9214
ENSG00000138399	1119.14	0.333773	0.128002	2.60756	0.00911901	0.0635158	FASTKD1	79675
ENSG00000156973	505.687	-0.420162	0.161207	-2.60634	0.00915147	0.0637061	PDE6D	5147
ENSG00000205302	2706.54	0.287654	0.110402	2.60551	0.00917372	0.0638253	SNX2	6643
ENSG00000161921	424.403	-0.455097	0.174737	-2.60447	0.00920177	0.0639487	CXCL16	58191
ENSG00000173209	1248.98	0.317387	0.121859	2.60455	0.00919939	0.0639487	AHSA2	130872
ENSG00000197050	329.033	0.564515	0.216848	2.60328	0.00923364	0.0641343	ZNF420	147923
ENSG00000167216	317.268	-0.504122	0.19375	-2.60192	0.00927039	0.0643535	KATNAL2	83473
ENSG00000204516	170.386	-0.661535	0.254274	-2.60166	0.00927734	0.0643658	MICB	4277
ENSG00000160094	340.27	-0.522329	0.200842	-2.60069	0.00930366	0.0645123	ZNF362	149076
ENSG00000167904	433.846	0.461323	0.177409	2.60034	0.00931326	0.0645204	TMEM68	137695
ENSG00000177602	482.311	-0.427608	0.164448	-2.60026	0.00931522	0.0645204	HASPIN	83903
ENSG00000081177	1758.78	0.29892	0.114973	2.59992	0.00932461	0.0645494	EXD2	55218
ENSG00000265681	269.353	0.576413	0.221737	2.59954	0.00933497	0.0645851	RPL17	6139
ENSG00000143476	911.337	-0.348147	0.133959	-2.5989	0.00935229	0.0646689	DTL	51514
ENSG00000108639	5214.28	-0.275314	0.105974	-2.59793	0.00937865	0.064815	SYNGR2	9144
ENSG00000141994	418.649	-0.578727	0.222911	-2.59622	0.00942554	0.0650741	DUS3L	56931
ENSG00000179091	4620.44	-0.287844	0.11088	-2.59599	0.00943187	0.0650741	CYC1	1537
ENSG00000197429	342.607	0.511438	0.197001	2.59612	0.00942825	0.0650741	IPP	3652
ENSG00000088726	61.4337	1.14588	0.44149	2.59549	0.00944571	0.0651334	TMEM40	55287
ENSG00000165669	836.613	0.418651	0.161313	2.59527	0.00945173	0.0651387	FAM204A	63877
ENSG00000091947	800.248	0.360824	0.139098	2.59402	0.00948596	0.0653021	TMEM101	84336
ENSG00000167920	131.303	0.742596	0.286267	2.59407	0.00948478	0.0653021	TMEM99	147184
ENSG00000225031	97.2116	0.901792	0.347846	2.59251	0.00952793	0.0655547
ENSG00000087008	700.795	0.378383	0.146032	2.5911	0.00956695	0.0657503	ACOX3	8310
ENSG00000204060	72.4144	-1.03167	0.398146	-2.59118	0.00956467	0.0657503
ENSG00000156860	2966.07	-0.302035	0.116623	-2.58984	0.009602	0.0659182	FBRS	64319
ENSG00000176410	294.931	-0.598904	0.231235	-2.59002	0.0095969	0.0659182	DNAJC30	84277
ENSG00000182199	3634.52	-0.26166	0.101072	-2.58883	0.00963021	0.0660752	SHMT2	6472
ENSG00000146223	7594.32	0.257525	0.0995036	2.5881	0.00965064	0.0661788	RPL7L1	285855
ENSG00000085999	676.313	-0.379778	0.146766	-2.58764	0.00966367	0.0662316	RAD54L	8438
ENSG00000157557	616.505	-0.396246	0.153142	-2.58745	0.00966901	0.0662316	ETS2	2114
ENSG00000125991	4568.81	0.263381	0.101804	2.58713	0.00967779	0.0662552	ERGIC3	51614
ENSG00000142937	10491.3	0.261083	0.100931	2.58674	0.00968884	0.0662943	RPS8	6202
ENSG00000151414	1759.94	0.398932	0.154265	2.58602	0.00970907	0.0663596	NEK7	140609
ENSG00000168002	2088.25	0.293495	0.113487	2.58616	0.00970515	0.0663596	POLR2G	5436
ENSG00000126602	2890.53	-0.298225	0.115348	-2.58544	0.00972561	0.066363	TRAP1	10131
ENSG00000145736	148.888	0.708475	0.274004	2.58564	0.0097199	0.066363	GTF2H2	2966
ENSG00000146950	230.596	-0.575312	0.222515	-2.58549	0.00972397	0.066363	SHROOM2	357
ENSG00000213625	1001.12	0.362506	0.140252	2.58468	0.00974705	0.0664727	LEPROT	54741
ENSG00000198496	119.74	0.762638	0.295112	2.58423	0.0097597	0.0665225	NBR2	10230
ENSG00000183723	3632.35	0.271531	0.1051	2.58356	0.00977875	0.0666157	CMTM4	146223
ENSG00000196562	11654	-0.260102	0.100691	-2.58316	0.00979002	0.0666559	SULF2	55959
ENSG00000205250	2254.05	-0.316012	0.122345	-2.58296	0.00979556	0.0666571	E2F4	1874
ENSG00000187624	64.0944	-1.03494	0.401141	-2.57998	0.00988052	0.0671983	C17orf97	400566
ENSG00000066044	2526.16	-0.27629	0.107126	-2.57912	0.00990534	0.0673302	ELAVL1	1994
ENSG00000204842	983.596	-0.357292	0.138553	-2.57873	0.00991633	0.0673681	ATXN2	6311
ENSG00000085365	3476.26	0.364791	0.141479	2.5784	0.00992593	0.0673964	SCAMP1	9522
ENSG00000079313	609.141	-0.528965	0.205181	-2.57804	0.00993634	0.0674302	REXO1	57455
ENSG00000165476	1682.61	0.315876	0.122557	2.57738	0.00995523	0.0675215	REEP3	221035
ENSG00000090975	298.114	-0.554506	0.215213	-2.57655	0.00997924	0.0676474	PITPNM2	57605
ENSG00000142186	2835.79	-0.298326	0.115851	-2.57508	0.0100217	0.0678983	SCYL1	57410
ENSG00000197063	871.656	0.353299	0.137252	2.5741	0.0100502	0.0680543	MAFG	4097
ENSG00000157045	799.251	-0.37465	0.145567	-2.57372	0.0100611	0.0680906	NTAN1	123803
ENSG00000173065	695.575	-0.381765	0.148386	-2.57277	0.0100887	0.0682402	FAM222B	55731
ENSG00000198546	490.929	-0.429835	0.167145	-2.57163	0.010122	0.0684282	ZNF511	118472
ENSG00000126705	396.764	-0.562615	0.218832	-2.57099	0.0101408	0.0684963	AHDC1	27245
ENSG00000155099	136.682	0.722921	0.281235	2.57052	0.0101546	0.0684963	PIP4P2	55529
ENSG00000155858	681.504	0.397774	0.154755	2.57035	0.0101597	0.0684963	LSM11	134353
ENSG00000185049	1038.99	-0.42553	0.165553	-2.57036	0.0101593	0.0684963	NELFA	7469
ENSG00000257218	1354.47	-0.31078	0.120884	-2.57089	0.0101437	0.0684963	GATC	283459
ENSG00000063322	1584.22	-0.31372	0.122118	-2.569	0.0101992	0.0685841	MED29	55588
ENSG00000124562	3539.93	-0.268374	0.104468	-2.56896	0.0102003	0.0685841	SNRPC	6631
ENSG00000130559	2210.71	-0.289944	0.112848	-2.56933	0.0101895	0.0685841	CAMSAP1	157922
ENSG00000135486	14647.7	0.247168	0.0961896	2.56959	0.0101818	0.0685841	HNRNPA1	3178
ENSG00000203879	2902.36	-0.280243	0.109084	-2.56905	0.0101978	0.0685841	GDI1	2664
ENSG00000165512	358.738	0.545159	0.212248	2.5685	0.010214	0.0686391	ZNF22	7570
ENSG00000181704	1136.65	0.34402	0.133965	2.56798	0.0102294	0.068705	YIPF6	286451
ENSG00000121653	219.741	-0.592794	0.230872	-2.56763	0.0102395	0.0687359	MAPK8IP1	9479
ENSG00000152767	789.683	-0.355622	0.138577	-2.56624	0.0102809	0.0689764	FARP1	10160
ENSG00000169519	492.039	0.480129	0.187194	2.56487	0.0103214	0.0691732	METTL15	196074
ENSG00000179134	2810.6	-0.301908	0.117707	-2.56491	0.0103204	0.0691732	SAMD4B	55095
ENSG00000189223	877.395	0.347208	0.135473	2.56292	0.0103796	0.0695258	PAX8-AS1	654433
ENSG00000051825	1497.7	-0.324138	0.126503	-2.56229	0.0103985	0.0696149	MPHOSPH9	10198
ENSG00000131778	2675.78	0.291301	0.113718	2.56162	0.0104186	0.069712	CHD1L	9557
ENSG00000055211	536.369	0.407649	0.15918	2.56093	0.0104392	0.0697368	GINM1	116254
ENSG00000139291	994.946	0.353856	0.138161	2.56119	0.0104316	0.0697368	TMEM19	55266
ENSG00000174953	2576.48	0.330681	0.129118	2.56108	0.0104347	0.0697368	DHX36	170506
ENSG00000185716	481.142	0.472043	0.184357	2.56048	0.0104528	0.0697903	C16orf52	730094
ENSG00000167106	1663.29	-0.32988	0.128868	-2.55982	0.0104726	0.0698849	FAM102A	399665
ENSG00000105722	1629.81	-0.381714	0.149144	-2.55937	0.0104862	0.0699381	ERF	2077
ENSG00000115109	2856.35	0.297771	0.116355	2.55915	0.0104928	0.0699444	EPB41L5	57669
ENSG00000196576	5007.48	-0.325194	0.127097	-2.55864	0.0105083	0.0700104	PLXNB2	23654
ENSG00000156531	1910.87	0.329289	0.128717	2.55824	0.0105204	0.0700529	PHF6	84295
ENSG00000005884	1351.27	-0.337165	0.131842	-2.55733	0.0105478	0.0701981	ITGA3	3675
ENSG00000198576	70.2397	-1.17224	0.458498	-2.55669	0.0105673	0.0702898	ARC	23237
ENSG00000183734	131.373	-0.788008	0.308326	-2.55576	0.0105955	0.0704402	ASCL2	430
ENSG00000183111	167.837	0.681216	0.266591	2.55528	0.0106102	0.0705	ARHGEF37	389337
ENSG00000141428	386.379	-0.490485	0.19199	-2.55474	0.0106268	0.0705721	C18orf21	83608
ENSG00000104976	378.226	-0.494091	0.193436	-2.55429	0.0106406	0.0706262	SNAPC2	6618
ENSG00000132361	6726.23	-0.325662	0.127517	-2.55387	0.0106533	0.0706729	CLUH	23277
ENSG00000153904	653.264	-0.377098	0.147736	-2.55251	0.0106951	0.070912	DDAH1	23576
ENSG00000127720	186.067	0.623321	0.244249	2.55199	0.0107109	0.0709689	METTL25	84190
ENSG00000186130	800.315	0.394008	0.154401	2.55186	0.0107151	0.0709689	ZBTB6	10773
ENSG00000206560	2303.26	0.284874	0.111642	2.55166	0.0107211	0.070971	ANKRD28	23243
ENSG00000135677	5279.81	0.250911	0.0983718	2.55064	0.0107526	0.0711417	GNS	2799
ENSG00000106153	2546.96	0.348239	0.136583	2.54966	0.0107829	0.0713041	CHCHD2	51142
ENSG00000105738	1083.15	-0.387129	0.151911	-2.54839	0.0108222	0.0714497	SIPA1L3	23094
ENSG00000131495	566.731	0.450154	0.176639	2.54844	0.0108205	0.0714497	NDUFA2	4695
ENSG00000164209	1871.67	0.310861	0.121983	2.54839	0.010822	0.0714497	SLC25A46	91137
ENSG00000196550	121.127	-0.783683	0.307566	-2.54802	0.0108337	0.0714876	FAM72C	554282
ENSG00000124496	1472.87	-0.302291	0.118692	-2.54684	0.0108702	0.0716901	TRERF1	55809
ENSG00000197321	1161.62	-0.322301	0.126563	-2.54657	0.0108786	0.0717077	SVIL	6840
ENSG00000126767	823.061	-0.36567	0.143611	-2.54625	0.0108886	0.0717355	ELK1	2002
ENSG00000113360	2523.22	-0.281174	0.110494	-2.5447	0.0109373	0.0719416	DROSHA	29102
ENSG00000122779	2018.42	-0.288552	0.113379	-2.54503	0.0109269	0.0719416	TRIM24	8805
ENSG00000176018	1252.74	0.345086	0.135607	2.54475	0.0109356	0.0719416	LYSMD3	116068
ENSG00000171824	1991.92	-0.288398	0.113375	-2.54375	0.0109669	0.0720981	EXOSC10	5394
ENSG00000179348	146.93	-0.698312	0.274584	-2.54316	0.0109853	0.0721811	GATA2	2624
ENSG00000140022	91.3464	-0.850119	0.334457	-2.54179	0.0110286	0.0724012	STON2	85439
ENSG00000253626	252.421	0.675343	0.265702	2.54173	0.0110305	0.0724012	EIF5AL1	143244
ENSG00000164144	1386.82	0.332671	0.130906	2.5413	0.011044	0.0724512	ARFIP1	27236
ENSG00000108561	4578.57	-0.252816	0.0995419	-2.5398	0.0110917	0.0727257	C1QBP	708
ENSG00000129993	1412.11	-0.854554	0.33654	-2.53923	0.0111096	0.0727403	CBFA2T3	863
ENSG00000145495	5657.31	0.257529	0.10142	2.53924	0.0111095	0.0727403	MARCH6	10299
ENSG00000168300	428.306	0.457271	0.180086	2.53917	0.0111115	0.0727403	PCMTD1	115294
ENSG00000157933	1183.12	-0.452272	0.178166	-2.53849	0.0111332	0.0728443	SKI	6497
ENSG00000169612	516.554	0.468363	0.184527	2.53818	0.0111431	0.0728702	FAM103A1	83640
ENSG00000120265	2332.51	0.28054	0.110583	2.53691	0.0111836	0.073097	PCMT1	5110
ENSG00000112237	1280.31	0.35743	0.140943	2.53598	0.0112132	0.0731985	CCNC	892
ENSG00000113742	455.045	0.45092	0.177817	2.53587	0.0112168	0.0731985	CPEB4	80315
ENSG00000128283	493.114	-0.467979	0.184531	-2.53604	0.0112113	0.0731985	CDC42EP1	11135
ENSG00000131591	416.919	-0.522868	0.206345	-2.53395	0.0112786	0.0735626	C1orf159	54991
ENSG00000103051	2562.97	0.27371	0.108087	2.5323	0.0113316	0.0738001	COG4	25839
ENSG00000124198	2869.38	0.275739	0.10889	2.53227	0.0113328	0.0738001	ARFGEF2	10564
ENSG00000178338	543.988	-0.40088	0.15829	-2.53258	0.0113228	0.0738001	ZNF354B	117608
ENSG00000174669	1838.83	-0.34634	0.136809	-2.53155	0.0113558	0.0739111	SLC29A2	3177
ENSG00000177614	139.018	-0.711417	0.281066	-2.53114	0.0113693	0.07396	PGBD5	79605
ENSG00000260822	483.917	0.41705	0.164796	2.53071	0.0113834	0.0740127
ENSG00000129484	729.442	-0.371917	0.147022	-2.52966	0.0114173	0.0741948	PARP2	10038
ENSG00000167862	839.889	-0.354971	0.140374	-2.52875	0.0114469	0.0743479	MRPL58	3396
ENSG00000055070	3693.21	-0.254245	0.100587	-2.52762	0.011484	0.0743862	SZRD1	26099
ENSG00000099337	957.907	-0.352598	0.139494	-2.52769	0.0114816	0.0743862	KCNK6	9424
ENSG00000116918	742.782	0.377762	0.149461	2.52749	0.0114881	0.0743862	TSNAX	7257
ENSG00000143162	1578.63	0.295485	0.116909	2.52747	0.0114887	0.0743862	CREG1	8804
ENSG00000175727	1869.77	-0.293926	0.116288	-2.52758	0.0114852	0.0743862	MLXIP	22877
ENSG00000248175	84.7321	0.879738	0.348023	2.52782	0.0114775	0.0743862
ENSG00000119787	1919.56	0.298905	0.118286	2.52697	0.0115051	0.0744211	ATL2	64225
ENSG00000166847	4570.69	0.250415	0.0990982	2.52694	0.0115061	0.0744211	DCTN5	84516
ENSG00000083457	507.687	0.412684	0.163364	2.52616	0.0115317	0.0744704	ITGAE	3682
ENSG00000100023	2386.37	-0.309571	0.122533	-2.52643	0.0115228	0.0744704	PPIL2	23759
ENSG00000132017	839.024	-0.403163	0.159595	-2.52616	0.0115316	0.0744704	DCAF15	90379
ENSG00000092470	570.383	-0.40806	0.161548	-2.52593	0.0115394	0.0744807	WDR76	79968
ENSG00000128487	1257.3	-0.3165	0.125324	-2.52545	0.0115551	0.0745434	SPECC1	92521
ENSG00000165689	1773.72	-0.307349	0.121807	-2.52325	0.0116275	0.0749719	SDCCAG3	10807
ENSG00000105325	1259.87	-0.365777	0.145009	-2.52245	0.0116542	0.0751049	FZR1	51343
ENSG00000103202	1442.1	-0.317943	0.126061	-2.52214	0.0116643	0.0751311	NME4	4833
ENSG00000178252	5911.8	0.243447	0.0965453	2.52158	0.0116829	0.0752116	WDR6	11180
ENSG00000007968	539.78	-0.406386	0.161219	-2.52071	0.011712	0.0752817	E2F2	1870
ENSG00000105393	446.694	0.428385	0.16994	2.52081	0.0117086	0.0752817	BABAM1	29086
ENSG00000163486	2405.4	-0.268578	0.106534	-2.52106	0.0117002	0.0752817
ENSG00000072518	2235.73	-0.281691	0.111783	-2.51998	0.0117363	0.075298	MARK2	2011
ENSG00000145217	312.262	-0.566997	0.225006	-2.51992	0.0117383	0.075298	SLC26A1	10861
ENSG00000183856	1380.63	-0.312222	0.123903	-2.5199	0.0117388	0.075298	IQGAP3	128239
ENSG00000243742	168.339	-0.772327	0.306461	-2.52015	0.0117305	0.075298	RPLP0P2	113157
ENSG00000130313	653.928	-0.477075	0.189355	-2.51948	0.0117529	0.0753498	PGLS	25796
ENSG00000136883	213.741	-0.592331	0.235161	-2.51883	0.0117744	0.0754486	KIF12	113220
ENSG00000124222	3068	0.261425	0.103803	2.51847	0.0117864	0.0754867	STX16	8675
ENSG00000167880	1558.46	-0.391883	0.155769	-2.51579	0.0118765	0.0760243	EVPL	2125
ENSG00000069849	1463.39	0.3689	0.146702	2.51462	0.0119161	0.0761597	ATP1B3	483
ENSG00000103111	2221.39	-0.27651	0.109948	-2.5149	0.0119065	0.0761597	MON1B	22879
ENSG00000155640	345.769	-0.472026	0.18771	-2.51465	0.0119149	0.0761597
ENSG00000104889	3698.26	-0.284067	0.112979	-2.51433	0.0119258	0.0761825	RNASEH2A	10535
ENSG00000156931	1342.28	0.30943	0.123126	2.51311	0.0119672	0.0764079	VPS8	23355
ENSG00000153140	699.999	0.415253	0.165249	2.51289	0.0119747	0.0764165	CETN3	1070
ENSG00000067057	3541.05	-0.26466	0.10533	-2.51268	0.0119819	0.0764234	PFKP	5214
ENSG00000174705	657.273	-0.372281	0.14819	-2.51218	0.0119987	0.0764911	SH3PXD2B	285590
ENSG00000121680	498.157	0.42491	0.16916	2.51188	0.012009	0.076517	PEX16	9409
ENSG00000162105	782.307	-0.36136	0.143872	-2.51167	0.012016	0.0765225	SHANK2	22941
ENSG00000034677	980.37	0.357764	0.14248	2.51098	0.0120397	0.0766341	RNF19A	25897
ENSG00000168758	10313.9	-0.245061	0.097637	-2.50992	0.0120759	0.0768254	SEMA4C	54910
ENSG00000117362	8797.61	0.256556	0.102225	2.50971	0.012083	0.0768308	APH1A	51107
ENSG00000128000	286.124	0.507718	0.202327	2.50939	0.012094	0.0768418	ZNF780B	163131
ENSG00000138587	237.652	-0.552756	0.220283	-2.5093	0.0120971	0.0768418	MNS1	55329
ENSG00000077809	8327.42	0.233813	0.0932398	2.50765	0.0121538	0.0770444
ENSG00000085063	1284.63	0.325784	0.129897	2.50802	0.0121408	0.0770444	CD59	966
ENSG00000166441	7421.27	0.259267	0.103386	2.50776	0.01215	0.0770444	RPL27A	6157
ENSG00000167258	2753.57	-0.267642	0.106726	-2.50775	0.0121504	0.0770444	CDK12	51755
ENSG00000130707	8193.31	-0.266197	0.106171	-2.50726	0.0121671	0.0770706	ASS1	445
ENSG00000163527	6258.98	0.276991	0.11048	2.50717	0.0121703	0.0770706	STT3B	201595
ENSG00000132274	143.996	-0.713617	0.284882	-2.50496	0.0122467	0.0775144	TRIM22	10346
ENSG00000124226	2787.6	0.26203	0.10462	2.50459	0.0122593	0.0775151	RNF114	55905
ENSG00000185787	8659.86	0.275153	0.109853	2.50473	0.0122545	0.0775151	MORF4L1	10933
ENSG00000107404	1237.38	-0.43873	0.1752	-2.50417	0.0122739	0.0775486	DVL1	1855
ENSG00000164040	1134.42	0.315844	0.126132	2.50408	0.0122771	0.0775486	PGRMC2	10424
ENSG00000139146	1801.38	0.299507	0.119638	2.50345	0.0122991	0.0776479	SINHCAF	58516
ENSG00000171109	1926.24	0.305975	0.122261	2.50264	0.0123272	0.0777858	MFN1	55669
ENSG00000021574	953.405	0.344931	0.137859	2.50206	0.0123473	0.0778579	SPAST	6683
ENSG00000143217	641.001	0.375102	0.149924	2.50195	0.0123511	0.0778579	NECTIN4	81607
ENSG00000101266	3160.48	-0.258338	0.10328	-2.50133	0.0123726	0.0779539	CSNK2A1	1457
ENSG00000161533	1069.55	0.327789	0.131076	2.50075	0.0123931	0.0780429	ACOX1	51
ENSG00000184076	1720.17	-0.286858	0.114719	-2.50052	0.012401	0.0780532	UQCR10	29796
ENSG00000082482	132.195	0.701464	0.280606	2.49982	0.0124257	0.0781691	KCNK2	3776
ENSG00000163507	1317.6	-0.315215	0.126114	-2.49945	0.0124386	0.0782108	CIP2A	57650
ENSG00000174640	47.4878	-1.17978	0.472274	-2.49809	0.0124865	0.0784718	SLCO2A1	6578
ENSG00000157657	2054.27	-0.280163	0.112173	-2.4976	0.0125037	0.0785237	ZNF618	114991
ENSG00000186871	496.479	-0.404575	0.161992	-2.4975	0.0125074	0.0785237	ERCC6L	54821
ENSG00000152284	68.8485	-0.955599	0.382684	-2.49709	0.0125216	0.0785731	TCF7L1	83439
ENSG00000163389	638.662	0.391754	0.15691	2.49668	0.0125361	0.0786247	POGLUT1	56983
ENSG00000067225	37602.9	-0.22228	0.0890543	-2.49601	0.01256	0.078679	PKM	5315
ENSG00000136944	1246.21	-0.33173	0.132896	-2.49617	0.0125542	0.078679	LMX1B	4010
ENSG00000253710	217.305	0.61751	0.24741	2.4959	0.0125638	0.078679	ALG11	440138
ENSG00000141002	4878.54	-0.266061	0.106612	-2.4956	0.0125744	0.0787056	TCF25	22980
ENSG00000067955	1228.84	0.311244	0.124776	2.49443	0.0126159	0.0788421	CBFB	865
ENSG00000079335	115.76	-0.758985	0.304271	-2.49444	0.0126158	0.0788421	CDC14A	8556
ENSG00000198408	5156.33	0.247805	0.0993401	2.49451	0.0126132	0.0788421	MGEA5	10724
ENSG00000204231	1238.46	0.305303	0.122402	2.49427	0.0126216	0.0788421	RXRB	6257
ENSG00000159377	9417.19	0.233566	0.0936615	2.49372	0.0126412	0.0789246	PSMB4	5692
ENSG00000106605	1159.22	0.349539	0.140193	2.49328	0.0126571	0.0789445	BLVRA	644
ENSG00000163608	1344.43	0.323753	0.129848	2.49333	0.0126552	0.0789445	NEPRO	25871
ENSG00000103160	1908.12	0.288535	0.115753	2.49268	0.0126784	0.0789979	HSDL1	83693
ENSG00000188807	545.529	-0.447487	0.179509	-2.49284	0.0126726	0.0789979	TMEM201	199953
ENSG00000128789	1759.93	0.285168	0.114455	2.49153	0.0127196	0.0792148	PSMG2	56984
ENSG00000116670	548.269	-0.397951	0.159794	-2.4904	0.0127599	0.0794265	MAD2L2	10459
ENSG00000166415	3119.8	0.311917	0.12527	2.48996	0.0127759	0.0794573	WDR72	256764
ENSG00000231007	63.1245	-0.994598	0.399452	-2.48991	0.0127777	0.0794573
ENSG00000178952	8876.07	-0.230896	0.0927472	-2.48952	0.0127916	0.0795038	TUFM	7284
ENSG00000115514	1090.33	0.379586	0.152561	2.48809	0.012843	0.0797834	TXNDC9	10190
ENSG00000164237	1008.61	0.329387	0.132418	2.48747	0.0128655	0.0798829	CMBL	134147
[truncated: 10,413 more rows]
