# Supplementary figures and images for: Small Molecule Inhibitors of KDM5 Histone Demethylases Increase Radio-Sensitivity of Breast Cancer Cells Over-Expressing JARID1B
Source: Preprints.org preprint supplement (doi:10.20944/preprints201806.0131.v1), 2018-06-08

Volcano plot

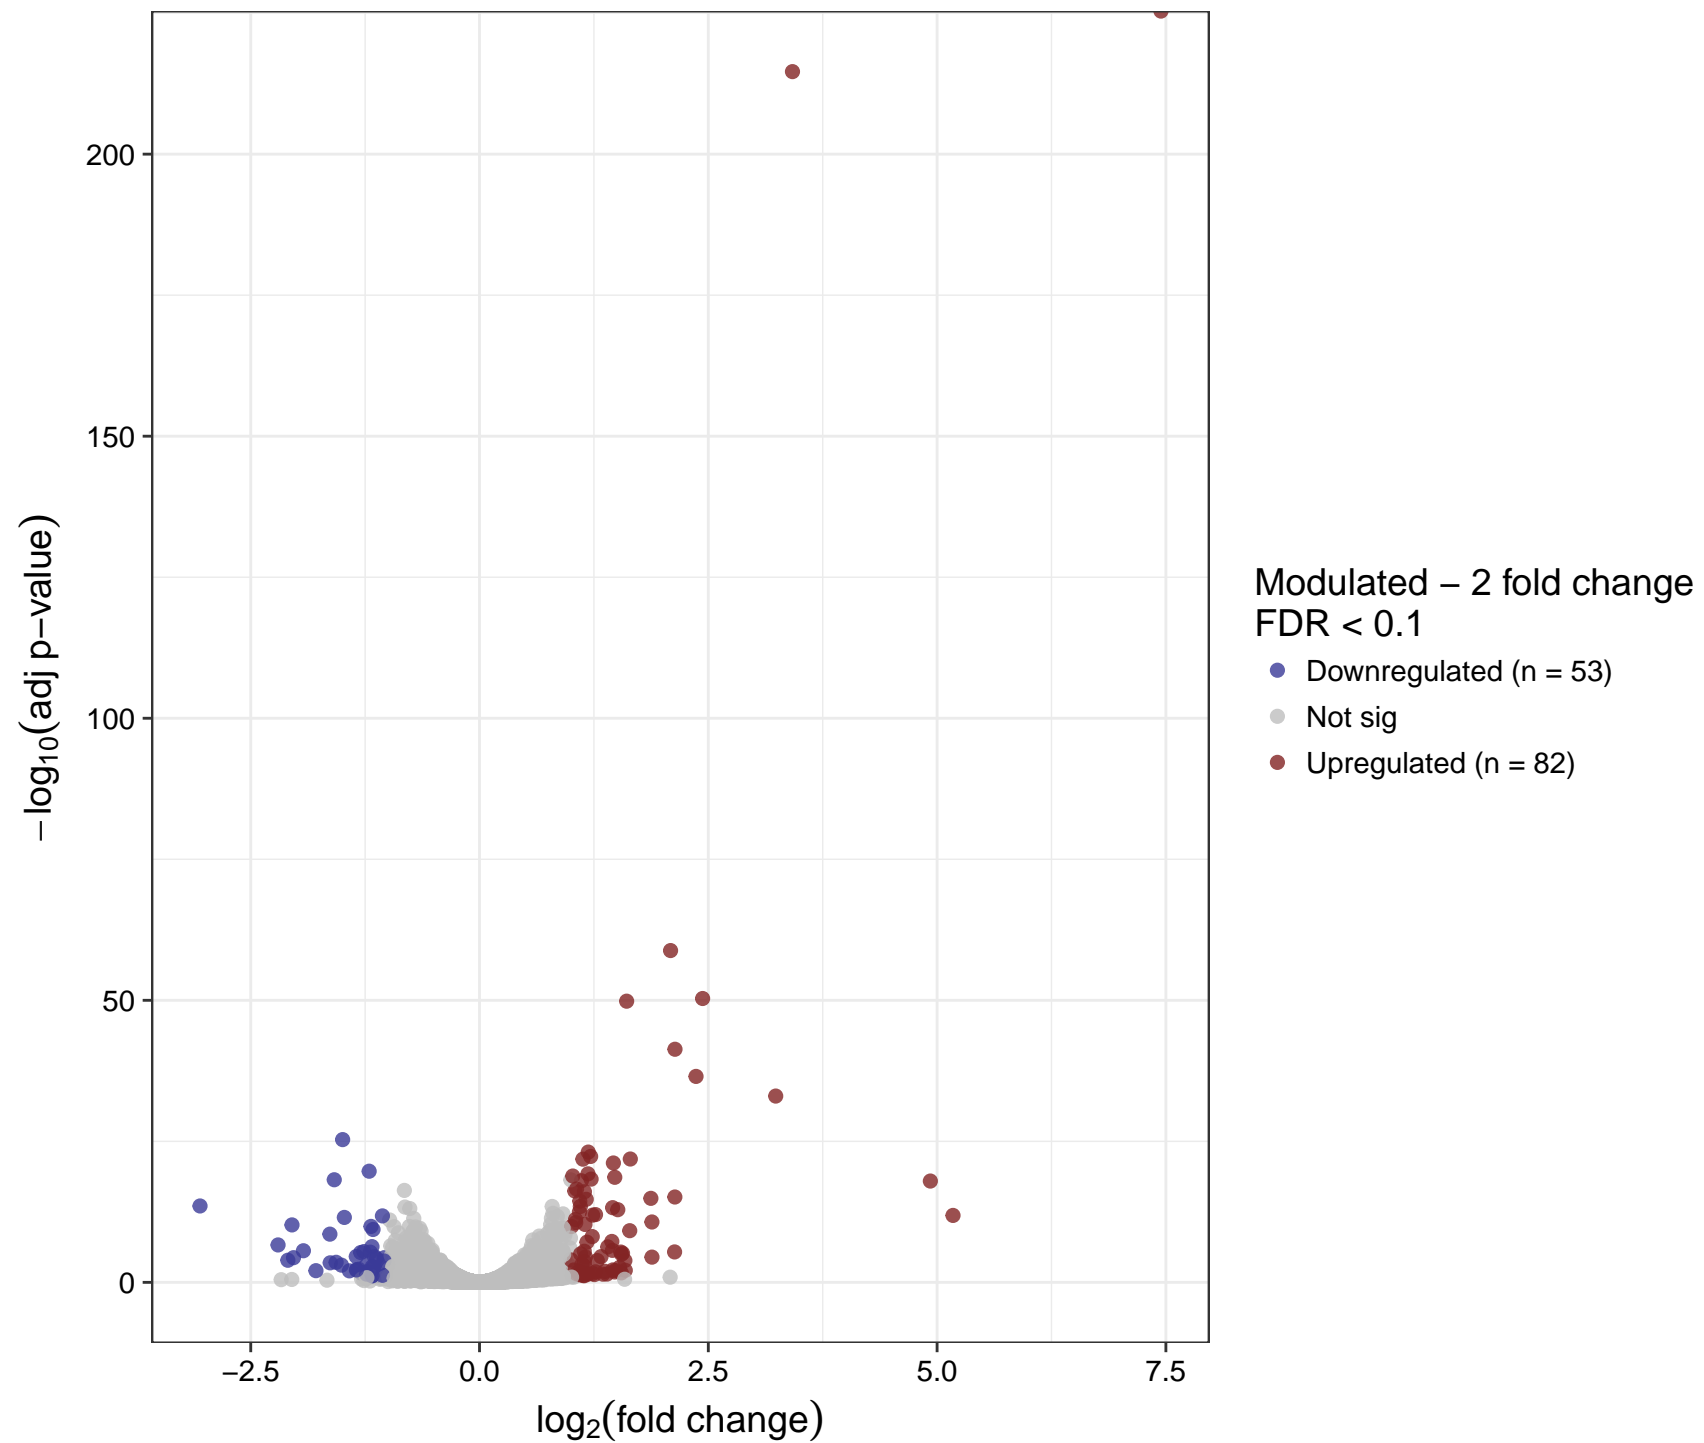

Volcano plot

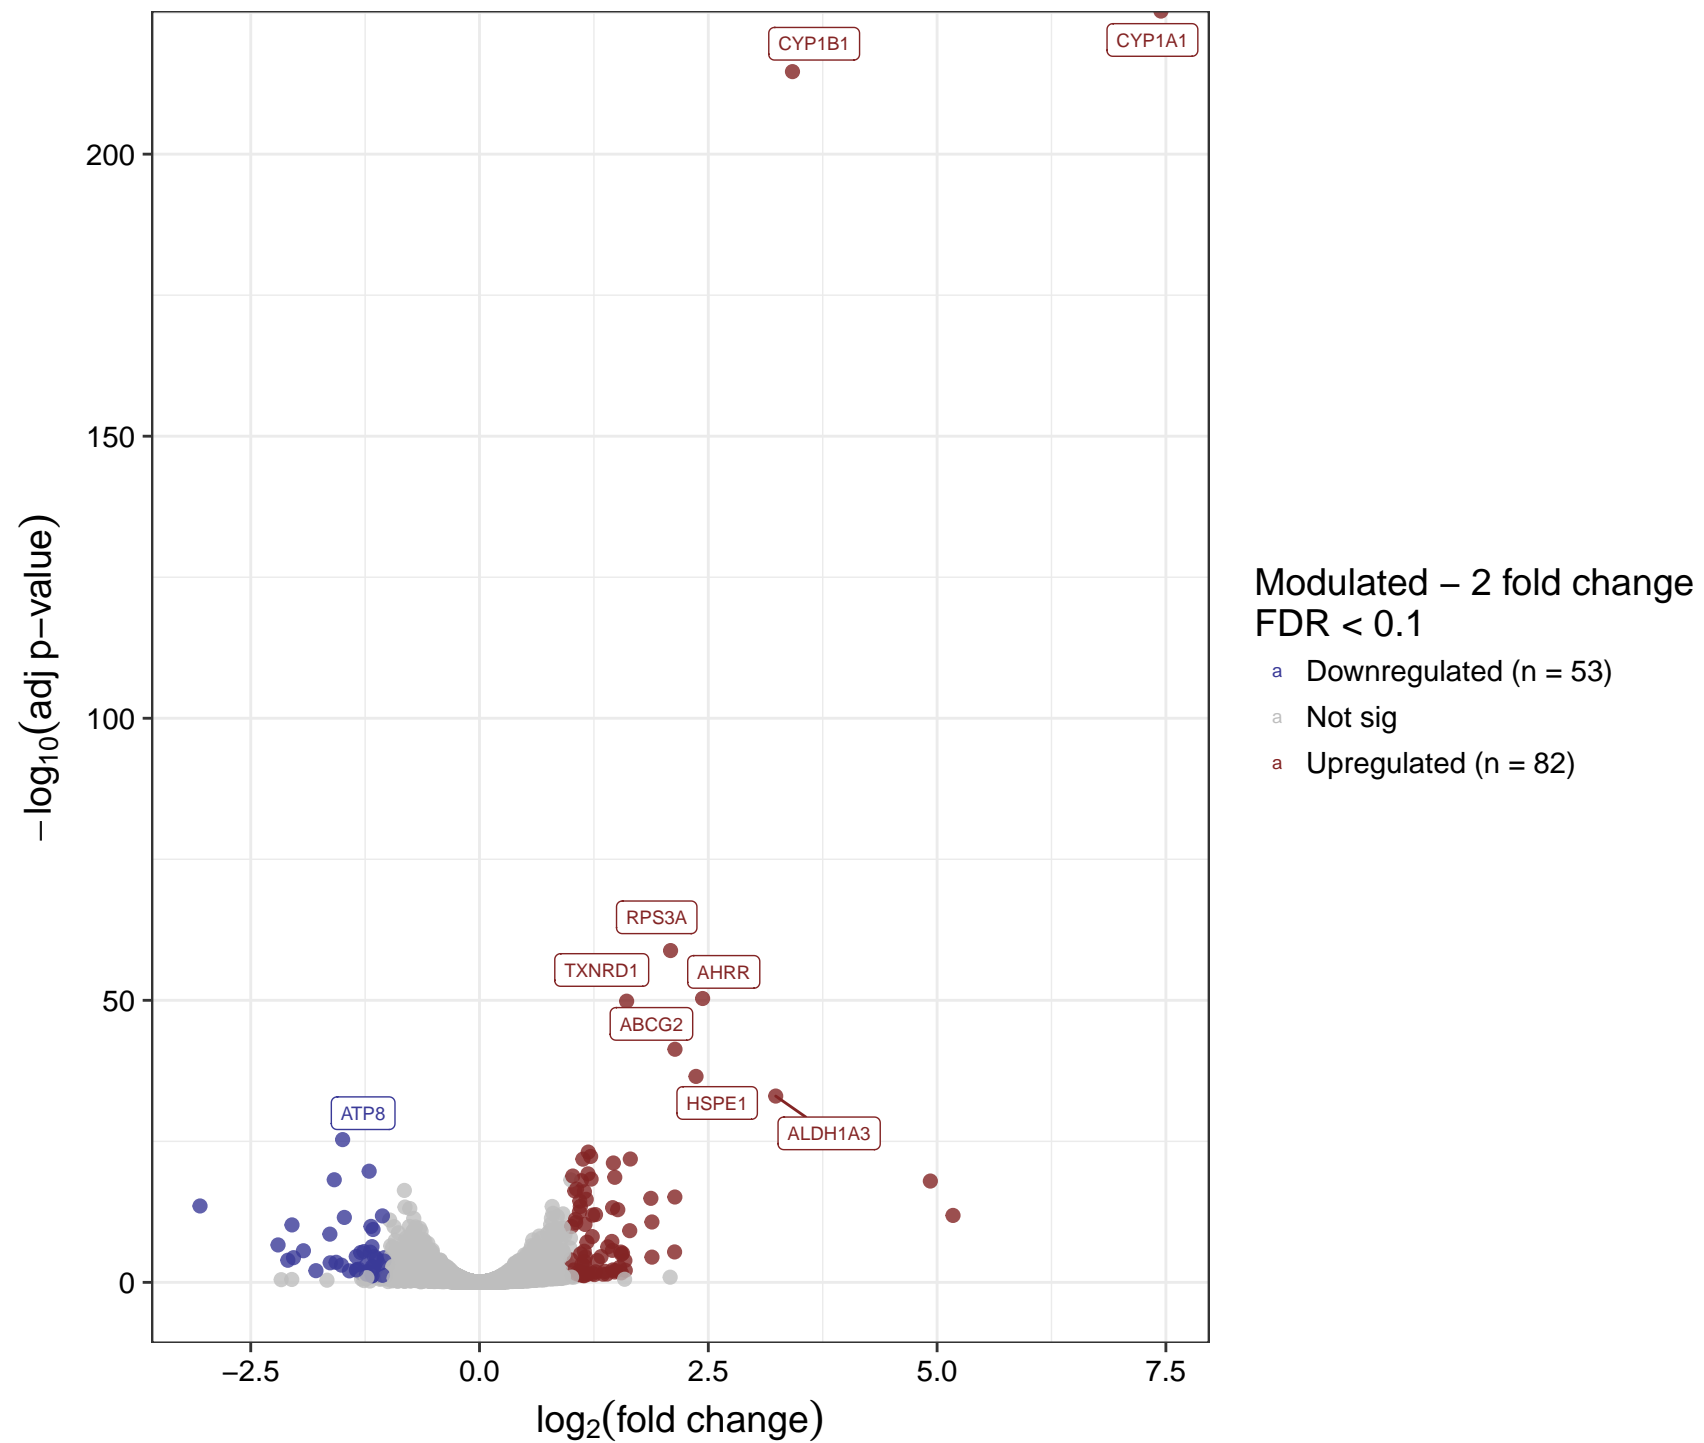

Supplement: Supplementary file 1 [file supplementary]
